# Supplementary material for: Endoplasmic reticulum membranes are continuously required to maintain mitotic spindle size and forces
Source: Life Sci Alliance. 2022 Nov 15;6(1):e202201540. doi: 10.26508/lsa.202201540 (PMC9671068; doi:10.26508/lsa.202201540)
Supplement: Supplementary file 3 [file LSA-2022-01540_SdataF2.xlsx]

## Sheet: A
	Rtnl1-GFP_p27
	centrosome															equator
	Standard Deviation	20220119_1.xlsx	20220119_2.xlsx	20220120_3.xlsx	20220120_4.xlsx	20220120_6.xlsx	20220120_7.xlsx	20220120_8.xlsx	20220121_10.xlsx	20220121_12.xlsx	20220121_13.xlsx	20220121_14.xlsx	20220121_9.xlsx			Time (seconds)	Mean Values	Standard Deviation	20220120_1.xlsx	20220120_2.xlsx	20220120_3.xlsx	20220120_4.xlsx	20220121_5.xlsx	20220121_6.xlsx	20220121_8.xlsx
	0	1	1	1	1	1	1	1	1	1	1	1	1			0	1	0	1	1	1	1	1	1	1
	0	0	0	0	0	0	0	0	0	0	0	0	0			0.526	0	0	0	0	0	0	0	0	0
	0.009289	0.020356	0.022207	0.01974	0.015631	0.017283	0.011308	-0.004374	0.014805	0.01505	0.001757	-0.004632	0.014618			1.052	0.010344	0.006511	0.003272	0.013774	0.004909	0.012722	0.008385	0.007052	0.022291
	0.016922	0.051431	0.074554	0.056024	0.062063	0.081726	0.05568	0.038168	0.044774	0.058619	0.054093	0.020687	0.033082			1.579	0.046765	0.0125	0.025755	0.052308	0.054154	0.057829	0.059144	0.036158	0.04201
	0.01983	0.101746	0.127167	0.084632	0.083494	0.106956	0.098066	0.065205	0.060484	0.08423	0.079537	0.062705	0.075062			2.105	0.073046	0.014364	0.0445	0.081754	0.076013	0.088051	0.08027	0.065535	0.075197
	0.029512	0.136912	0.169456	0.125589	0.105286	0.153519	0.126635	0.099067	0.083352	0.127643	0.109673	0.06375	0.098541			2.631	0.098987	0.024445	0.052928	0.094471	0.110624	0.121429	0.11656	0.082719	0.11418
	0.032359	0.168077	0.205764	0.162131	0.142209	0.175053	0.161815	0.122322	0.101567	0.157883	0.132278	0.096426	0.118186			3.158	0.120169	0.025151	0.0739	0.133648	0.122982	0.138033	0.150548	0.105733	0.116338
	0.038818	0.202914	0.230709	0.180602	0.162173	0.234484	0.192181	0.133677	0.116926	0.196411	0.168743	0.123101	0.155194			3.684	0.140591	0.031174	0.092112	0.144924	0.14177	0.176886	0.176381	0.111226	0.14084
	0.039923	0.219835	0.236905	0.212143	0.210252	0.242298	0.212126	0.154468	0.122125	0.225364	0.193541	0.133045	0.175318			4.21	0.162498	0.027678	0.115792	0.166219	0.166571	0.193602	0.193671	0.141528	0.160099
	0.039233	0.250101	0.260177	0.236398	0.232604	0.25365	0.225221	0.173956	0.13863	0.248394	0.212501	0.167325	0.195072			4.736	0.182368	0.040644	0.11986	0.174482	0.196104	0.199824	0.230155	0.138525	0.217625
	0.039286	0.275192	0.289012	0.258723	0.248541	0.244726	0.254445	0.210165	0.165233	0.278737	0.215426	0.176096	0.229453			5.263	0.196186	0.042794	0.126736	0.196142	0.197754	0.227275	0.239815	0.152363	0.23322
	0.044131	0.284526	0.319893	0.282295	0.281144	0.294443	0.278245	0.215758	0.188082	0.29245	0.237798	0.184321	0.239869			5.789	0.214552	0.03702	0.153508	0.207261	0.213322	0.236589	0.248245	0.184555	0.258381
	0.044983	0.302828	0.336961	0.296241	0.294376	0.304607	0.282679	0.230897	0.197772	0.32282	0.259541	0.203093	0.258099			6.315	0.233132	0.042737	0.177996	0.223866	0.239269	0.261983	0.264272	0.177534	0.287003
	0.043325	0.317036	0.342186	0.312002	0.325598	0.3197	0.280882	0.228209	0.214378	0.332289	0.272955	0.23656	0.285757			6.842	0.244444	0.041574	0.18578	0.246754	0.242673	0.278342	0.281695	0.191571	0.284296
	0.041711	0.335757	0.333598	0.334613	0.323225	0.318651	0.312939	0.247866	0.217721	0.341471	0.281154	0.245966	0.299068			7.368	0.260071	0.045427	0.183777	0.252015	0.256444	0.295315	0.308584	0.224248	0.300118
	0.039587	0.336194	0.359178	0.344502	0.335975	0.293368	0.325587	0.268282	0.24215	0.351636	0.305525	0.252488	0.329876			7.894	0.27715	0.050879	0.197775	0.291144	0.262988	0.303684	0.34097	0.227026	0.316468
	0.043177	0.349518	0.364836	0.374071	0.352317	0.32181	0.3352	0.268955	0.243527	0.365472	0.324942	0.265049	0.331326			8.421	0.294054	0.047576	0.222397	0.302641	0.293686	0.3275	0.353245	0.238688	0.320223
	0.040801	0.367057	0.387029	0.373087	0.366934	0.320943	0.348179	0.282496	0.277507	0.372664	0.332278	0.281285	0.376535			8.947	0.309467	0.056804	0.224457	0.316508	0.301579	0.358778	0.38085	0.24796	0.336139
	0.036644	0.374514	0.375667	0.400452	0.367639	0.351385	0.366054	0.291821	0.301787	0.377607	0.345938	0.296629	0.383927			9.473	0.311746	0.052179	0.236265	0.33349	0.318673	0.357984	0.361569	0.240837	0.333403
	0.040829	0.401237	0.372197	0.403801	0.381911	0.337315	0.367863	0.298908	0.311887	0.390544	0.349264	0.310152	0.423239			9.999	0.326146	0.055673	0.246553	0.340897	0.327041	0.38344	0.378374	0.253385	0.353334
	0.045343	0.431658	0.387833	0.431515	0.387859	0.367106	0.376745	0.296452	0.311451	0.389753	0.342581	0.319139	0.412319			10.526	0.343907	0.058526	0.273118	0.371158	0.337237	0.406488	0.39969	0.257853	0.361805
	0.040996	0.440131	0.406621	0.44406	0.39783	0.377513	0.381123	0.317332	0.343122	0.400136	0.374106	0.328436	0.422283			11.052	0.358105	0.062757	0.273611	0.373638	0.36007	0.416633	0.425557	0.271465	0.385759
	0.036797	0.435672	0.398013	0.457221	0.40141	0.372036	0.400266	0.338146	0.354772	0.425978	0.390517	0.345648	0.417311			11.578	0.367814	0.0579	0.288454	0.39929	0.37069	0.42313	0.42108	0.286532	0.385518
	0.042864	0.453756	0.404287	0.470221	0.406186	0.369986	0.40692	0.330043	0.359897	0.428249	0.409953	0.339999	0.419621			12.105	0.375304	0.066031	0.285293	0.41076	0.389754	0.441988	0.432025	0.281408	0.385902
	0.04105	0.447437	0.405281	0.480251	0.422513	0.403395	0.410921	0.337821	0.373235	0.440307	0.413902	0.349106	0.437804			12.63	0.387408	0.067006	0.296661	0.410206	0.391116	0.462824	0.451012	0.296908	0.403126
	0.042608	0.448445	0.416343	0.494824	0.42229	0.388387	0.431351	0.356394	0.368409	0.450767	0.430143	0.354956	0.442987			13.157	0.390428	0.066949	0.296791	0.425316	0.397682	0.458852	0.445292	0.297145	0.411919
	0.049238	0.478577	0.430656	0.51115	0.41082	0.414638	0.419353	0.335677	0.389511	0.441624	0.431322	0.376576	0.489634			13.683	0.402162	0.064661	0.318658	0.417762	0.414394	0.474365	0.461357	0.308909	0.419686
	0.046655	0.497017	0.462606	0.49118	0.431118	0.451763	0.432243	0.341808	0.381285	0.464363	0.42553	0.400227	0.482872			14.209	0.403836	0.054886	0.319014	0.416898	0.419771	0.464158	0.433711	0.335009	0.43829
	0.048591	0.481936	0.447122	0.514673	0.451788	0.456555	0.470017	0.359343	0.38204	0.46663	0.427513	0.388679	0.505904			14.736	0.416825	0.059341	0.320937	0.432737	0.440095	0.480586	0.440348	0.346525	0.45655
	0.054841	0.500946	0.445144	0.525955	0.461085	0.482072	0.45811	0.350909	0.390529	0.49039	0.436539	0.401277	0.529851			15.262	0.418283	0.059689	0.331523	0.445797	0.435008	0.48272	0.452002	0.335802	0.445131
	0.056828	0.504932	0.447683	0.524321	0.467483	0.477075	0.459746	0.348993	0.381484	0.487974	0.443301	0.413627	0.544836			15.788	0.425336	0.061065	0.343071	0.454206	0.440959	0.485716	0.462311	0.333332	0.457754
	0.058787	0.500572	0.480649	0.524079	0.461279	0.491502	0.46478	0.344298	0.388406	0.506242	0.447533	0.412297	0.549176			16.314	0.439329	0.067607	0.34539	0.459401	0.451599	0.497764	0.484872	0.341785	0.494491
	0.056228	0.513096	0.47155	0.5198	0.478288	0.506074	0.485446	0.354609	0.399623	0.501705	0.462078	0.42129	0.554777			16.841	0.44527	0.067186	0.363851	0.44883	0.461876	0.497437	0.490297	0.341359	0.51324
	0.052077	0.509752	0.469798	0.538283	0.491569	0.503522	0.478898	0.366778	0.417366	0.502527	0.464666	0.434607	0.552698			17.367	0.451393	0.068615	0.366295	0.470641	0.461429	0.507181	0.475942	0.348249	0.530016
	0.06201	0.523246	0.483789	0.554705	0.503513	0.530895	0.478826	0.369774	0.415822	0.519447	0.453288	0.44388	0.593422			17.893	0.461013	0.066452	0.378108	0.465733	0.473998	0.506727	0.495684	0.36391	0.542928
	0.05527	0.539993	0.499373	0.544228	0.499271	0.515811	0.499586	0.379958	0.426038	0.513449	0.446725	0.452929	0.575128			18.42	0.458949	0.071383	0.385368	0.469025	0.464454	0.503711	0.495033	0.343939	0.551113
	0.058916	0.520243	0.452233	0.542682	0.519494	0.515208	0.494352	0.377124	0.437068	0.525999	0.453429	0.44864	0.597965			18.946	0.475111	0.077772	0.388912	0.48983	0.490342	0.529669	0.482579	0.359611	0.584836
	0.061473	0.545491	0.463152	0.548337	0.496738	0.528227	0.495919	0.367915	0.413419	0.529032	0.457711	0.463017	0.58366			19.472	0.484276	0.075174	0.399075	0.482091	0.504201	0.536413	0.501563	0.375528	0.59106
	0.060724	0.563451	0.486959	0.552654	0.526674	0.532279	0.508607	0.391399	0.42211	0.530799	0.473707	0.475699	0.610166			19.998	0.494613	0.080153	0.390821	0.4899	0.508369	0.552937	0.516104	0.393478	0.610679
	0.066228	0.562227	0.479641	0.568697	0.529109	0.514909	0.518893	0.388991	0.411829	0.539056	0.466358	0.468274	0.620174			20.525	0.497569	0.077887	0.400422	0.48227	0.514754	0.536373	0.517544	0.406583	0.625036
	0.06687	0.550282	0.469759	0.565923	0.534811	0.531368	0.512829	0.391928	0.416479	0.56384	0.487209	0.488544	0.633412			21.051	0.502077	0.075064	0.408623	0.508197	0.523795	0.53426	0.514926	0.404775	0.619961
	0.068003	0.563069	0.485679	0.584335	0.557291	0.520873	0.498395	0.392244	0.434596	0.561186	0.504634	0.501464	0.646315			21.577	0.509548	0.075811	0.424305	0.507327	0.532445	0.558259	0.513241	0.405563	0.625692
	0.064982	0.561324	0.48751	0.58869	0.55446	0.542169	0.506402	0.39611	0.449579	0.564579	0.514742	0.501637	0.641824			22.104	0.517342	0.082148	0.422345	0.520693	0.536861	0.55555	0.53138	0.406414	0.648149
	0.06543	0.564527	0.49847	0.595877	0.539456	0.525236	0.519696	0.40761	0.4487	0.565749	0.52553	0.498307	0.658335			22.63	0.524	0.079194	0.434036	0.52242	0.539124	0.558093	0.547608	0.41629	0.65043
	0.069146	0.580141	0.510305	0.576024	0.537344	0.544905	0.506627	0.414664	0.460137	0.579169	0.529459	0.486555	0.686477			23.156	0.52684	0.078678	0.437444	0.522538	0.546598	0.572134	0.533061	0.423161	0.65294
	0.069065	0.559565	0.508276	0.594068	0.543991	0.529056	0.504038	0.40042	0.465029	0.566946	0.560307	0.505835	0.680151			23.682	0.534782	0.081977	0.433832	0.547354	0.567043	0.581107	0.542208	0.420361	0.651567
	0.074969	0.553705	0.495426	0.589725	0.561989	0.534639	0.501335	0.42575	0.452528	0.574787	0.558306	0.494726	0.715806			24.209	0.539468	0.091779	0.428289	0.549977	0.579746	0.57215	0.564065	0.409176	0.672875
	0.069732	0.549022	0.498852	0.593297	0.547868	0.550641	0.519112	0.425015	0.463516	0.579039	0.564712	0.509067	0.701672			24.735	0.544016	0.094891	0.425476	0.543312	0.566315	0.583048	0.587726	0.417063	0.685173
	0.066571	0.528032	0.504407	0.599824	0.560272	0.545072	0.528362	0.441108	0.476328	0.57788	0.56615	0.518554	0.704904			25.261	0.54428	0.101579	0.411321	0.529896	0.576791	0.588905	0.573095	0.424815	0.705137
	0.075318	0.523772	0.506105	0.610001	0.563943	0.54157	0.537975	0.4259	0.47635	0.581746	0.591949	0.502548	0.723062			25.787	0.543892	0.096569	0.416994	0.536995	0.585141	0.591985	0.584833	0.41506	0.676235
	0.072902	0.547048	0.496381	0.58905	0.569583	0.575912	0.54019	0.446589	0.476507	0.581457	0.587998	0.518184	0.733537			26.314	0.56231	0.099579	0.419355	0.561845	0.579926	0.612531	0.619586	0.443441	0.699484
	0.079113	0.547212	0.501777	0.614383	0.575551	0.569445	0.536602	0.464528	0.46175	0.580581	0.593286	0.507859	0.756088			26.84	0.569211	0.098402	0.429912	0.569018	0.592428	0.605399	0.632601	0.449718	0.705401
	0.079251	0.549003	0.498005	0.615791	0.560575	0.563678	0.525473	0.458891	0.484763	0.583214	0.590551	0.51775	0.764129			27.366	0.561704	0.091271	0.42538	0.564296	0.589126	0.609179	0.617483	0.450828	0.675636
	0.074883	0.571609	0.496064	0.608803	0.552326	0.568362	0.528726	0.473832	0.491571	0.600766	0.598725	0.528743	0.754863			27.892	0.568997	0.093198	0.430162	0.581752	0.584539	0.636309	0.642987	0.448835	0.658395
	0.074703	0.574536	0.499066	0.607232	0.559158	0.567887	0.506191	0.484316	0.496828	0.5949	0.60452	0.523094	0.755518			28.419	0.576459	0.094732	0.443503	0.584156	0.576453	0.636063	0.669352	0.454318	0.671371
	0.081956	0.564824	0.473579	0.622638	0.579105	0.602502	0.547984	0.469174	0.507092	0.606529	0.611469	0.541747	0.776205			28.945	0.578483	0.089548	0.450489	0.600266	0.597595	0.637031	0.649698	0.453513	0.660788
	0.073045	0.581508	0.483673	0.616464	0.588634	0.61216	0.52935	0.490406	0.514479	0.614778	0.621516	0.555425	0.748965			29.471	0.580537	0.091216	0.455592	0.603056	0.605378	0.634798	0.627762	0.450845	0.68633
	0.075473	0.591979	0.511005	0.620385	0.574348	0.619335	0.553279	0.483647	0.497311	0.622093	0.629587	0.552607	0.761662			29.998	0.577729	0.087837	0.448754	0.607435	0.601311	0.623494	0.609163	0.464867	0.689076
	0.076761	0.572725	0.490052	0.620906	0.560852	0.636663	0.573017	0.481456	0.499724	0.637711	0.626592	0.555755	0.751199			30.524	0.577318	0.094358	0.432814	0.614725	0.612272	0.628716	0.58371	0.46802	0.700967
	0.077482	0.562309	0.498744	0.611153	0.564173	0.654754	0.566909	0.474935	0.491737	0.629558	0.638681	0.560499	0.744791			31.05	0.580044	0.091914	0.450351	0.620198	0.632868	0.624675	0.585821	0.456262	0.690132
	0.081127	0.575177	0.486813	0.64258	0.56651	0.639662	0.553037	0.498867	0.486746	0.639545	0.634681	0.5493	0.761696			31.577	0.580756	0.090317	0.447826	0.617077	0.608648	0.623954	0.622001	0.460012	0.685774
	0.080134	0.576621	0.492818	0.619621	0.584617	0.646163	0.550831	0.506345	0.492284	0.641604	0.617063	0.55242	0.774703			32.103	0.582079	0.088148	0.451047	0.626249	0.599974	0.654006	0.597742	0.468875	0.676659
	0.07717	0.556236	0.488621	0.613838	0.553217	0.640598	0.562691	0.505606	0.497543	0.642842	0.606796	0.564723	0.763395			32.629	0.584367	0.090795	0.45257	0.646465	0.604429	0.649383	0.577081	0.471875	0.688764
	0.081648	0.579117	0.487265	0.628383	0.577607	0.631314	0.551025	0.498397	0.496467	0.653176	0.604884	0.580127	0.780701			33.155	0.588685	0.09328	0.466088	0.632798	0.619148	0.657065	0.583778	0.459543	0.702377
	0.072266	0.558129	0.512058	0.633007	0.601596	0.644501	0.547285	0.523414	0.503494	0.647748	0.623553	0.577004	0.754961			33.681	0.583043	0.092861	0.462856	0.634355	0.602897	0.665229	0.556754	0.463853	0.695358
	0.07408	0.554761	0.503346	0.629532	0.586142	0.631765	0.531241	0.527932	0.48943	0.620566	0.612339	0.586572	0.762027			34.208	0.59095	0.093481	0.469292	0.654187	0.591843	0.660909	0.575854	0.472898	0.711669
	0.073275	0.556308	0.508818	0.625699	0.612914	0.645239	0.527567	0.53817	0.488506	0.633014	0.603815	0.594665	0.755971			34.734	0.598659	0.093112	0.492785	0.661435	0.599498	0.671481	0.581411	0.467141	0.716859
	0.070091	0.535732	0.523152	0.614849	0.616541	0.63624	0.536165	0.547793	0.502843	0.635765	0.614678	0.606075	0.757682			35.26	0.604278	0.089792	0.497035	0.653495	0.591792	0.661378	0.601806	0.487913	0.736525
	0.06829	0.541578	0.507923	0.625654	0.612293	0.620617	0.542627	0.536796	0.522042	0.641059	0.620096	0.615927	0.750966			35.787	0.612481	0.099304	0.49704	0.652321	0.609884	0.676151	0.61009	0.479442	0.762441
	0.068382	0.529443	0.505036	0.630368	0.585395	0.603172	0.55496	0.566235	0.507889	0.633744	0.620899	0.618852	0.752974			36.313	0.619504	0.096414	0.508831	0.667534	0.621069	0.668331	0.620594	0.485857	0.764313
	0.066943	0.536915	0.516423	0.636929	0.59077	0.584331	0.551386	0.579649	0.523494	0.636932	0.629279	0.632215	0.757462			36.839	0.616367	0.092546	0.521186	0.669744	0.593626	0.668996	0.629201	0.481691	0.750124
	0.073974	0.525259	0.515359	0.61355	0.59201	0.584564	0.551468	0.568992	0.521933	0.639843	0.623549	0.647618	0.782293			37.366	0.624338	0.091649	0.519561	0.689863	0.610368	0.673201	0.657708	0.485318	0.73435
	0.073576	0.524575	0.515769	0.626792	0.579779	0.607219	0.558609	0.57038	0.519813	0.661181	0.622836	0.666846	0.766934			37.892	0.622921	0.092561	0.521618	0.669737	0.610477	0.701239	0.63125	0.485786	0.740341
	0.071042	0.548037	0.53067	0.637349	0.577426	0.593728	0.564893	0.57993	0.525651	0.664108	0.613211	0.659681	0.777457			38.418	0.626057	0.089884	0.542297	0.681141	0.601211	0.688419	0.631335	0.489013	0.748979
	0.070808	0.535751	0.548707	0.630613	0.577842	0.602434	0.586029	0.577687	0.534783	0.682763	0.625879	0.665655	0.778837			38.944	0.634597	0.102888	0.533438	0.696455	0.602776	0.710031	0.625747	0.490809	0.78292
	0.075206	0.542794	0.561086	0.616038	0.582819	0.578247	0.565664	0.57715	0.522759	0.704187	0.626572	0.680755	0.77953			39.471	0.630787	0.100016	0.536328	0.693042	0.602125	0.708799	0.614189	0.489025	0.772001
	0.076148	0.537373	0.572118	0.615397	0.610505	0.58988	0.576649	0.55918	0.511508	0.711008	0.623945	0.677392	0.778711			39.997	0.640266	0.101661	0.526497	0.703361	0.601067	0.724888	0.6403	0.508014	0.777733
	0.07348	0.542027	0.558665	0.60487	0.620592	0.633301	0.574977	0.558297	0.521435	0.70173	0.616717	0.672065	0.776467			40.523	0.646558	0.100056	0.546768	0.703843	0.59882	0.733611	0.656245	0.507561	0.779059
	0.074447	0.525259	0.581662	0.59035	0.598947	0.628005	0.586853	0.544536	0.527209	0.676264	0.62026	0.663377	0.792062			41.049	0.648538	0.105425	0.533434	0.709902	0.60261	0.728714	0.67487	0.50296	0.787276
	0.070874	0.539634	0.550985	0.591639	0.598562	0.640641	0.578603	0.554874	0.540117	0.683821	0.635824	0.671268	0.7736			41.576	0.652886	0.096979	0.552989	0.689005	0.590337	0.744531	0.679567	0.530215	0.783556
	0.070799	0.554951	0.567414	0.594346	0.58243	0.623183	0.570624	0.566723	0.521017	0.672214	0.628951	0.674761	0.781398			42.102	0.655295	0.099546	0.544489	0.710935	0.590971	0.748666	0.684698	0.530452	0.776854
	0.071126	0.541638	0.548158	0.581373	0.572168	0.605189	0.560324	0.556597	0.50611	0.66015	0.631294	0.665474	0.765081			42.628	0.660065	0.100394	0.55441	0.694053	0.591157	0.759734	0.693182	0.536784	0.791133
	0.06647	0.563794	0.559541	0.584373	0.555017	0.613138	0.568135	0.576446	0.517293	0.675608	0.635844	0.634803	0.763642			43.154	0.660791	0.089721	0.569255	0.707994	0.58207	0.746111	0.675263	0.563485	0.781361
	0.060401	0.56044	0.552924	0.571318	0.566283	0.63025	0.586026	0.568573	0.529359	0.661637	0.636758	0.623369	0.747323			43.681	0.666581	0.101366	0.55751	0.708349	0.585277	0.756987	0.68837	0.558124	0.811453
	0.058043	0.566949	0.555803	0.573116	0.559503	0.612964	0.581356	0.581973	0.542044	0.672627	0.635589	0.628546	0.742581			44.207	0.662171	0.108986	0.54614	0.699865	0.573741	0.769778	0.683856	0.547095	0.814724
	0.064583	0.55622	0.550594	0.565503	0.559751	0.583429	0.569379	0.600726	0.532905	0.68595	0.641578	0.635693	0.750652			44.733	0.665635	0.101903	0.544159	0.718832	0.585293	0.75884	0.713397	0.552699	0.786223
	0.056312	0.570627	0.540456	0.551442	0.569848	0.587323	0.59385	0.594395	0.545581	0.6791	0.622324	0.619148	0.729976			45.26	0.668319	0.104297	0.546719	0.699069	0.59158	0.773814	0.71193	0.554182	0.800939
	0.059872	0.580312	0.538312	0.564194	0.568362	0.581694	0.556836	0.597284	0.579162	0.677928	0.644215	0.632789	0.746962			45.786	0.660935	0.108585	0.539604	0.713277	0.576861	0.757728	0.713469	0.53227	0.79334
	0.058963	0.582613	0.530444	0.579466	0.563159	0.599142	0.574113	0.57688	0.56809	0.682303	0.644542	0.618793	0.742515			46.312	0.666566	0.105706	0.550503	0.718199	0.575024	0.793891	0.719025	0.546774	0.762549
	0.059303	0.594983	0.543854	0.582763	0.562951	0.641625	0.586441	0.57585	0.555841	0.666606	0.652251	0.624992	0.752463			46.838	0.682136	0.114827	0.559359	0.733691	0.579548	0.801022	0.752308	0.548654	0.800372
	0.060076	0.591162	0.559907	0.563451	0.553242	0.627749	0.584693	0.562975	0.54337	0.675671	0.658252	0.624626	0.740706			47.365	0.679812	0.114876	0.547954	0.725351	0.577394	0.806925	0.767406	0.554886	0.778768
	0.062032	0.606723	0.557758	0.572904	0.551295	0.613514	0.594574	0.565419	0.547237	0.676158	0.648867	0.637797	0.75811			47.891	0.680996	0.112886	0.541821	0.727187	0.582413	0.803896	0.759719	0.566687	0.785252
	0.064572	0.61035	0.555664	0.571031	0.540297	0.634801	0.586134	0.57732	0.548418	0.680609	0.639484	0.63095	0.765666			48.417	0.681668	0.109905	0.544711	0.737422	0.590088	0.790583	0.74954	0.566211	0.793125
	0.070786	0.601536	0.557642	0.565126	0.544729	0.645064	0.588562	0.551733	0.535372	0.696796	0.642929	0.63288	0.772026			48.943	0.682524	0.114023	0.548475	0.734839	0.583249	0.797265	0.760289	0.5581	0.79545
	0.069915	0.620713	0.550778	0.570544	0.53456	0.644086	0.569423	0.557656	0.533379	0.710986	0.648195	0.633278	0.748856			49.47	0.681266	0.114792	0.54778	0.729341	0.58277	0.798075	0.758638	0.554579	0.797678
	0.072782	0.633273	0.54689	0.587973	0.518219	0.624583	0.58349	0.538079	0.536767	0.711559	0.626173	0.628958	0.759993			49.996	0.686825	0.111809	0.542935	0.737156	0.600831	0.777651	0.761956	0.570359	0.81689
	0.07212	0.654901	0.564749	0.590811	0.52274	0.602749	0.574758	0.533905	0.537255	0.709658	0.626795	0.623968	0.759699			50.522	0.681518	0.118245	0.533842	0.731762	0.581832	0.807131	0.737678	0.565555	0.812825
	0.073792	0.651136	0.556447	0.59714	0.532168	0.593379	0.590954	0.550721	0.530024	0.72539	0.614996	0.624447	0.76823			51.049	0.683513	0.115379	0.544312	0.718172	0.595094	0.82242	0.742883	0.561181	0.80053
	0.077419	0.647671	0.53105	0.624215	0.530201	0.5918	0.605927	0.547268	0.526127	0.726824	0.61153	0.637722	0.771421			51.575	0.680082	0.117928	0.539679	0.724619	0.568892	0.805071	0.733713	0.570854	0.81775
	0.073597	0.657015	0.53618	0.615742	0.538637	0.611341	0.601076	0.570825	0.511753	0.726857	0.609919	0.646776	0.754304			52.101	0.681181	0.119165	0.529822	0.729537	0.573233	0.802226	0.728615	0.578931	0.8259
	0.069837	0.651124	0.544305	0.610576	0.531444	0.616127	0.577466	0.573531	0.532239	0.725042	0.604642	0.652512	0.744481			52.627	0.68509	0.112052	0.546682	0.714673	0.595394	0.817994	0.706293	0.588641	0.825951
	0.074092	0.667669	0.555478	0.617423	0.543386	0.595654	0.586134	0.574477	0.512374	0.736796	0.61755	0.634009	0.757754			53.154	0.681009	0.117584	0.540466	0.742522	0.574424	0.802718	0.719334	0.5684	0.819201
	0.073805	0.654881	0.556337	0.61649	0.562441	0.606397	0.568237	0.575505	0.505205	0.74477	0.623919	0.642497	0.751518			53.68	0.689909	0.114619	0.557148	0.749154	0.583096	0.819239	0.720611	0.580884	0.819235
	0.078832	0.681192	0.569219	0.634847	0.556079	0.585754	0.584394	0.561679	0.505219	0.735704	0.61023	0.628161	0.778653			54.206	0.692199	0.115253	0.560492	0.738659	0.583484	0.834637	0.718745	0.588348	0.821029
	0.080209	0.671651	0.571448	0.623183	0.554591	0.578904	0.58955	0.561838	0.491713	0.728874	0.605754	0.628792	0.784515			54.732	0.690377	0.119675	0.559846	0.73423	0.58184	0.84506	0.703704	0.580052	0.827907
	0.079349	0.673224	0.589872	0.625376	0.56125	0.572636	0.588464	0.577611	0.483862	0.725441	0.594963	0.618101	0.783985			55.259	0.684516	0.116626	0.558914	0.726651	0.580418	0.838722	0.693738	0.576031	0.817138
	0.083255	0.648846	0.605256	0.610675	0.560085	0.585313	0.589387	0.552548	0.491436	0.745885	0.603239	0.618114	0.799559			55.785	0.695384	0.114696	0.56864	0.746673	0.594246	0.83736	0.699133	0.589657	0.831978
	0.086246	0.671091	0.605009	0.613092	0.555894	0.589804	0.579925	0.573502	0.497518	0.752478	0.578136	0.596838	0.807984			56.311	0.689453	0.113624	0.571555	0.727987	0.586029	0.842003	0.725269	0.570881	0.802445
	0.094733	0.646294	0.637935	0.605302	0.567423	0.585883	0.60474	0.572628	0.475617	0.759716	0.568151	0.603324	0.838641			56.838	0.693348	0.118265	0.567493	0.744998	0.592585	0.837875	0.734034	0.56043	0.816021
	0.092317	0.673891	0.628567	0.609204	0.539555	0.578657	0.603488	0.598379	0.488809	0.760953	0.582455	0.581708	0.824582			57.364	0.696661	0.114025	0.561116	0.758739	0.582526	0.841337	0.721749	0.603021	0.808141
	0.090084	0.677817	0.649175	0.570804	0.553613	0.58129	0.602739	0.596178	0.482566	0.736704	0.579961	0.571374	0.818585			57.89	0.69941	0.114499	0.576756	0.752153	0.575555	0.832254	0.742224	0.594774	0.822151
	0.089354	0.674873	0.619897	0.585456	0.555386	0.577526	0.591067	0.604643	0.488082	0.722846	0.568961	0.576856	0.830439			58.416	0.706204	0.116624	0.586321	0.740011	0.561089	0.84253	0.757966	0.620891	0.834623
	0.088126	0.686418	0.641289	0.58334	0.54218	0.605182	0.591575	0.629804	0.489204	0.720034	0.559774	0.565899	0.815907			58.943	0.710396	0.124284	0.582163	0.735594	0.560986	0.85584	0.760398	0.620577	0.857213
	0.087832	0.699632	0.666723	0.601494	0.538946	0.602588	0.564345	0.610546	0.509788	0.721246	0.582475	0.581364	0.822361			59.469	0.712161	0.13008	0.575456	0.760661	0.568715	0.857121	0.727999	0.613176	0.881999
	0.088349	0.678704	0.628077	0.589214	0.541732	0.580793	0.568358	0.623268	0.520833	0.744232	0.588096	0.573935	0.826643			59.995	0.716156	0.124361	0.568039	0.75879	0.596332	0.850607	0.732802	0.623697	0.882822
	0.08754	0.683474	0.629163	0.571661	0.555229	0.612828	0.593798	0.600976	0.530996	0.740855	0.575729	0.564239	0.832545			60.522	0.721301	0.121906	0.570134	0.759749	0.587238	0.834632	0.770852	0.644832	0.881668
	0.089072	0.695692	0.611627	0.572958	0.564585	0.597998	0.572334	0.611594	0.537786	0.750094	0.588264	0.558063	0.832303			61.048	0.723985	0.126083	0.576717	0.76405	0.581536	0.842499	0.769598	0.640232	0.893265
	0.088551	0.706728	0.624308	0.593314	0.54154	0.625874	0.596396	0.603688	0.532231	0.762247	0.586761	0.555953	0.816924			61.574	0.725245	0.123364	0.578548	0.770852	0.600518	0.831243	0.758581	0.634191	0.902778
	0.084593	0.681063	0.645485	0.587624	0.540147	0.631888	0.6042	0.588697	0.526932	0.747421	0.59283	0.561632	0.81245			62.1	0.732288	0.1339	0.578067	0.741083	0.591614	0.844232	0.792287	0.645703	0.933026
	0.084841	0.672768	0.627509	0.560184	0.539474	0.622677	0.613471	0.584164	0.544779	0.750216	0.587516	0.544866	0.808811			62.627	0.736852	0.140224	0.578013	0.753582	0.596193	0.856832	0.787696	0.635607	0.950043
	0.08789	0.649346	0.615913	0.553975	0.526338	0.619254	0.613918	0.578359	0.546504	0.763006	0.575586	0.548207	0.810625			63.153	0.746429	0.143468	0.592018	0.744806	0.598123	0.863187	0.796737	0.653706	0.976424
	0.089718	0.663252	0.60727	0.558496	0.510741	0.665665	0.592256	0.577679	0.558029	0.754331	0.555034	0.544829	0.80592			63.679	0.741546	0.139585	0.572325	0.714156	0.623085	0.837327	0.816635	0.658283	0.969012
	0.087334	0.672668	0.610826	0.54426	0.537458	0.681674	0.602893	0.58552	0.578616	0.758437	0.558161	0.550863	0.80411			64.205	0.748535	0.143318	0.580653	0.72649	0.6219	0.87783	0.805248	0.655578	0.972048
	0.092729	0.65247	0.607811	0.532362	0.530919	0.687734	0.598424	0.608693	0.561099	0.749617	0.532706	0.550412	0.819644			64.732	0.746975	0.139121	0.578008	0.724046	0.633542	0.869756	0.793694	0.660452	0.969328
	0.091231	0.669452	0.635366	0.53074	0.549238	0.681892	0.602666	0.594587	0.588004	0.75283	0.533881	0.555877	0.823552			65.258	0.74271	0.139875	0.576306	0.706112	0.637901	0.846559	0.799142	0.654419	0.978531
	0.091933	0.67015	0.668308	0.543376	0.542613	0.686489	0.591721	0.615344	0.577528	0.781795	0.555334	0.552474	0.810568			65.784	0.741407	0.147998	0.566855	0.69322	0.662584	0.838236	0.802996	0.627231	0.998725
	0.096103	0.644326	0.653342	0.530011	0.530599	0.684114	0.612819	0.632676	0.591172	0.784798	0.531876	0.552739	0.821508			66.311	0.746634	0.138241	0.572093	0.713922	0.657284	0.834384	0.799469	0.662649	0.986635
	0.093833	0.663306	0.653463	0.546874	0.537455	0.694417	0.619845	0.636015	0.584919	0.781303	0.535285	0.539734	0.813188			66.837	0.744257	0.138495	0.571073	0.703128	0.663266	0.818149	0.8213	0.650573	0.982309
	0.096838	0.650071	0.653468	0.535822	0.53617	0.684759	0.631534	0.614063	0.589748	0.792499	0.533452	0.547295	0.822789			67.363	0.755099	0.147822	0.567428	0.706231	0.695803	0.826879	0.834803	0.642801	1.01175
	0.097178	0.655728	0.624407	0.547101	0.545984	0.721068	0.626388	0.598099	0.591725	0.756087	0.51813	0.540254	0.834935			67.889	0.75362	0.154239	0.551149	0.703979	0.719785	0.808717	0.825805	0.636356	1.02955
	0.09514	0.61858	0.631028	0.550353	0.542099	0.743215	0.641929	0.594534	0.616377	0.764502	0.512791	0.551251	0.811549			68.416	0.739465	0.139661	0.556593	0.705716	0.696743	0.790434	0.803617	0.633376	0.989777
	0.092132	0.619085	0.645345	0.571605	0.537434	0.777354	0.644786	0.585831	0.609874	0.753712	0.523592	0.571571	0.794859			68.942	0.745136	0.135557	0.569463	0.717174	0.696842	0.809716	0.799196	0.638141	0.985422
	0.091294	0.628087	0.665142	0.593334	0.561357	0.786742	0.63661	0.591493	0.59016	0.759886	0.526985	0.576931	0.798568			69.468	0.747423	0.139737	0.570831	0.727424	0.696274	0.825299	0.779009	0.634444	0.998681
	0.095823	0.639942	0.665676	0.599185	0.562506	0.773705	0.653063	0.590355	0.581133	0.760546	0.52157	0.56307	0.825698			69.994	0.749349	0.137984	0.573444	0.715343	0.698499	0.810258	0.789403	0.65393	1.00456
	0.096666	0.637677	0.664144	0.587709	0.549684	0.782549	0.664443	0.575232	0.591894	0.771908	0.520793	0.553993	0.797796			70.521	0.756196	0.135563	0.577505	0.732612	0.707549	0.813756	0.78789	0.666701	1.00736
	0.103236	0.670128	0.661671	0.601307	0.557042	0.815064	0.670839	0.551916	0.589723	0.779066	0.514818	0.554971	0.794601			71.047	0.759299	0.136293	0.572828	0.744266	0.705182	0.816897	0.836554	0.650935	0.988429
	0.10541	0.676927	0.701686	0.597979	0.55605	0.821926	0.678615	0.573068	0.597683	0.778718	0.512453	0.556138	0.805676			71.573	0.75964	0.12075	0.585813	0.735864	0.704983	0.835355	0.844681	0.670183	0.940603
	0.107256	0.651018	0.70226	0.606676	0.546868	0.816596	0.669891	0.577159	0.608199	0.79999	0.502609	0.551899	0.799456			72.1	0.767912	0.123226	0.585444	0.758445	0.731692	0.838337	0.825842	0.670985	0.96464
	0.106764	0.662435	0.731307	0.59102	0.549486	0.807167	0.682611	0.552405	0.593236	0.773336	0.51665	0.554995	0.806662			72.626	0.767875	0.131996	0.598545	0.757521	0.696083	0.848436	0.85195	0.648084	0.974504
	0.108053	0.661442	0.689276	0.59169	0.554257	0.834465	0.6849	0.580779	0.577917	0.788437	0.515937	0.561057	0.805179			73.152	0.761042	0.129319	0.58758	0.763597	0.687149	0.823802	0.852052	0.650963	0.962152
	0.102369	0.642743	0.69844	0.595178	0.547678	0.788561	0.672803	0.565597	0.599705	0.792041	0.501664	0.567768	0.795503			73.678	0.766327	0.135597	0.589416	0.759727	0.681379	0.838804	0.862363	0.654604	0.977996
	0.104175	0.626269	0.694845	0.598764	0.536708	0.799781	0.662083	0.556233	0.587729	0.784957	0.512856	0.564065	0.798917			74.205	0.769749	0.128976	0.606052	0.764935	0.68543	0.849057	0.862695	0.655594	0.964479
	0.104085	0.641787	0.696556	0.572714	0.53845	0.792172	0.682859	0.570235	0.58578	0.774973	0.50113	0.563841	0.798599			74.731	0.767635	0.128487	0.599453	0.770581	0.680351	0.857253	0.88053	0.649261	0.936016
	0.106237	0.641453	0.705295	0.584353	0.519208	0.784322	0.692062	0.569545	0.5731	0.778436	0.497497	0.561129	0.793489			75.257	0.770302	0.129732	0.613169	0.764049	0.681152	0.85675	0.894462	0.642042	0.940492
	0.105806	0.663206	0.693002	0.600055	0.52415	0.802736	0.688891	0.579521	0.551854	0.785987	0.498471	0.573474	0.777845			75.784	0.771012	0.130361	0.601069	0.761976	0.68046	0.85934	0.899389	0.657559	0.93729
	0.105788	0.692902	0.685057	0.593507	0.528231	0.800844	0.695639	0.595987	0.572759	0.802772	0.50698	0.578178	0.789608			76.31	0.769897	0.139782	0.58777	0.753929	0.696429	0.851093	0.903527	0.636478	0.960055
	0.103098	0.673043	0.690166	0.590059	0.525713	0.78467	0.694555	0.591532	0.59139	0.805286	0.502281	0.570206	0.778299			76.836	0.770279	0.136094	0.592426	0.769711	0.690365	0.845055	0.896409	0.64094	0.957049
	0.102028	0.636389	0.702681	0.597564	0.515263	0.788378	0.676363	0.591015	0.599296	0.798447	0.505685	0.571227	0.775809			77.362	0.770304	0.124568	0.597862	0.785205	0.703396	0.830295	0.872338	0.655383	0.94765
	0.101473	0.627716	0.699172	0.596606	0.53106	0.790001	0.681634	0.598991	0.6099	0.80825	0.519971	0.577661	0.796547			77.889	0.772046	0.135365	0.590699	0.779754	0.707446	0.83811	0.887756	0.636761	0.963796
	0.103494	0.639489	0.672197	0.590704	0.521782	0.824867	0.692364	0.598048	0.60833	0.795258	0.533059	0.577493	0.79355			78.415	0.770632	0.136949	0.594605	0.780376	0.701787	0.837444	0.886493	0.627378	0.966337
	0.10179	0.630509	0.701119	0.611047	0.536319	0.817166	0.714056	0.60151	0.607729	0.788562	0.51242	0.59506	0.792028			78.941	0.771152	0.125124	0.605051	0.778393	0.705132	0.851342	0.855457	0.64874	0.953946
	0.103782	0.631821	0.693011	0.60873	0.520837	0.828007	0.685871	0.604703	0.617486	0.786651	0.50226	0.586889	0.782452			79.467	0.76803	0.130826	0.59202	0.792556	0.719368	0.847392	0.854601	0.620264	0.950007
	0.111958	0.630358	0.69921	0.632547	0.503528	0.838989	0.680559	0.596467	0.603581	0.803645	0.500712	0.573775	0.792114			79.994	0.776764	0.129376	0.591915	0.787854	0.750136	0.854104	0.847735	0.639932	0.965672
	0.111693	0.655737	0.70642	0.620456	0.521764	0.840444	0.690648	0.628145	0.617296	0.802749	0.483552	0.573502	0.798137			80.52	0.772892	0.125815	0.585959	0.800132	0.728539	0.86688	0.829748	0.651438	0.947551
	0.113363	0.660111	0.717495	0.642674	0.514225	0.820209	0.690983	0.630843	0.600672	0.814265	0.486327	0.579674	0.819263			81.046	0.771897	0.121822	0.577248	0.806391	0.761188	0.850548	0.834106	0.646642	0.927157
	0.118398	0.657676	0.721569	0.633719	0.508554	0.860869	0.682613	0.641583	0.605475	0.804435	0.48134	0.582344	0.8158			81.573	0.771481	0.122482	0.578546	0.804888	0.765214	0.841288	0.828515	0.644759	0.937155
	0.114249	0.646961	0.716585	0.682073	0.523145	0.879938	0.690761	0.632754	0.631377	0.779323	0.487254	0.595654	0.815083			82.099	0.773266	0.125231	0.576533	0.786947	0.779258	0.843352	0.851945	0.639653	0.935176
	0.110483	0.665665	0.732723	0.663742	0.528246	0.854	0.673372	0.640265	0.598587	0.795855	0.489733	0.59632	0.798722			82.625	0.780667	0.123905	0.581174	0.801697	0.799253	0.841322	0.862956	0.646069	0.932202
	0.117309	0.657622	0.740072	0.687639	0.510876	0.854715	0.691777	0.622978	0.601728	0.812578	0.472412	0.604003	0.794493			83.151	0.783408	0.125936	0.576261	0.803373	0.798741	0.838129	0.851229	0.661763	0.954361
	0.118217	0.655835	0.740718	0.693928	0.497958	0.851964	0.657819	0.622998	0.615911	0.800885	0.467504	0.616105	0.807592			83.678	0.784065	0.123844	0.575281	0.796996	0.819508	0.840895	0.835393	0.669155	0.951224
	0.11518	0.653385	0.750506	0.689864	0.510307	0.842952	0.665485	0.661929	0.61123	0.799267	0.457397	0.608399	0.788832			84.204	0.786883	0.126562	0.582169	0.79988	0.817235	0.842237	0.872715	0.651242	0.942704
	0.116023	0.65376	0.742735	0.685168	0.490657	0.838209	0.671246	0.672751	0.623548	0.803106	0.470083	0.602361	0.802012			84.73	0.792451	0.125629	0.583711	0.815161	0.800973	0.830649	0.895636	0.673077	0.947948
	0.106551	0.634481	0.712822	0.651287	0.495373	0.845128	0.680534	0.697994	0.602344	0.793707	0.53155	0.602709	0.795716			85.256	0.794729	0.125519	0.586646	0.803863	0.840356	0.838916	0.876948	0.666781	0.949594
	0.104788	0.654192	0.700993	0.672396	0.486221	0.835761	0.679378	0.670499	0.605998	0.76592	0.521262	0.609346	0.808574			85.783	0.781774	0.122816	0.575843	0.801414	0.818493	0.832704	0.870377	0.652879	0.920709
	0.104784	0.63859	0.703769	0.67196	0.506637	0.829039	0.685614	0.683246	0.578819	0.763986	0.514132	0.594328	0.809224			86.309	0.791251	0.123722	0.57666	0.839806	0.81578	0.844446	0.898045	0.662786	0.901236
	0.100958	0.631366	0.689156	0.684642	0.512227	0.821101	0.675221	0.676105	0.586026	0.787907	0.51866	0.610212	0.792763			86.835	0.788995	0.122068	0.581042	0.807381	0.799371	0.842047	0.919663	0.673121	0.90034
	0.103359	0.640991	0.698378	0.66565	0.516177	0.842144	0.670308	0.667781	0.585424	0.786842	0.529689	0.589111	0.795449			87.361	0.789517	0.130458	0.580714	0.819422	0.808347	0.829822	0.926632	0.645391	0.91629
	0.103269	0.623422	0.704909	0.670856	0.503999	0.818232	0.660544	0.658242	0.579226	0.777019	0.524184	0.587844	0.80351			87.888	0.792053	0.138674	0.579615	0.808274	0.812337	0.844685	0.911184	0.631953	0.956322
	0.093559	0.633842	0.695132	0.665463	0.525843	0.80561	0.682839	0.653553	0.593757	0.769024	0.544483	0.584272	0.798961			88.414	0.795294	0.143748	0.585753	0.802626	0.808768	0.830596	0.921384	0.632446	0.985489
	0.09998	0.622365	0.71402	0.689034	0.503866	0.806983	0.661375	0.672259	0.577369	0.787724	0.572745	0.554357	0.789666			88.94	0.785495	0.14197	0.588677	0.811428	0.788327	0.810235	0.92518	0.612118	0.962502
	0.098613	0.613034	0.700593	0.686785	0.501936	0.817123	0.660073	0.669646	0.574785	0.785901	0.572131	0.565274	0.773252			89.467	0.784517	0.134451	0.588581	0.822245	0.809682	0.836801	0.894993	0.607431	0.931884
	0.090944	0.629852	0.688643	0.693428	0.533	0.803582	0.665765	0.666293	0.558101	0.779432	0.616266	0.546424	0.769226			89.993	0.792213	0.134688	0.606674	0.839561	0.818572	0.823072	0.895381	0.608427	0.953802
	0.082928	0.603602	0.665994	0.683778	0.542794	0.799918	0.652246	0.658718	0.591404	0.780961	0.617931	0.578372	0.763687			90.519	0.804187	0.13941	0.608231	0.844426	0.829373	0.829294	0.93716	0.621198	0.959626
	0.091932	0.595958	0.669515	0.693623	0.518399	0.815665	0.659159	0.652078	0.584191	0.784926	0.602567	0.568002	0.761			91.046	0.797711	0.129221	0.614542	0.849516	0.812362	0.813988	0.91199	0.632172	0.949405
	0.08514	0.586347	0.681316	0.667706	0.519695	0.791254	0.644522	0.636882	0.590926	0.775256	0.633913	0.566503	0.755126			91.572	0.793852	0.132156	0.61508	0.817443	0.806304	0.807289	0.937868	0.626662	0.946321
	0.087804	0.591928	0.678539	0.689671	0.525091	0.796597	0.630743	0.65346	0.593499	0.789285	0.641819	0.566956	0.765194			92.098	0.802615	0.127824	0.620175	0.834132	0.835679	0.812179	0.934801	0.640983	0.940357
	0.08644	0.591385	0.661384	0.68809	0.536541	0.778515	0.623173	0.656266	0.564037	0.789356	0.654316	0.563397	0.764538			92.624	0.791618	0.122909	0.624455	0.819658	0.843117	0.801565	0.91925	0.622381	0.9109
	0.079578	0.600952	0.685792	0.677748	0.522764	0.769174	0.617591	0.645961	0.561484	0.778649	0.659022	0.592476	0.728102			93.151	0.79173	0.116872	0.629746	0.817012	0.847991	0.812045	0.901891	0.628671	0.904754
	0.080841	0.588428	0.691184	0.689606	0.540203	0.791406	0.624459	0.672322	0.562489	0.766291	0.666244	0.570889	0.716807			93.677	0.800509	0.123333	0.635392	0.828819	0.861061	0.816085	0.90792	0.624397	0.929888
	0.087961	0.575577	0.690009	0.67509	0.518763	0.776948	0.596197	0.666679	0.553781	0.770402	0.637387	0.559024	0.743535			94.203	0.800318	0.123049	0.627112	0.831584	0.858175	0.828208	0.91764	0.628138	0.911367
	0.089593	0.574656	0.702488	0.665222	0.518321	0.764027	0.599114	0.676198	0.558773	0.79475	0.640138	0.565998	0.747942			94.729	0.793224	0.12459	0.620698	0.835704	0.871063	0.805173	0.917245	0.616295	0.88639
	0.095071	0.567143	0.711496	0.650007	0.507194	0.768315	0.594	0.661547	0.552936	0.796312	0.660243	0.570334	0.767643			95.256	0.7998	0.122171	0.627174	0.843153	0.870668	0.808782	0.927037	0.631365	0.890419
	0.087873	0.577177	0.701036	0.63645	0.536569	0.751269	0.567497	0.657571	0.541506	0.790434	0.659451	0.570757	0.746626			95.782	0.805423	0.119721	0.638302	0.838053	0.88811	0.820237	0.926872	0.637435	0.888953
	0.090138	0.565888	0.716888	0.668385	0.525235	0.744507	0.585707	0.672899	0.541245	0.784999	0.663919	0.586483	0.768753			96.308	0.819038	0.118217	0.639319	0.841681	0.899048	0.842692	0.922735	0.667282	0.920511
	0.086965	0.573222	0.707282	0.630068	0.541358	0.742561	0.579957	0.660249	0.554458	0.802283	0.669892	0.587487	0.757788			96.834	0.820019	0.118067	0.636071	0.840178	0.917029	0.847096	0.906034	0.672805	0.92092
	0.089928	0.582013	0.73571	0.612816	0.538687	0.781265	0.591538	0.671133	0.552362	0.788508	0.695229	0.597491	0.74657			97.361	0.833467	0.128112	0.64092	0.860644	0.929647	0.861551	0.923039	0.665312	0.953153
	0.086955	0.568873	0.715927	0.636447	0.538831	0.764236	0.600681	0.674452	0.551848	0.797935	0.665907	0.608585	0.753093			97.887	0.831113	0.129457	0.638451	0.844543	0.915728	0.857381	0.938463	0.664777	0.95845
	0.083044	0.578889	0.709549	0.639971	0.546351	0.777257	0.589401	0.665473	0.584577	0.796035	0.686588	0.611374	0.746552			98.413	0.825468	0.133785	0.648461	0.810927	0.92503	0.845293	0.958493	0.643389	0.946685
	0.082498	0.574996	0.715227	0.646986	0.532243	0.759769	0.602648	0.687067	0.581542	0.804396	0.701044	0.623298	0.724656			98.939	0.832371	0.134739	0.656407	0.832986	0.925984	0.852164	0.978882	0.642157	0.938018
	0.088811	0.545587	0.702274	0.631343	0.545736	0.7791	0.584931	0.670883	0.597628	0.824736	0.709428	0.627846	0.719955			99.466	0.828687	0.134344	0.648136	0.81827	0.919366	0.85435	0.977983	0.647088	0.935615
	0.089433	0.551444	0.730722	0.642724	0.541584	0.752837	0.595891	0.668645	0.586013	0.836387	0.706809	0.629138	0.727424			99.992	0.824416	0.126232	0.657202	0.81743	0.912103	0.855248	0.954785	0.647121	0.927022
	0.086623	0.54494	0.736547	0.661481	0.532825	0.751892	0.595644	0.644914	0.609906	0.814911	0.705369	0.641267	0.736132			100.518	0.829061	0.127561	0.673022	0.804327	0.918935	0.850974	0.94458	0.648179	0.963412
	0.080591	0.576914	0.736321	0.663115	0.548134	0.709283	0.610889	0.661842	0.606382	0.83658	0.700616	0.646042	0.741207			101.045	0.834379	0.123862	0.683169	0.830637	0.902433	0.85257	0.941158	0.653968	0.976715
	0.089575	0.540294	0.747057	0.683925	0.535534	0.729025	0.596311	0.674669	0.579144	0.823627	0.704277	0.645486	0.73927			101.571	0.839004	0.11964	0.687369	0.836149	0.922275	0.848692	0.946675	0.668971	0.962896
	0.085298	0.545954	0.722018	0.688812	0.56545	0.707397	0.594111	0.668845	0.58819	0.818488	0.698625	0.664304	0.78795			102.097	0.833852	0.10969	0.6863	0.850533	0.915858	0.852855	0.924235	0.675032	0.932154
	0.079682	0.556373	0.737115	0.6818	0.575358	0.69582	0.607956	0.656811	0.572052	0.807083	0.720024	0.667553	0.758013			102.623	0.841837	0.112608	0.694152	0.853076	0.933749	0.834602	0.940615	0.686453	0.950211
	0.074749	0.570634	0.727042	0.682431	0.570163	0.711105	0.618207	0.646669	0.585977	0.79686	0.710505	0.661623	0.761826			103.15	0.829293	0.109953	0.680102	0.856829	0.929611	0.832361	0.892479	0.675596	0.938072
	0.078172	0.568398	0.72523	0.695272	0.559726	0.709722	0.614069	0.659534	0.571338	0.7941	0.730573	0.674792	0.756226			103.676	0.831142	0.105496	0.679551	0.851926	0.924261	0.83237	0.910212	0.692507	0.927165
	0.070407	0.582955	0.723558	0.69154	0.575738	0.690972	0.623405	0.643134	0.575403	0.796278	0.70586	0.679294	0.74171			104.202	0.836441	0.103712	0.687274	0.861136	0.924548	0.825553	0.940224	0.704671	0.911679
	0.074118	0.583743	0.726286	0.678226	0.582369	0.699342	0.629491	0.675947	0.567543	0.80615	0.701266	0.686401	0.768002			104.729	0.835032	0.104127	0.674894	0.87375	0.91013	0.840648	0.919533	0.703268	0.922998
	Date: 1/5/2022															Date: 29/4/2022
	Export: Mobile Fraction | T-half | R-square															Export: Mobile Fraction | T-half | R-square
	Prebleach Values: 1															Prebleach Values: 1
	Bleach Values: 0															Bleach Values: 0
	Postbleach Values: 199															Postbleach Values: 199
	Initial Deleted Values: 0															Initial Deleted Values: 0
	Normalization Method: FullScale															Normalization Method: FullScale
	Exponential Equation: Single															Exponential Equation: Double
	filename	T-half	Mobile Fraction	R square												filename	T-half	Mobile Fraction	R square
	20220119_1.xlsx	7.31	0.79	0.9												20220120_1.xlsx	34.21	1	0.98
	20220119_2.xlsx	26.35	0.86	0.91												20220120_2.xlsx	18.74	1	0.99
	20220120_3.xlsx	5.65	0.78	0.91												20220120_3.xlsx	20.33	1	0.91
	20220120_4.xlsx	4.93	0.75	0.94												20220120_4.xlsx	14.82	0.86	0.98
	20220120_6.xlsx	18.92	0.91	0.87												20220121_5.xlsx	26.79	0.97	0.96
	20220120_7.xlsx	9.72	0.79	0.93												20220121_6.xlsx	15.67	0.69	0.99
	20220120_8.xlsx	16.39	0.78	0.96												20220121_8.xlsx	14.62	0.98	0.97
	20220121_10.xlsx	10.12	0.77	0.95												Mean:	20.74	0.93
	20220121_12.xlsx	14.29	0.87	0.98												Standard Deviation:	6.77	0.11
	20220121_13.xlsx	6.5	0.72	0.81
	20220121_14.xlsx	7.94	0.76	0.93
	20220121_9.xlsx	8.3	0.9	0.98
	Mean:	11.37	0.81
	Standard Deviation:	6.16	0.06

## Sheet: B
	Rtnl1-GFP_UbcH10C114S
	centrosome																									equator
	Time (seconds)	Mean Values	Standard Deviation	10.xlsx	11.xlsx	12.xlsx	20211118_1.xlsx	20211118_13.xlsx	20211118_15.xlsx	20211118_16.xlsx	20211118_17.xlsx	20211118_2.xlsx	20211118_3.xlsx	20211118_4.xlsx	20211118_6.xlsx	20211213_18.xlsx	20211213_19.xlsx	20211213_20.xlsx	20211222_21.xlsx	20211222_22.xlsx	20211222_23.xlsx	7.xlsx	8.xlsx			Time (seconds)	Mean Values	Standard Deviation	20211118_1.xlsx	20211118_2.xlsx	20211118_3.xlsx	20211118_6.xlsx	20211118_7.xlsx	20211118_8.xlsx	20211213_10.xlsx	20211213_11.xlsx	20211213_12.xlsx	20211222_13.xlsx	20211222_14.xlsx	20211222_15.xlsx
	0	1	0	1	1	1	1	1	1	1	1	1	1	1	1	1	1	1	1	1	1	1	1			0	1	0	1	1	1	1	1	1	1	1	1	1	1	1
	0.533	0	0	0	0	0	0	0	0	0	0	0	0	0	0	0	0	0	0	0	0	0	0			0.533	0	0	0	0	0	0	0	0	0	0	0	0	0	0
	1.066	0.015773	0.007168	0.020024	0.001696	0.028122	0.008372	0.019651	0.027329	0.011201	0.002173	0.015995	0.0197	0.017953	0.010503	0.014977	0.00861	0.016346	0.014957	0.014535	0.021659	0.018575	0.023073			1.066	0.013601	0.011592	-0.002752	0.034227	0.006485	0.024816	0.021968	0.012968	0.009897	0.022625	0.010434	0.004133	-0.00314	0.021556
	1.599	0.059658	0.01662	0.074954	0.025839	0.078552	0.038607	0.057055	0.064291	0.050489	0.04148	0.057626	0.050905	0.060008	0.052919	0.091754	0.054163	0.053137	0.046275	0.075313	0.063113	0.066842	0.089842			1.599	0.065403	0.011505	0.076126	0.084484	0.076019	0.054305	0.06689	0.053414	0.051875	0.068593	0.061836	0.07906	0.052226	0.060013
	2.132	0.099715	0.025996	0.132166	0.045215	0.117917	0.066456	0.088418	0.112892	0.072139	0.053143	0.094576	0.09681	0.114871	0.109485	0.145521	0.09584	0.088966	0.089922	0.118283	0.111092	0.111848	0.128744			2.131	0.10209	0.026524	0.106297	0.172078	0.118174	0.083499	0.095045	0.058555	0.088366	0.103764	0.099895	0.097984	0.09539	0.106038
	2.666	0.135164	0.033981	0.19475	0.07137	0.153791	0.088256	0.125476	0.150988	0.104018	0.079956	0.124575	0.131704	0.142812	0.136474	0.210235	0.128699	0.12152	0.134936	0.146752	0.137881	0.155575	0.163518			2.664	0.1303	0.023611	0.147005	0.189328	0.144433	0.117125	0.117356	0.097856	0.118185	0.120025	0.120349	0.118166	0.146642	0.127134
	3.199	0.168841	0.037716	0.242466	0.092144	0.189763	0.130226	0.172543	0.171259	0.132264	0.108245	0.151401	0.170071	0.17944	0.166232	0.249574	0.168647	0.152623	0.159869	0.186887	0.167706	0.190343	0.195112			3.197	0.17004	0.031516	0.204638	0.23665	0.204447	0.170306	0.146357	0.137207	0.145352	0.158029	0.160379	0.131269	0.180071	0.165777
	3.732	0.195279	0.04536	0.281111	0.108057	0.203687	0.14533	0.187517	0.20616	0.154342	0.130831	0.174288	0.232868	0.198527	0.207366	0.296937	0.194873	0.168407	0.177268	0.194471	0.191237	0.215434	0.236865			3.73	0.192775	0.036149	0.240516	0.269482	0.210731	0.173205	0.184828	0.139262	0.178849	0.167869	0.186402	0.154802	0.208378	0.198981
	4.265	0.224316	0.048604	0.309065	0.112956	0.230685	0.161687	0.214395	0.245456	0.195505	0.162691	0.219798	0.257867	0.242575	0.237013	0.333765	0.21502	0.194721	0.2121	0.225333	0.215826	0.254863	0.244998			4.263	0.213893	0.035194	0.25043	0.298474	0.218487	0.183232	0.181088	0.186197	0.203153	0.215798	0.206073	0.184806	0.244411	0.194565
	4.798	0.249725	0.049466	0.338737	0.138413	0.260621	0.208562	0.238086	0.249043	0.203497	0.190363	0.242484	0.297508	0.253735	0.272806	0.36461	0.239267	0.218205	0.238955	0.246774	0.243928	0.275045	0.27386			4.796	0.246499	0.047578	0.290512	0.360497	0.253207	0.211664	0.200304	0.224088	0.226592	0.237934	0.256422	0.180591	0.27921	0.236963
	5.331	0.271887	0.0528	0.362707	0.161542	0.269759	0.217779	0.266231	0.283282	0.221748	0.208505	0.275617	0.328462	0.269461	0.300449	0.392435	0.263972	0.242809	0.236285	0.258027	0.271988	0.304869	0.301813			5.329	0.278198	0.063371	0.325486	0.455023	0.302181	0.235468	0.24407	0.24724	0.246956	0.254904	0.267952	0.23306	0.294844	0.231195
	5.864	0.294752	0.052878	0.384893	0.191277	0.298091	0.238806	0.292434	0.30159	0.23434	0.227635	0.284239	0.347782	0.294368	0.32787	0.419092	0.289208	0.261005	0.276052	0.283733	0.293462	0.319863	0.329293			5.862	0.295494	0.053384	0.332832	0.435558	0.314847	0.249521	0.252213	0.25108	0.259924	0.273675	0.291694	0.261367	0.328379	0.294842
	6.397	0.30875	0.057634	0.411807	0.193369	0.326254	0.238167	0.302591	0.30821	0.251523	0.242308	0.303814	0.36967	0.317818	0.355285	0.436584	0.294568	0.279766	0.276859	0.287293	0.313411	0.324607	0.341091			6.394	0.320162	0.057529	0.352299	0.4666	0.355722	0.261991	0.25667	0.317879	0.271945	0.307826	0.29566	0.287774	0.353094	0.314483
	6.93	0.329353	0.059064	0.428533	0.200367	0.341414	0.260913	0.326056	0.33825	0.280598	0.251353	0.321867	0.387256	0.323648	0.395185	0.450529	0.325352	0.296926	0.312239	0.306191	0.319048	0.359317	0.362028			6.927	0.341939	0.049432	0.391023	0.453945	0.380181	0.301219	0.297171	0.323912	0.297813	0.335474	0.310051	0.305598	0.384126	0.322754
	7.464	0.348412	0.061788	0.444155	0.209892	0.366004	0.284116	0.320225	0.353492	0.286444	0.285347	0.345423	0.411588	0.334816	0.423876	0.478545	0.338327	0.320047	0.323623	0.328437	0.34835	0.38473	0.380811			7.46	0.358229	0.051821	0.417205	0.478202	0.387171	0.335373	0.320393	0.336048	0.304921	0.353319	0.320337	0.301606	0.387783	0.356396
	7.997	0.36824	0.060805	0.461538	0.229231	0.384089	0.302334	0.343273	0.388414	0.305047	0.294964	0.371386	0.417659	0.360393	0.438356	0.480962	0.350095	0.330731	0.340369	0.363468	0.372943	0.40462	0.424933			7.993	0.381043	0.050163	0.386778	0.504859	0.430797	0.34015	0.360196	0.401367	0.33549	0.370974	0.333733	0.332723	0.403247	0.372206
	8.53	0.380827	0.061071	0.466404	0.247759	0.399925	0.306487	0.360641	0.384194	0.310993	0.306151	0.379135	0.442085	0.367136	0.446107	0.501458	0.367755	0.342739	0.365323	0.379572	0.38926	0.417485	0.435922			8.526	0.39192	0.048944	0.449705	0.48824	0.456933	0.350771	0.359676	0.355494	0.352885	0.379048	0.349814	0.357183	0.418817	0.384474
	9.063	0.395937	0.062432	0.482341	0.252522	0.422957	0.323401	0.385736	0.398999	0.323038	0.314145	0.402196	0.459121	0.384435	0.454159	0.518057	0.37861	0.364114	0.371737	0.399577	0.410527	0.432956	0.440116			9.059	0.405986	0.034486	0.406816	0.493041	0.442851	0.371776	0.386041	0.409286	0.376036	0.404669	0.378288	0.377566	0.412487	0.412979
	9.596	0.411785	0.0654	0.498531	0.278386	0.436842	0.325337	0.404404	0.419117	0.348352	0.325904	0.409491	0.464271	0.392865	0.497576	0.54967	0.386193	0.370162	0.386453	0.429435	0.406136	0.449455	0.457115			9.592	0.420194	0.036909	0.428651	0.501119	0.472097	0.373533	0.402268	0.424865	0.38518	0.420891	0.397118	0.384571	0.4208	0.431231
	10.129	0.427672	0.067289	0.519106	0.294497	0.469123	0.335536	0.415849	0.439692	0.368242	0.328917	0.422197	0.489626	0.427482	0.506158	0.562005	0.398932	0.382118	0.397683	0.434036	0.421442	0.453796	0.487009			10.125	0.436079	0.053043	0.464419	0.571845	0.488204	0.393206	0.413111	0.422948	0.387699	0.421823	0.408258	0.382897	0.451362	0.427179
	10.662	0.4415	0.068428	0.522425	0.31097	0.490776	0.351647	0.443459	0.445109	0.369962	0.346932	0.442796	0.50211	0.429911	0.532357	0.57929	0.405692	0.387923	0.409686	0.4481	0.434783	0.478988	0.497088			10.658	0.452876	0.057799	0.477058	0.600086	0.501115	0.376962	0.419366	0.454679	0.417996	0.427164	0.43092	0.403866	0.47537	0.449927
	11.195	0.454529	0.063812	0.508306	0.341054	0.520073	0.373448	0.44529	0.464111	0.383023	0.369244	0.435933	0.513956	0.440848	0.533292	0.595353	0.426293	0.398863	0.427862	0.469928	0.460974	0.476102	0.506622			11.191	0.466563	0.05071	0.497919	0.589818	0.51953	0.412304	0.420749	0.478275	0.438789	0.457546	0.441148	0.416307	0.469467	0.456907
	11.729	0.462681	0.070173	0.511794	0.327009	0.531801	0.387207	0.465419	0.482904	0.381309	0.362363	0.45458	0.5155	0.437649	0.568449	0.612066	0.434454	0.415694	0.428227	0.470971	0.460725	0.483928	0.521564			11.724	0.475982	0.057361	0.479457	0.622074	0.537178	0.403493	0.434639	0.481987	0.434851	0.464616	0.445371	0.442212	0.475983	0.489919
	12.262	0.477874	0.070321	0.538586	0.346713	0.526522	0.390605	0.480478	0.485295	0.401727	0.386561	0.452075	0.558328	0.453199	0.560968	0.635288	0.460198	0.418282	0.453011	0.493883	0.477605	0.49336	0.544789			12.256	0.49839	0.053101	0.509087	0.633841	0.540047	0.454117	0.46779	0.517904	0.440815	0.490789	0.457738	0.453619	0.520667	0.49427
	12.795	0.488059	0.074454	0.54472	0.351484	0.547775	0.405476	0.480961	0.485957	0.396474	0.386877	0.476297	0.533403	0.463995	0.594407	0.661954	0.471356	0.42878	0.465406	0.519961	0.484998	0.506523	0.554374			12.789	0.495094	0.046633	0.527355	0.607167	0.525629	0.434904	0.454751	0.496733	0.455132	0.511135	0.45203	0.485338	0.508319	0.482631
	13.328	0.497242	0.076974	0.558839	0.359302	0.554204	0.40824	0.51447	0.498135	0.401326	0.406602	0.457249	0.554965	0.469281	0.606363	0.676471	0.474601	0.436716	0.481602	0.528161	0.473771	0.518321	0.566216			13.322	0.510205	0.045191	0.555288	0.603813	0.55321	0.446895	0.48575	0.518614	0.472319	0.51349	0.470744	0.465461	0.519584	0.517294
	13.861	0.507649	0.07324	0.557077	0.367207	0.570386	0.437801	0.515897	0.516806	0.414695	0.422915	0.47276	0.535225	0.475522	0.633919	0.665241	0.498929	0.443667	0.485469	0.527387	0.495131	0.538461	0.578481			13.855	0.519595	0.045978	0.57551	0.618241	0.552644	0.457491	0.486127	0.515439	0.474994	0.515034	0.481253	0.496322	0.534602	0.527488
	14.394	0.513841	0.074742	0.572324	0.389166	0.563949	0.427297	0.510073	0.53315	0.427783	0.402752	0.491336	0.545461	0.478795	0.648571	0.678938	0.512308	0.451184	0.494402	0.532417	0.502229	0.544543	0.570151			14.388	0.528058	0.054122	0.585381	0.63376	0.595016	0.473151	0.47379	0.498368	0.481214	0.538145	0.484535	0.486779	0.536957	0.549602
	14.927	0.519785	0.072809	0.557058	0.401372	0.589061	0.428871	0.527537	0.546119	0.415224	0.424419	0.492976	0.557897	0.475814	0.64703	0.674775	0.511761	0.463271	0.51102	0.545242	0.510208	0.5494	0.566648			14.921	0.541854	0.051298	0.595833	0.641455	0.591675	0.47452	0.490085	0.554123	0.490968	0.549896	0.487335	0.525512	0.561047	0.539799
	15.46	0.52701	0.073874	0.560219	0.399444	0.595197	0.445932	0.531498	0.557816	0.427374	0.43262	0.482106	0.554893	0.487672	0.669407	0.678663	0.515259	0.464613	0.523019	0.55476	0.530328	0.563693	0.565678			15.454	0.554379	0.054514	0.593652	0.673199	0.603384	0.488861	0.516997	0.550647	0.492546	0.555049	0.507397	0.518318	0.59407	0.558433
	15.994	0.535602	0.072397	0.599971	0.41037	0.59946	0.456559	0.540577	0.555509	0.436049	0.432135	0.503493	0.581892	0.48181	0.663741	0.668962	0.520071	0.472161	0.540202	0.570887	0.53676	0.57863	0.562796			15.987	0.56182	0.060089	0.603441	0.708877	0.611681	0.506786	0.51022	0.541964	0.49919	0.569885	0.516648	0.537262	0.591201	0.54469
	16.527	0.543027	0.074153	0.604819	0.414452	0.616147	0.470276	0.570282	0.557581	0.441772	0.435676	0.480691	0.58595	0.496681	0.679424	0.670994	0.53282	0.484399	0.527846	0.586451	0.553858	0.580269	0.570151			16.52	0.563152	0.048349	0.621146	0.665137	0.580263	0.504622	0.527411	0.577442	0.502243	0.573281	0.522212	0.532596	0.573393	0.578081
	17.06	0.553276	0.068836	0.60597	0.427474	0.623272	0.474398	0.574501	0.579551	0.455903	0.455683	0.520095	0.594306	0.505561	0.667286	0.669894	0.540064	0.49475	0.541194	0.59805	0.557364	0.59332	0.586888			17.052	0.574966	0.048763	0.634279	0.659528	0.622421	0.509022	0.539212	0.576063	0.509306	0.594603	0.532829	0.55032	0.597919	0.574089
	17.593	0.556297	0.066674	0.603406	0.452754	0.638086	0.481961	0.578273	0.590113	0.464603	0.44643	0.511742	0.608032	0.517949	0.65906	0.669061	0.536321	0.495145	0.548627	0.595082	0.553087	0.582635	0.59357			17.585	0.578114	0.053305	0.628573	0.666027	0.629596	0.556549	0.484731	0.577335	0.511228	0.603533	0.524096	0.561384	0.60429	0.590026
	18.126	0.563336	0.066545	0.61495	0.461875	0.63972	0.505024	0.584099	0.587073	0.463331	0.452209	0.536564	0.58508	0.526941	0.661306	0.701248	0.545214	0.501284	0.548833	0.609748	0.579321	0.578925	0.583968			18.118	0.594937	0.056668	0.658358	0.705904	0.625665	0.526557	0.570818	0.594723	0.508276	0.620532	0.535511	0.592536	0.622867	0.577498
	18.659	0.569286	0.067735	0.599403	0.479624	0.646564	0.497232	0.595675	0.589904	0.466362	0.463682	0.545385	0.574953	0.519109	0.693087	0.705433	0.546604	0.517583	0.553032	0.61272	0.592218	0.60273	0.58443			18.651	0.601696	0.058139	0.653833	0.722915	0.64297	0.54121	0.535439	0.598276	0.535189	0.639704	0.5453	0.58919	0.627102	0.589224
	19.192	0.575235	0.067868	0.592807	0.473786	0.661244	0.520947	0.583758	0.61033	0.464518	0.467286	0.551948	0.607713	0.52814	0.684835	0.711573	0.552112	0.523587	0.563815	0.620026	0.580205	0.606925	0.59915			19.184	0.606332	0.060686	0.663348	0.727568	0.638653	0.510323	0.531971	0.598844	0.546821	0.636172	0.565722	0.608624	0.625472	0.622471
	19.725	0.578018	0.069852	0.590186	0.471709	0.666863	0.512426	0.585111	0.615381	0.459127	0.479718	0.547239	0.602943	0.529427	0.681406	0.723412	0.563244	0.526361	0.563241	0.625422	0.592891	0.621042	0.603208			19.717	0.611592	0.058413	0.683206	0.726512	0.647146	0.555342	0.537741	0.607912	0.532822	0.638527	0.569365	0.612437	0.631016	0.597083
	20.258	0.583005	0.068198	0.591852	0.48564	0.686324	0.516356	0.585045	0.626378	0.451774	0.489718	0.566579	0.595639	0.543507	0.666868	0.718358	0.570879	0.529781	0.567766	0.628884	0.594034	0.624003	0.620717			20.25	0.621827	0.053438	0.709397	0.70429	0.652597	0.556856	0.570955	0.610746	0.547891	0.665013	0.585332	0.608049	0.635045	0.615748
	20.791	0.591667	0.064811	0.616949	0.511867	0.676689	0.527494	0.589817	0.643534	0.478394	0.501845	0.551259	0.602189	0.541295	0.681861	0.728502	0.581179	0.54164	0.581792	0.645893	0.613677	0.60705	0.610417			20.782	0.628924	0.066563	0.722973	0.761633	0.675506	0.553767	0.586965	0.59582	0.553893	0.673848	0.591143	0.580092	0.633626	0.617824
	21.325	0.595335	0.069261	0.618566	0.503214	0.695189	0.542282	0.605072	0.638485	0.467132	0.496791	0.557233	0.601257	0.547252	0.683767	0.748142	0.586396	0.542822	0.603198	0.649223	0.601229	0.611886	0.607558			21.315	0.635105	0.052892	0.670319	0.740458	0.692501	0.577391	0.576292	0.592427	0.580098	0.680987	0.601022	0.632147	0.64881	0.628806
	21.858	0.599011	0.064262	0.616888	0.521605	0.696367	0.5478	0.602166	0.642354	0.49127	0.501948	0.572475	0.611383	0.54297	0.682805	0.740327	0.584542	0.553815	0.592975	0.655843	0.594961	0.604715	0.623016			21.848	0.649506	0.067156	0.733643	0.7841	0.714843	0.55915	0.590612	0.617486	0.588827	0.680406	0.609754	0.639228	0.659238	0.616789
	22.391	0.600352	0.065274	0.63427	0.504546	0.717302	0.550251	0.606	0.618099	0.510419	0.5003	0.5687	0.596421	0.552301	0.672627	0.746121	0.589605	0.55118	0.590921	0.651137	0.612181	0.605604	0.629056			22.381	0.646334	0.060754	0.743947	0.73968	0.687174	0.549441	0.590255	0.60946	0.5902	0.67388	0.602581	0.665066	0.66883	0.63549
	22.924	0.605191	0.064289	0.641729	0.519815	0.709684	0.563698	0.615449	0.622109	0.493557	0.516576	0.565466	0.615166	0.573106	0.687703	0.749339	0.582079	0.555965	0.590414	0.656064	0.61041	0.60889	0.626598			22.914	0.659816	0.065285	0.717282	0.798766	0.725111	0.57835	0.592188	0.638047	0.593074	0.693177	0.608627	0.65204	0.666785	0.65434
	23.457	0.611004	0.060122	0.64257	0.525072	0.706599	0.554311	0.628271	0.608902	0.511058	0.552408	0.580951	0.61016	0.57691	0.69087	0.737912	0.602532	0.552468	0.596352	0.684871	0.625196	0.605347	0.627321			23.447	0.665923	0.061246	0.760714	0.772283	0.706532	0.579205	0.612851	0.626752	0.608743	0.682975	0.607767	0.680644	0.682194	0.670417
	23.99	0.614966	0.059326	0.647164	0.517695	0.710847	0.570434	0.634032	0.61121	0.51406	0.556425	0.577751	0.626324	0.573482	0.694475	0.731977	0.604115	0.55512	0.608493	0.67185	0.640112	0.632775	0.620986			23.98	0.676507	0.065195	0.747178	0.813759	0.733642	0.595384	0.615081	0.661805	0.602872	0.689437	0.622294	0.697007	0.674739	0.664889
	24.523	0.620576	0.058453	0.646491	0.521209	0.709481	0.587487	0.644691	0.592858	0.51055	0.582144	0.62292	0.645719	0.576176	0.681236	0.74184	0.602137	0.556063	0.605378	0.680784	0.650384	0.619287	0.634685			24.513	0.678675	0.063699	0.757059	0.808079	0.735602	0.599226	0.640957	0.640713	0.612254	0.688278	0.613942	0.70187	0.677048	0.669065
	25.056	0.624676	0.059859	0.650964	0.515732	0.714367	0.577748	0.629408	0.610988	0.524977	0.571358	0.613863	0.655233	0.574826	0.676657	0.760488	0.614985	0.56648	0.624012	0.677253	0.65319	0.636188	0.64481			25.046	0.689717	0.070581	0.760752	0.851494	0.731735	0.611982	0.62964	0.662518	0.617203	0.724148	0.623163	0.703923	0.689002	0.671047
	25.59	0.633883	0.06452	0.648188	0.521927	0.726909	0.579707	0.652154	0.615648	0.513719	0.593018	0.653892	0.666858	0.577786	0.712702	0.769576	0.620876	0.565281	0.640935	0.687172	0.664572	0.629988	0.636745			25.579	0.692715	0.076813	0.757871	0.869348	0.741534	0.591924	0.624101	0.672736	0.624125	0.743208	0.628157	0.695006	0.691314	0.673252
	26.123	0.637996	0.063396	0.659042	0.523625	0.734247	0.598487	0.646826	0.642399	0.518276	0.581727	0.649157	0.652994	0.582278	0.72482	0.763298	0.639023	0.576349	0.636483	0.69706	0.65757	0.633214	0.643047			26.111	0.701521	0.07152	0.776938	0.857846	0.743379	0.603228	0.640237	0.698323	0.637042	0.740196	0.632421	0.700983	0.708238	0.679426
	26.656	0.639057	0.061607	0.64888	0.500205	0.740118	0.61016	0.656316	0.63747	0.518989	0.600654	0.644135	0.644625	0.623229	0.705877	0.754275	0.639214	0.581073	0.63844	0.698318	0.661159	0.632415	0.645598			26.644	0.70063	0.077771	0.802377	0.870162	0.752366	0.617457	0.669107	0.652184	0.613728	0.740392	0.634379	0.694919	0.687922	0.672569
	27.189	0.643695	0.064283	0.665373	0.512277	0.745648	0.602175	0.660902	0.67278	0.511234	0.604892	0.643734	0.642559	0.603927	0.711537	0.768326	0.651022	0.589189	0.638033	0.700749	0.66351	0.638737	0.647303			27.177	0.704535	0.06765	0.779051	0.855755	0.738234	0.629386	0.677065	0.700513	0.618458	0.748923	0.641696	0.699997	0.688289	0.67705
	27.722	0.650783	0.060388	0.66749	0.528407	0.750677	0.600161	0.674296	0.661078	0.531808	0.617863	0.651977	0.653809	0.640803	0.730199	0.760821	0.651946	0.586529	0.646355	0.700394	0.670018	0.641531	0.649501			27.71	0.717422	0.075026	0.787561	0.885125	0.744243	0.648935	0.678883	0.723585	0.617259	0.74871	0.628311	0.758694	0.703292	0.684469
	28.255	0.655799	0.063035	0.671689	0.519943	0.731956	0.617968	0.678455	0.675385	0.525462	0.611838	0.688906	0.659912	0.641472	0.746401	0.770467	0.65522	0.591218	0.654749	0.700018	0.682404	0.641621	0.650893			28.243	0.720134	0.065053	0.796997	0.857589	0.748067	0.662773	0.680804	0.73286	0.643826	0.748574	0.63233	0.743483	0.693458	0.700854
	28.788	0.660866	0.066343	0.678251	0.527972	0.75434	0.629027	0.69095	0.683648	0.528821	0.600032	0.693699	0.652918	0.614136	0.759223	0.765655	0.659086	0.597168	0.649733	0.722513	0.696921	0.651523	0.661706			28.776	0.719627	0.077422	0.784679	0.897661	0.756035	0.631909	0.661342	0.74094	0.639862	0.754911	0.633912	0.732152	0.726908	0.675218
	29.322	0.666827	0.06427	0.684179	0.54542	0.76498	0.632271	0.699811	0.681669	0.53231	0.615952	0.70134	0.661117	0.624556	0.768573	0.765734	0.658932	0.608972	0.6512	0.722227	0.693285	0.66017	0.663838			29.309	0.731627	0.078249	0.793232	0.892475	0.777436	0.658422	0.661615	0.746119	0.616468	0.771253	0.644411	0.7731	0.742365	0.702624
	29.855	0.671318	0.068678	0.673911	0.539427	0.763323	0.650854	0.709629	0.671231	0.52004	0.629137	0.709379	0.666965	0.622906	0.783982	0.780544	0.652297	0.612067	0.665755	0.737117	0.689264	0.664466	0.68407			29.842	0.72801	0.074375	0.791374	0.871376	0.788132	0.631907	0.669847	0.708392	0.642429	0.791497	0.648935	0.762481	0.731012	0.698742
	30.388	0.675	0.068218	0.693599	0.543801	0.770581	0.645424	0.712561	0.674807	0.54992	0.646787	0.691432	0.680738	0.629186	0.817031	0.790317	0.654923	0.614714	0.670554	0.706221	0.69233	0.633218	0.681855			30.375	0.734801	0.076195	0.749976	0.910458	0.805633	0.679007	0.638407	0.70825	0.66058	0.780778	0.65929	0.766242	0.741332	0.717664
	30.921	0.676758	0.072071	0.661162	0.546411	0.782772	0.635344	0.71463	0.670078	0.538603	0.643819	0.699625	0.665989	0.633714	0.81639	0.807003	0.66426	0.616896	0.659699	0.729338	0.704633	0.660382	0.684405			30.907	0.729182	0.065497	0.784618	0.848607	0.787996	0.694412	0.64739	0.694505	0.654052	0.78438	0.64875	0.765948	0.73713	0.702395
	31.454	0.682901	0.068714	0.681184	0.566122	0.777745	0.645508	0.712694	0.692331	0.537846	0.657166	0.697665	0.670701	0.631736	0.81734	0.803214	0.670521	0.617469	0.674734	0.726244	0.715122	0.676912	0.68577			31.44	0.736179	0.065458	0.79319	0.87524	0.793341	0.707926	0.666357	0.702292	0.660899	0.766952	0.656746	0.759464	0.74558	0.706166
	31.987	0.686057	0.070219	0.67594	0.57507	0.786981	0.644821	0.715977	0.696207	0.549141	0.655024	0.702748	0.65588	0.655558	0.837306	0.805803	0.661332	0.620907	0.667627	0.73175	0.728541	0.670497	0.684032			31.973	0.743859	0.070782	0.768978	0.891759	0.814614	0.723724	0.658624	0.71025	0.661253	0.775314	0.657095	0.79717	0.748111	0.719417
	32.52	0.686546	0.072825	0.682664	0.572053	0.798709	0.636894	0.729652	0.679737	0.54963	0.662357	0.695738	0.653648	0.656124	0.8431	0.807578	0.667378	0.623945	0.648554	0.735785	0.72709	0.66942	0.690863			32.506	0.748229	0.073532	0.811954	0.885976	0.8227	0.668459	0.69423	0.731086	0.656746	0.789675	0.664712	0.800027	0.744495	0.708687
	33.053	0.694895	0.071522	0.685259	0.586354	0.802759	0.631574	0.745829	0.680995	0.573964	0.68248	0.71299	0.677216	0.663848	0.849091	0.813502	0.664505	0.631803	0.648335	0.755631	0.727721	0.666343	0.697705			33.039	0.750891	0.073911	0.783931	0.905753	0.830724	0.710477	0.680358	0.73967	0.652766	0.796135	0.665523	0.788051	0.745627	0.711679
	33.586	0.694029	0.067265	0.689594	0.586647	0.796437	0.634083	0.744151	0.698734	0.574771	0.675863	0.728953	0.664479	0.65826	0.817523	0.808613	0.66411	0.641531	0.660754	0.758277	0.731855	0.660895	0.685057			33.572	0.751712	0.075413	0.803527	0.872189	0.841592	0.726265	0.664181	0.719851	0.657009	0.787656	0.663234	0.836607	0.748181	0.700253
	34.119	0.698755	0.069514	0.707283	0.592692	0.810718	0.639899	0.750366	0.70476	0.574021	0.689671	0.726939	0.670361	0.649962	0.825761	0.81743	0.658591	0.64439	0.66235	0.756385	0.736866	0.663314	0.693345			34.105	0.755387	0.070926	0.787255	0.896064	0.848762	0.721186	0.676769	0.749743	0.662088	0.779448	0.671326	0.789963	0.756347	0.725688
	34.652	0.705037	0.074549	0.705944	0.602906	0.810755	0.648366	0.767414	0.715155	0.563526	0.690559	0.746554	0.68207	0.663604	0.854871	0.841961	0.66857	0.641768	0.662577	0.745779	0.730211	0.661736	0.696419			34.638	0.763684	0.07698	0.817135	0.923754	0.843596	0.730025	0.688135	0.749995	0.66923	0.785426	0.6698	0.818888	0.746095	0.722126
	35.186	0.705428	0.070038	0.710087	0.599208	0.825231	0.659239	0.750973	0.704909	0.582456	0.685143	0.751732	0.679872	0.658797	0.832234	0.830195	0.691135	0.650582	0.676045	0.756518	0.732314	0.647816	0.684067			35.17	0.764132	0.073552	0.815141	0.921939	0.816906	0.756607	0.677104	0.743662	0.685945	0.792648	0.671976	0.823449	0.741571	0.722633
	35.719	0.70884	0.071316	0.70139	0.609631	0.837375	0.662619	0.743933	0.705627	0.572692	0.691635	0.762912	0.705055	0.668827	0.835883	0.836181	0.687766	0.653376	0.679411	0.758685	0.72961	0.654403	0.679794			35.703	0.766228	0.070929	0.800047	0.898158	0.834432	0.769474	0.681542	0.710171	0.686495	0.820015	0.665808	0.80727	0.77981	0.741516
	36.252	0.709547	0.071408	0.69692	0.603154	0.847042	0.666063	0.74947	0.702712	0.579579	0.696759	0.774247	0.694293	0.663734	0.835848	0.828297	0.67708	0.657076	0.680575	0.752931	0.730866	0.665764	0.688533			36.236	0.776486	0.078936	0.875614	0.92043	0.835983	0.762461	0.699419	0.733444	0.690347	0.803204	0.669106	0.840013	0.761822	0.725987
	36.785	0.714767	0.069088	0.713228	0.611282	0.849669	0.668018	0.767019	0.704022	0.584553	0.694612	0.759185	0.713582	0.671373	0.832076	0.828423	0.690075	0.655876	0.68327	0.754174	0.738151	0.676367	0.700385			36.769	0.781835	0.074478	0.870648	0.921241	0.828594	0.804934	0.71197	0.77005	0.684188	0.805033	0.67594	0.82103	0.756429	0.731968
	37.318	0.716418	0.069525	0.721514	0.604209	0.847803	0.662449	0.744807	0.694176	0.581555	0.711241	0.761967	0.708712	0.690377	0.849709	0.810017	0.683245	0.659581	0.693499	0.774825	0.744057	0.692657	0.691959			37.302	0.784166	0.076307	0.868555	0.929608	0.838237	0.757213	0.711661	0.784352	0.687327	0.792789	0.675633	0.848545	0.765987	0.750086
	37.851	0.718581	0.070121	0.719214	0.618652	0.823101	0.678329	0.763613	0.690263	0.563049	0.705103	0.797466	0.701354	0.673908	0.842069	0.821425	0.685982	0.671477	0.698271	0.778884	0.748262	0.689218	0.701982			37.835	0.789486	0.076632	0.86644	0.933245	0.834384	0.793062	0.713733	0.770422	0.68328	0.787131	0.688577	0.872649	0.778491	0.752422
	38.385	0.718626	0.065203	0.736369	0.608104	0.839604	0.683567	0.728796	0.692253	0.587366	0.708733	0.788838	0.718633	0.676807	0.793761	0.836477	0.672281	0.676431	0.693863	0.761695	0.755492	0.705105	0.708353			38.368	0.784419	0.074043	0.848393	0.94547	0.830731	0.783248	0.701456	0.740773	0.707775	0.78993	0.690169	0.845133	0.75753	0.772418
	38.918	0.721938	0.068602	0.721358	0.615119	0.880693	0.675394	0.724606	0.707186	0.580936	0.718629	0.797139	0.705684	0.676085	0.787965	0.824032	0.679042	0.682852	0.689504	0.764651	0.759223	0.718322	0.730331			38.901	0.787293	0.073248	0.872119	0.95327	0.801751	0.780024	0.691068	0.777868	0.723985	0.815662	0.699183	0.812081	0.757914	0.762594
	39.45	0.72297	0.071275	0.735234	0.598983	0.878141	0.68035	0.730949	0.710146	0.57415	0.726454	0.800974	0.691887	0.670426	0.801342	0.82717	0.679297	0.683735	0.71115	0.755217	0.758118	0.727484	0.718189			39.434	0.792562	0.071747	0.876333	0.942	0.800888	0.777196	0.709033	0.780336	0.751663	0.817941	0.696926	0.860287	0.751285	0.746853
	39.984	0.725318	0.073473	0.744528	0.5945	0.871467	0.688635	0.736256	0.706538	0.574496	0.723338	0.816748	0.705754	0.686067	0.828837	0.82239	0.6717	0.677014	0.699107	0.767257	0.752483	0.707853	0.731383			39.967	0.797195	0.074519	0.862108	0.974924	0.830292	0.768009	0.706085	0.779652	0.745373	0.799898	0.714907	0.854081	0.762514	0.768501
	40.517	0.729418	0.070671	0.745536	0.608353	0.863493	0.690333	0.749988	0.711346	0.573713	0.720552	0.810956	0.688479	0.692717	0.808266	0.834645	0.692618	0.688566	0.710202	0.785137	0.755203	0.703861	0.754397			40.499	0.796753	0.076165	0.863948	0.9777	0.830373	0.789468	0.720767	0.769477	0.737725	0.802295	0.694566	0.84669	0.752619	0.775409
	41.05	0.729592	0.072505	0.748175	0.612277	0.880448	0.69396	0.773363	0.705458	0.579826	0.733238	0.79536	0.671676	0.698379	0.810538	0.832631	0.679079	0.683738	0.689785	0.784341	0.7612	0.709858	0.74851			41.032	0.806231	0.07474	0.876913	0.990198	0.840659	0.799439	0.735746	0.78591	0.734464	0.789259	0.711512	0.834955	0.794345	0.781369
	41.583	0.731534	0.0731	0.747252	0.619261	0.886284	0.670645	0.770179	0.699356	0.58166	0.737544	0.821859	0.710116	0.697894	0.791636	0.834872	0.690507	0.679171	0.687086	0.794261	0.760891	0.706754	0.743457			41.565	0.803799	0.067784	0.878894	0.964794	0.821216	0.792657	0.753782	0.788079	0.737592	0.796606	0.717285	0.84472	0.79157	0.758389
	42.116	0.734572	0.069667	0.73991	0.622097	0.883333	0.693728	0.778484	0.694396	0.599726	0.748235	0.809531	0.688263	0.708422	0.793839	0.840525	0.696134	0.681396	0.709291	0.795298	0.770595	0.708303	0.72993			42.098	0.804022	0.070889	0.866349	0.969502	0.82516	0.773026	0.721872	0.804498	0.745493	0.785916	0.727709	0.873034	0.786341	0.769362
	42.649	0.736338	0.070218	0.742682	0.632794	0.887962	0.70923	0.772413	0.693435	0.592061	0.75011	0.813609	0.708962	0.719477	0.793888	0.850811	0.690666	0.682965	0.703383	0.795609	0.76356	0.703646	0.719504			42.631	0.807852	0.073388	0.875111	0.975006	0.807853	0.790485	0.710469	0.787071	0.75764	0.829947	0.723592	0.875385	0.795536	0.766133
	43.182	0.739388	0.069245	0.75886	0.627942	0.88929	0.701421	0.783998	0.701717	0.601971	0.738996	0.809891	0.70156	0.719651	0.801768	0.832219	0.707675	0.687621	0.699237	0.814277	0.767637	0.706535	0.7355			43.164	0.813778	0.085089	0.863235	1.04707	0.829289	0.811507	0.727636	0.801116	0.744327	0.813964	0.740512	0.840767	0.791568	0.754344
	43.716	0.743738	0.074645	0.76498	0.626469	0.9025	0.700389	0.765563	0.705701	0.60027	0.766352	0.826542	0.680115	0.731876	0.804382	0.856676	0.697648	0.691111	0.704767	0.816919	0.766064	0.70499	0.761454			43.697	0.813416	0.084801	0.852661	1.01687	0.828693	0.833271	0.701521	0.807242	0.76057	0.81978	0.725482	0.885549	0.799781	0.729576
	44.249	0.742821	0.072735	0.75214	0.621551	0.891423	0.692513	0.769978	0.707362	0.602329	0.760621	0.846682	0.710559	0.737688	0.816609	0.840342	0.685886	0.692855	0.714646	0.808131	0.759431	0.709061	0.736607			44.23	0.811538	0.069972	0.836443	0.978225	0.857404	0.804566	0.730809	0.798567	0.74634	0.808546	0.725385	0.86602	0.818393	0.767763
	44.782	0.748594	0.073873	0.750722	0.615937	0.884064	0.712397	0.785007	0.727512	0.603338	0.794821	0.851742	0.697359	0.739161	0.823218	0.833424	0.691734	0.697064	0.71657	0.830068	0.765023	0.710777	0.741934			44.763	0.811841	0.086816	0.894358	1.01737	0.85484	0.777187	0.710153	0.777535	0.738993	0.832651	0.724788	0.859519	0.803033	0.751665
	45.315	0.751639	0.075428	0.758556	0.623891	0.868281	0.701156	0.7812	0.734323	0.604994	0.789947	0.847357	0.715146	0.720157	0.871692	0.855844	0.700486	0.695326	0.715544	0.823652	0.768604	0.70571	0.750913			45.295	0.806885	0.083676	0.883824	0.986239	0.858359	0.779252	0.709597	0.777772	0.735717	0.80841	0.738487	0.887546	0.805143	0.712276
	45.848	0.752221	0.079072	0.745619	0.616815	0.866797	0.697481	0.775869	0.739711	0.617543	0.792204	0.852402	0.713283	0.730808	0.897251	0.861958	0.697089	0.687125	0.709404	0.82612	0.772554	0.690836	0.753548			45.828	0.805399	0.066645	0.860729	0.930382	0.860903	0.799358	0.713949	0.767104	0.761615	0.820596	0.7449	0.877039	0.802036	0.726174
	46.381	0.75133	0.082118	0.751618	0.617688	0.883327	0.70124	0.773588	0.76632	0.604523	0.790756	0.849111	0.681107	0.720696	0.869837	0.875995	0.678059	0.692716	0.714684	0.836836	0.780478	0.695663	0.742356			46.361	0.826279	0.064433	0.873017	0.948043	0.869265	0.81189	0.758372	0.822126	0.776256	0.809808	0.748938	0.915952	0.827341	0.754335
	46.914	0.749712	0.079841	0.749945	0.632643	0.895172	0.710892	0.77887	0.74433	0.604989	0.79448	0.770765	0.672332	0.719491	0.876223	0.891713	0.689379	0.696525	0.713762	0.828734	0.781769	0.701964	0.740254			46.894	0.827486	0.100025	0.915276	1.0855	0.864604	0.82247	0.708744	0.786848	0.767344	0.802183	0.738002	0.86819	0.80933	0.761347
	47.447	0.75165	0.081036	0.741452	0.629471	0.903924	0.731331	0.794369	0.753782	0.602916	0.787088	0.730422	0.668937	0.71461	0.877276	0.896291	0.698187	0.708303	0.724698	0.839341	0.777721	0.711284	0.741589			47.427	0.828966	0.095768	0.905175	1.07584	0.832985	0.800937	0.701941	0.807188	0.768819	0.836838	0.748458	0.879006	0.825028	0.765387
	47.98	0.752606	0.080944	0.766784	0.638091	0.891801	0.711353	0.783663	0.74853	0.587977	0.795301	0.772434	0.668721	0.717114	0.870455	0.886707	0.697042	0.7036	0.716395	0.853975	0.784687	0.71491	0.74259			47.96	0.824887	0.095815	0.87977	1.07429	0.829513	0.818399	0.699227	0.785531	0.75469	0.835685	0.745567	0.879399	0.834672	0.761906
	48.514	0.763418	0.080859	0.774291	0.626381	0.891917	0.713524	0.793737	0.749343	0.631226	0.807141	0.851357	0.691417	0.737174	0.890508	0.885742	0.695769	0.706435	0.717965	0.847698	0.802088	0.725276	0.729366			48.493	0.820739	0.077307	0.910967	0.972564	0.849362	0.817078	0.691186	0.766254	0.783276	0.841697	0.748051	0.888075	0.804896	0.775455
	49.047	0.761561	0.077793	0.758938	0.631105	0.88267	0.714269	0.787603	0.774742	0.632367	0.798237	0.853422	0.708174	0.727457	0.850798	0.896438	0.676965	0.716767	0.709955	0.854485	0.795693	0.728224	0.732918			49.026	0.827997	0.073598	0.916274	0.955924	0.869853	0.84361	0.696274	0.798019	0.787888	0.839108	0.747447	0.886783	0.825943	0.768843
	49.58	0.762707	0.074685	0.752328	0.632696	0.87088	0.722196	0.777986	0.780407	0.642297	0.801461	0.867108	0.722706	0.729101	0.820575	0.890162	0.669752	0.714157	0.725142	0.857747	0.809856	0.71767	0.749913			49.559	0.823743	0.070445	0.892926	0.940714	0.863143	0.862038	0.688763	0.78597	0.782808	0.844915	0.756279	0.883026	0.817365	0.766968
	50.113	0.765515	0.072987	0.77201	0.647278	0.862693	0.719392	0.785418	0.748069	0.647638	0.809388	0.852108	0.713865	0.725623	0.836133	0.90062	0.671578	0.719495	0.738119	0.866428	0.802888	0.740608	0.75095			50.091	0.824982	0.07194	0.905206	0.932837	0.876641	0.87441	0.681871	0.786645	0.776935	0.81918	0.757734	0.876763	0.8333	0.77826
	50.646	0.763959	0.075785	0.75537	0.654056	0.867735	0.728871	0.801759	0.753997	0.633052	0.804888	0.854155	0.711758	0.716273	0.82418	0.91342	0.676722	0.716169	0.733128	0.870415	0.794401	0.715949	0.752889			50.624	0.832842	0.08235	0.919326	0.98843	0.894767	0.850867	0.693889	0.800754	0.782508	0.832471	0.765177	0.90289	0.80521	0.757812
	51.179	0.769137	0.07991	0.768408	0.627063	0.875178	0.723661	0.800832	0.75551	0.638687	0.828925	0.854776	0.729572	0.715651	0.830498	0.93024	0.680273	0.72404	0.740468	0.874005	0.801098	0.729377	0.754475			51.157	0.836727	0.083201	0.938617	0.996687	0.875046	0.844116	0.692894	0.833583	0.761817	0.831438	0.761201	0.896273	0.826816	0.782233
	51.712	0.772399	0.083454	0.757447	0.634457	0.875826	0.726684	0.803556	0.749194	0.652309	0.829909	0.886036	0.723009	0.703907	0.85764	0.929792	0.686256	0.721311	0.726035	0.89117	0.800908	0.730421	0.762115			51.69	0.835371	0.077212	0.898501	0.995916	0.883736	0.841374	0.696823	0.826603	0.799062	0.843372	0.762268	0.884024	0.8283	0.764469
	52.245	0.77658	0.083305	0.76507	0.644544	0.898804	0.739371	0.794312	0.747702	0.654311	0.837644	0.89343	0.720196	0.714648	0.853918	0.92788	0.702052	0.722599	0.72857	0.89122	0.815021	0.723563	0.75675			52.223	0.843026	0.076332	0.903035	1.01194	0.913023	0.84023	0.730513	0.832079	0.786595	0.845139	0.766129	0.880885	0.820607	0.786137
	52.779	0.783508	0.086494	0.796072	0.664165	0.901006	0.728148	0.795968	0.771882	0.640043	0.838158	0.896713	0.733275	0.715158	0.896259	0.942911	0.701034	0.727818	0.744179	0.889962	0.811738	0.714068	0.761609			52.756	0.848928	0.079911	0.915475	1.01801	0.903557	0.859667	0.736095	0.85312	0.779765	0.839492	0.760967	0.909733	0.831326	0.779932
	53.312	0.786143	0.085295	0.791189	0.657553	0.905524	0.739741	0.780887	0.768934	0.665053	0.832375	0.90656	0.716389	0.708451	0.893654	0.939353	0.704622	0.734191	0.742267	0.893763	0.828902	0.731273	0.782182			53.289	0.852918	0.084021	0.924684	1.02693	0.912119	0.869807	0.721987	0.853862	0.790865	0.861232	0.765927	0.907015	0.826148	0.774438
	53.845	0.7889	0.087859	0.810308	0.661245	0.893902	0.719308	0.795476	0.790303	0.658762	0.853166	0.898083	0.7214	0.724026	0.919898	0.939959	0.704559	0.72996	0.73504	0.906039	0.817067	0.725275	0.774227			53.822	0.851343	0.075789	0.941356	0.995898	0.902747	0.854696	0.747213	0.879442	0.776387	0.8429	0.778479	0.898561	0.824069	0.774362
	54.378	0.790026	0.087129	0.804046	0.670019	0.886288	0.729417	0.801064	0.797676	0.652202	0.85507	0.893219	0.704027	0.731141	0.918148	0.94216	0.70859	0.733162	0.742056	0.914048	0.819795	0.734151	0.764231			54.354	0.843757	0.07763	0.934476	0.986974	0.873553	0.87275	0.709127	0.861587	0.792262	0.833341	0.77354	0.901414	0.817686	0.76837
	54.911	0.789489	0.083845	0.801934	0.674332	0.898976	0.722796	0.804224	0.804034	0.662463	0.845341	0.869167	0.708288	0.735188	0.89539	0.9509	0.705188	0.731578	0.743323	0.908231	0.818977	0.733528	0.775924			54.887	0.838203	0.075817	0.922632	0.961171	0.876386	0.86109	0.711854	0.858102	0.780544	0.837615	0.761107	0.918339	0.809752	0.759848
	55.444	0.793788	0.083177	0.809733	0.68333	0.894989	0.730156	0.806438	0.8082	0.667069	0.840286	0.89322	0.718876	0.749087	0.924462	0.938619	0.715549	0.730635	0.743727	0.906984	0.810668	0.725985	0.777741			55.42	0.847449	0.08695	0.935847	1.00464	0.897742	0.821423	0.686227	0.886041	0.797132	0.863208	0.758307	0.914099	0.821289	0.783431
	55.977	0.794369	0.084469	0.814463	0.689726	0.902942	0.733184	0.803374	0.794291	0.65691	0.845034	0.893163	0.718695	0.742313	0.917712	0.939292	0.709698	0.732877	0.748212	0.911665	0.811407	0.720004	0.802411			55.953	0.850645	0.080344	0.906936	1.01915	0.881774	0.856254	0.715612	0.889101	0.813763	0.848948	0.749341	0.90667	0.828488	0.791703
	56.51	0.795546	0.085814	0.795014	0.705101	0.900549	0.737219	0.804994	0.803314	0.660286	0.838427	0.901947	0.709234	0.75049	0.935199	0.938245	0.705298	0.736893	0.754754	0.919768	0.814397	0.710189	0.789604			56.486	0.8482	0.08128	0.924094	0.991993	0.890473	0.83879	0.719948	0.863588	0.796355	0.856419	0.763877	0.944895	0.829892	0.758077
	57.044	0.796318	0.086543	0.799816	0.709292	0.902292	0.731782	0.83853	0.809472	0.645342	0.845998	0.893243	0.693063	0.749714	0.94225	0.937489	0.710423	0.740319	0.76402	0.890004	0.804971	0.706812	0.811526			57.019	0.855204	0.084755	0.931792	1.00201	0.903876	0.874807	0.722045	0.882215	0.80275	0.883892	0.77267	0.931404	0.810025	0.744965
	57.577	0.79601	0.08738	0.818801	0.691808	0.905096	0.739212	0.830192	0.822096	0.654814	0.872233	0.868631	0.688338	0.745604	0.935785	0.927315	0.697284	0.738129	0.765295	0.912361	0.80564	0.711907	0.789663			57.552	0.852754	0.079984	0.90656	1.01397	0.880131	0.88262	0.734532	0.881219	0.796339	0.885743	0.767498	0.906152	0.825006	0.753279
	58.11	0.798879	0.082886	0.818067	0.697576	0.901307	0.731115	0.830915	0.812457	0.68173	0.858874	0.858377	0.729541	0.735268	0.948172	0.925563	0.695846	0.743187	0.758572	0.910671	0.821648	0.71424	0.804446			58.085	0.848085	0.080939	0.927632	0.985489	0.891538	0.873268	0.71436	0.881834	0.793017	0.871081	0.775301	0.911572	0.807726	0.744199
	58.643	0.797884	0.085095	0.822453	0.710398	0.904747	0.738932	0.813884	0.825554	0.641677	0.859808	0.853015	0.720808	0.737773	0.937666	0.943499	0.702822	0.745695	0.776151	0.906633	0.813429	0.711311	0.791417			58.617	0.851656	0.077178	0.910709	0.978518	0.898108	0.869972	0.714579	0.896919	0.812418	0.872972	0.764156	0.914816	0.826286	0.760421
	59.176	0.798372	0.084362	0.835523	0.703635	0.907397	0.726356	0.824573	0.824372	0.662173	0.865859	0.855945	0.700618	0.736144	0.934327	0.937405	0.711176	0.743015	0.769419	0.904837	0.810809	0.722736	0.791128			59.151	0.854643	0.076429	0.936203	0.9939	0.881041	0.871308	0.702288	0.871887	0.813378	0.879458	0.783935	0.899957	0.82818	0.794185
	59.709	0.797358	0.079991	0.858838	0.691993	0.890475	0.74488	0.822258	0.832939	0.655848	0.872215	0.857278	0.71747	0.730297	0.907385	0.91624	0.71852	0.7451	0.778458	0.897386	0.805467	0.70985	0.794272			59.683	0.859565	0.088043	0.939108	1.03126	0.88419	0.867411	0.717051	0.839016	0.793458	0.878218	0.782555	0.959188	0.849722	0.773606
	60.242	0.797282	0.081124	0.848229	0.712227	0.900854	0.731725	0.819434	0.840358	0.653372	0.867962	0.836695	0.711369	0.744724	0.916169	0.927718	0.726838	0.741991	0.769486	0.900974	0.799485	0.698594	0.797436			60.216	0.85616	0.082411	0.941785	0.959233	0.924048	0.897646	0.70525	0.852595	0.806841	0.901263	0.764563	0.934713	0.810682	0.775297
	60.775	0.799242	0.078743	0.845621	0.702397	0.903485	0.740442	0.824422	0.835	0.66216	0.873618	0.838779	0.744919	0.742888	0.898626	0.926907	0.725866	0.737444	0.760442	0.912385	0.804838	0.708114	0.79648			60.749	0.861287	0.08178	0.965759	0.991273	0.894687	0.91598	0.723334	0.818582	0.824063	0.898557	0.770583	0.920857	0.813158	0.79861
	61.308	0.801495	0.078598	0.831708	0.717231	0.905434	0.739109	0.819717	0.838499	0.675285	0.867273	0.846298	0.747815	0.735092	0.917724	0.93442	0.725411	0.741087	0.764898	0.909062	0.816753	0.703569	0.793518			61.282	0.866707	0.093475	0.973942	1.00513	0.907896	0.908803	0.669949	0.85645	0.845939	0.912748	0.771011	0.925265	0.843055	0.780291
	61.842	0.801163	0.077383	0.841736	0.711934	0.891625	0.725556	0.837817	0.837119	0.674158	0.877852	0.834706	0.726285	0.751783	0.878168	0.932378	0.732454	0.745288	0.773377	0.922379	0.811261	0.702634	0.814753			61.815	0.862122	0.080852	0.96123	0.957193	0.893921	0.927322	0.699277	0.837575	0.836567	0.914919	0.771298	0.921689	0.827213	0.797263
	62.375	0.80784	0.082984	0.840924	0.720556	0.903139	0.75402	0.851398	0.841777	0.647911	0.876755	0.858221	0.759973	0.758962	0.923273	0.951073	0.725984	0.751966	0.765424	0.912955	0.817468	0.69425	0.800775			62.348	0.866559	0.091229	0.957121	0.95975	0.90452	0.943994	0.677487	0.822776	0.843177	0.918981	0.76561	0.971659	0.823183	0.810447
	62.908	0.804709	0.08211	0.825044	0.720189	0.917756	0.748233	0.836138	0.848304	0.650009	0.878471	0.844154	0.736158	0.754262	0.90959	0.936407	0.723415	0.756222	0.793014	0.913099	0.815799	0.685577	0.802338			62.881	0.87244	0.091126	0.962393	0.99299	0.916314	0.931183	0.696917	0.835366	0.83214	0.954313	0.776896	0.946247	0.834788	0.78973
	63.441	0.805728	0.080957	0.818844	0.724203	0.914902	0.735502	0.85287	0.846752	0.645864	0.869136	0.840588	0.744161	0.762499	0.905063	0.94275	0.731964	0.759499	0.778413	0.906445	0.829348	0.692682	0.813077			63.414	0.867683	0.092083	0.981243	0.997542	0.904975	0.916671	0.70023	0.829075	0.816798	0.9448	0.767405	0.935171	0.818906	0.799377
	63.974	0.807987	0.085986	0.831523	0.754811	0.932511	0.73292	0.85737	0.857165	0.642725	0.862216	0.842417	0.728943	0.752123	0.93056	0.948901	0.728058	0.753925	0.790273	0.907028	0.828742	0.684167	0.793367			63.947	0.868537	0.085681	0.982813	0.95795	0.903125	0.91193	0.702267	0.850482	0.815879	0.931593	0.775899	0.955485	0.834123	0.800902
	64.507	0.811617	0.079718	0.83817	0.751496	0.912988	0.756844	0.856222	0.846033	0.642155	0.877215	0.845463	0.740329	0.773105	0.914308	0.931381	0.727635	0.762135	0.786786	0.922339	0.8426	0.70761	0.797521			64.479	0.862098	0.07813	0.981128	0.943045	0.894944	0.899199	0.71641	0.832343	0.827001	0.907418	0.766832	0.938406	0.819936	0.818511
	65.04	0.813631	0.079385	0.822891	0.758305	0.924275	0.736574	0.874953	0.838186	0.663753	0.865115	0.831861	0.743788	0.771503	0.905367	0.954206	0.742032	0.768032	0.783506	0.926878	0.851482	0.707443	0.802465			65.012	0.870135	0.085502	0.970927	1.00083	0.867218	0.929229	0.700838	0.846924	0.842029	0.921072	0.776349	0.935557	0.824587	0.826062
	65.573	0.812006	0.081965	0.807336	0.764802	0.928161	0.738029	0.864779	0.842046	0.655961	0.886245	0.854967	0.733832	0.77368	0.899061	0.952857	0.738749	0.764958	0.77823	0.922766	0.840904	0.693451	0.7993			65.545	0.870306	0.084325	0.984363	0.980341	0.8904	0.9131	0.69629	0.856156	0.848404	0.933426	0.777407	0.920522	0.817763	0.825502
	66.106	0.816153	0.081948	0.821418	0.762486	0.939703	0.744038	0.867687	0.864626	0.662058	0.887887	0.838771	0.741489	0.77917	0.910761	0.958518	0.743389	0.764491	0.77916	0.919325	0.832008	0.700797	0.805289			66.078	0.87919	0.075024	0.959114	0.998696	0.88123	0.901897	0.733396	0.888958	0.871606	0.941332	0.779104	0.921519	0.841014	0.832409
	66.64	0.820179	0.079664	0.820627	0.769079	0.929119	0.73326	0.872063	0.863529	0.673221	0.870117	0.853078	0.757674	0.786354	0.914837	0.954157	0.754437	0.761331	0.782718	0.935746	0.850968	0.704695	0.81656			66.611	0.88714	0.069992	0.975983	0.987982	0.889373	0.90844	0.765031	0.885088	0.880265	0.947747	0.793243	0.937721	0.851707	0.823101
	67.173	0.825261	0.081581	0.821377	0.783548	0.942394	0.764791	0.866396	0.86321	0.659857	0.8793	0.846896	0.759726	0.791464	0.914211	0.968099	0.761687	0.76411	0.793983	0.948578	0.849199	0.702177	0.824217			67.144	0.872654	0.067762	0.964104	0.958185	0.849361	0.899501	0.750573	0.844756	0.865932	0.932101	0.786521	0.940173	0.851179	0.829457
	67.706	0.822197	0.082528	0.810587	0.777727	0.959494	0.756089	0.847222	0.881828	0.668905	0.888501	0.826138	0.761765	0.790696	0.926005	0.957964	0.746603	0.765201	0.780959	0.938056	0.837748	0.704821	0.817634			67.677	0.875998	0.077425	0.970596	1.00465	0.837052	0.916481	0.744446	0.824452	0.871512	0.921198	0.777648	0.941553	0.856547	0.845845
	68.239	0.822259	0.080921	0.823455	0.776906	0.94139	0.749973	0.848487	0.876132	0.66706	0.90199	0.830357	0.753058	0.785944	0.918524	0.948962	0.763011	0.763623	0.78168	0.942065	0.851096	0.705686	0.815773			68.21	0.879543	0.067365	0.939973	1.00795	0.845918	0.904828	0.783561	0.862114	0.866558	0.924232	0.778521	0.939407	0.871649	0.829802
	68.772	0.822671	0.077441	0.8088	0.783342	0.933963	0.768624	0.867145	0.871432	0.668802	0.903573	0.830229	0.779369	0.772193	0.916348	0.939008	0.748644	0.770724	0.789499	0.945385	0.831987	0.718649	0.805711			68.742	0.880138	0.083137	0.971202	1.02391	0.8028	0.933669	0.773975	0.81732	0.873302	0.909115	0.777337	0.978574	0.85615	0.844311
	69.305	0.821173	0.072874	0.796952	0.781726	0.92945	0.756151	0.832485	0.872464	0.697485	0.895769	0.81765	0.7787	0.772789	0.901208	0.95604	0.763159	0.772916	0.791434	0.932892	0.844874	0.717628	0.811679			69.275	0.889271	0.075489	0.975444	0.989015	0.883971	0.923599	0.794939	0.815339	0.861382	0.933658	0.78656	1.00536	0.855091	0.846898
	69.838	0.824277	0.074561	0.796375	0.779919	0.940752	0.787593	0.849936	0.871211	0.709522	0.907315	0.839958	0.782688	0.752413	0.886391	0.954788	0.761034	0.767895	0.796551	0.942552	0.845445	0.704309	0.808898			69.808	0.881359	0.075221	0.955003	0.996943	0.859803	0.921894	0.748987	0.836852	0.864616	0.901763	0.775714	0.979262	0.871763	0.863711
	70.371	0.826709	0.08146	0.806899	0.763531	0.961622	0.770587	0.843249	0.878538	0.705101	0.898045	0.865009	0.757592	0.756044	0.911019	0.958659	0.763812	0.780588	0.800423	0.951932	0.843515	0.688845	0.829175			70.341	0.88274	0.075042	0.976376	1.01872	0.848961	0.925684	0.792141	0.830891	0.861759	0.897753	0.7812	0.966464	0.856144	0.836783
	70.904	0.82897	0.081148	0.811715	0.750386	0.945588	0.768664	0.834309	0.896309	0.706151	0.910533	0.861582	0.795827	0.7614	0.925681	0.951322	0.766036	0.783494	0.778977	0.967317	0.841416	0.701823	0.820873			70.874	0.879902	0.082461	0.969599	1.05476	0.8448	0.916619	0.771536	0.808548	0.842453	0.905103	0.791715	0.951962	0.856807	0.844932
	71.438	0.834429	0.085869	0.831303	0.737757	0.948779	0.778512	0.837484	0.895853	0.709399	0.904758	0.862307	0.790635	0.757906	0.945722	0.966772	0.769633	0.778107	0.795775	0.987856	0.851143	0.69666	0.842226			71.407	0.874794	0.068695	0.964541	0.96564	0.853639	0.915803	0.779522	0.817241	0.85053	0.912197	0.783864	0.968286	0.836738	0.849523
	71.971	0.836742	0.082817	0.836491	0.750239	0.946527	0.787178	0.854072	0.894862	0.697242	0.900583	0.870578	0.792664	0.746509	0.945082	0.966844	0.782993	0.785583	0.807606	0.974378	0.839098	0.710907	0.845396			71.94	0.865704	0.071591	0.958916	0.99789	0.815746	0.904573	0.779984	0.813675	0.833227	0.912723	0.775328	0.921368	0.84163	0.833392
	72.504	0.836148	0.08533	0.834932	0.754095	0.95443	0.788918	0.835896	0.900224	0.689705	0.909372	0.857561	0.765027	0.760787	0.960743	0.97261	0.778419	0.782544	0.807262	0.963364	0.842258	0.711359	0.85346			72.473	0.872671	0.071434	0.933003	0.987683	0.87119	0.937237	0.778357	0.809563	0.837338	0.917646	0.78197	0.95639	0.841046	0.820633
	73.037	0.837919	0.081876	0.843075	0.746591	0.949112	0.792265	0.839665	0.897472	0.707343	0.905534	0.875677	0.775734	0.762107	0.958905	0.962991	0.772474	0.785213	0.807077	0.960763	0.838974	0.717587	0.85981			73.005	0.873314	0.079038	0.975789	0.977331	0.846324	0.9123	0.778889	0.8072	0.84623	0.920559	0.773091	0.992241	0.821697	0.82811
	73.57	0.838753	0.083844	0.850861	0.732446	0.944765	0.805602	0.827659	0.894271	0.701863	0.903138	0.879935	0.788505	0.756187	0.9766	0.963901	0.756271	0.782518	0.819255	0.957345	0.832163	0.727854	0.873918			73.538	0.877188	0.080956	0.989431	0.999635	0.869671	0.918034	0.786717	0.820215	0.834494	0.925165	0.769073	0.972376	0.813834	0.827615
	74.103	0.843884	0.085437	0.845989	0.739661	0.959254	0.795082	0.847261	0.90215	0.720668	0.911885	0.886435	0.801787	0.771405	0.989535	0.969493	0.765246	0.780428	0.816678	0.950345	0.842937	0.703677	0.877761			74.071	0.875818	0.075864	0.941034	0.980343	0.866954	0.930283	0.787622	0.800089	0.839999	0.944453	0.779747	0.984004	0.828699	0.826591
	74.636	0.844778	0.089962	0.850198	0.735412	0.988515	0.789396	0.844873	0.893817	0.703291	0.925537	0.893073	0.772504	0.787379	1.00311	0.975231	0.762605	0.78303	0.811567	0.94239	0.850808	0.723436	0.859388			74.604	0.883348	0.07048	0.97663	0.973539	0.884823	0.908293	0.810818	0.832251	0.840898	0.944023	0.79206	0.980389	0.828493	0.827965
	75.169	0.842411	0.086364	0.848917	0.722536	0.963476	0.791866	0.835105	0.897945	0.717101	0.921046	0.881423	0.800096	0.781242	0.98636	0.984377	0.750675	0.787292	0.811422	0.922916	0.863301	0.711719	0.869406			75.137	0.881118	0.081899	0.967736	1.00785	0.855052	0.920631	0.780952	0.814924	0.837007	0.93603	0.7947	1.0046	0.823691	0.830245
	75.702	0.845964	0.088583	0.860743	0.730243	0.936078	0.774472	0.850446	0.910437	0.696653	0.92121	0.878305	0.811144	0.78339	1.0055	0.98748	0.773755	0.7812	0.823939	0.952827	0.855288	0.717344	0.86883			75.67	0.885672	0.077668	0.954185	0.993133	0.877083	0.934328	0.768619	0.839736	0.840245	0.938938	0.794704	1.00628	0.844921	0.835892
	76.236	0.84356	0.092868	0.854628	0.714209	0.964661	0.769386	0.853122	0.913259	0.683959	0.917168	0.870265	0.785626	0.781934	0.997241	0.99077	0.776758	0.782621	0.816831	0.953728	0.853799	0.717776	0.873456			76.203	0.873075	0.076831	0.951908	0.946519	0.862666	0.934308	0.79089	0.802162	0.825952	0.935854	0.776628	1.00312	0.809612	0.837288
	76.769	0.8453	0.088704	0.849756	0.721257	0.947041	0.763339	0.847833	0.915899	0.688154	0.907497	0.859062	0.845322	0.783332	0.982848	0.99754	0.773353	0.781549	0.814128	0.959703	0.848369	0.734044	0.885984			76.736	0.880521	0.078873	0.962909	0.968822	0.883534	0.934721	0.745469	0.823691	0.848589	0.938066	0.797034	0.997072	0.838701	0.827643
	77.302	0.847212	0.093277	0.847662	0.736804	0.961066	0.790704	0.862011	0.920897	0.668361	0.929307	0.852635	0.807661	0.771774	0.994747	0.995723	0.783918	0.784257	0.822892	0.962784	0.850456	0.713252	0.887338			77.268	0.871108	0.078375	0.954832	0.937248	0.885533	0.925345	0.755149	0.812439	0.822669	0.929105	0.807655	1.00657	0.798658	0.818089
	77.835	0.845851	0.092217	0.844038	0.732589	0.980927	0.777447	0.857211	0.937433	0.693496	0.905366	0.848671	0.790649	0.771253	0.994048	1.00474	0.786343	0.77853	0.81569	0.951441	0.854674	0.726996	0.865478			77.802	0.874664	0.078028	0.994222	0.925146	0.878694	0.910112	0.74368	0.807421	0.841401	0.936718	0.806841	0.991434	0.833471	0.826829
	78.368	0.846273	0.092393	0.842941	0.713098	0.973676	0.771035	0.843174	0.93174	0.695676	0.915081	0.853278	0.820715	0.765357	0.977217	1.00647	0.803548	0.787061	0.809331	0.960758	0.856911	0.717284	0.88112			78.334	0.873474	0.066041	0.961711	0.943698	0.872606	0.889977	0.759723	0.821777	0.835187	0.926289	0.821685	0.97306	0.837589	0.838388
	78.901	0.850119	0.091924	0.844389	0.723397	0.972252	0.774949	0.866235	0.928955	0.710994	0.904898	0.86149	0.809732	0.770626	0.99586	1.01014	0.812196	0.784032	0.80907	0.956429	0.869525	0.710122	0.887102			78.867	0.879957	0.074438	0.96505	0.989672	0.865519	0.903888	0.765395	0.839789	0.841688	0.935015	0.827721	0.986613	0.830985	0.808147
	79.434	0.856267	0.086713	0.85761	0.743138	0.977963	0.777802	0.871463	0.935378	0.702277	0.887736	0.889997	0.831502	0.784706	0.999847	0.995126	0.812923	0.781826	0.830892	0.940399	0.88156	0.73622	0.886982			79.4	0.881461	0.073788	0.942059	0.98795	0.914837	0.930444	0.747443	0.83634	0.829515	0.931687	0.833346	0.969501	0.837086	0.817325
	79.968	0.852742	0.089086	0.843982	0.72683	0.978065	0.77394	0.869634	0.914118	0.717637	0.908784	0.876554	0.802668	0.778785	1.0141	0.98453	0.812088	0.785332	0.820775	0.940399	0.88078	0.721573	0.90427			79.933	0.880409	0.078997	0.992356	0.968346	0.912786	0.93218	0.759039	0.840385	0.817012	0.901084	0.826102	0.987547	0.831853	0.796218
	80.501	0.852652	0.08392	0.835472	0.748006	0.962371	0.774355	0.854763	0.92906	0.736528	0.903013	0.874945	0.810659	0.782188	0.990567	0.988	0.80561	0.788616	0.827795	0.94991	0.863489	0.717816	0.909886			80.466	0.879367	0.083034	0.956109	1.01491	0.92827	0.915673	0.777395	0.82587	0.812887	0.878324	0.814128	1.00528	0.833533	0.790037
	81.034	0.854755	0.086015	0.822437	0.741365	0.945712	0.781761	0.859783	0.936896	0.743854	0.919388	0.905509	0.798435	0.780092	1.01662	0.982768	0.800488	0.797565	0.815501	0.933757	0.891942	0.719414	0.901814			80.999	0.881032	0.09069	0.963232	1.02453	0.914276	0.932179	0.733555	0.857192	0.798778	0.875677	0.824232	1.01708	0.820714	0.810935
	81.567	0.849729	0.086224	0.821361	0.732524	0.95614	0.777307	0.877666	0.911672	0.728121	0.91093	0.934652	0.7782	0.78206	1.00329	0.9728	0.79064	0.792783	0.813487	0.928963	0.881557	0.72566	0.874765			81.532	0.881745	0.082392	0.962665	0.971469	0.954429	0.921619	0.768528	0.849872	0.794938	0.89678	0.819108	1.01621	0.807452	0.817862
	82.1	0.852931	0.084619	0.820423	0.737025	0.96038	0.775736	0.885458	0.893537	0.749762	0.930118	0.954245	0.787399	0.791758	0.984328	0.976602	0.800979	0.789735	0.826603	0.92641	0.886696	0.712561	0.868876			82.064	0.881929	0.085418	0.947876	1.00244	0.931663	0.942057	0.77364	0.805048	0.825366	0.887517	0.817493	1.0249	0.822967	0.802184
	82.633	0.853725	0.083513	0.824724	0.743952	0.978003	0.78155	0.88678	0.89009	0.746129	0.928669	0.927256	0.787548	0.79154	0.9839	0.980972	0.792012	0.793041	0.825404	0.916304	0.890995	0.719785	0.885842			82.597	0.888123	0.086756	0.968938	1.02875	0.921692	0.938778	0.792887	0.824157	0.81908	0.887177	0.821742	1.02717	0.812079	0.815036
	83.166	0.855207	0.085922	0.832036	0.742759	0.970869	0.789954	0.888398	0.894013	0.72819	0.921022	0.942725	0.806394	0.791383	1.0106	0.97741	0.803382	0.792245	0.824894	0.918682	0.890029	0.712896	0.866255			83.13	0.885373	0.089586	0.973719	1.03576	0.931675	0.950005	0.781157	0.814926	0.805645	0.886584	0.826387	1.00285	0.801944	0.813828
	83.699	0.852915	0.087003	0.818816	0.736945	0.961921	0.795838	0.883759	0.897088	0.723982	0.931427	0.941174	0.791245	0.80029	1.02085	0.962389	0.797356	0.789571	0.821515	0.92266	0.882607	0.712171	0.866706			83.663	0.877349	0.080371	0.930491	0.999903	0.929454	0.963936	0.780366	0.818554	0.804211	0.88925	0.81981	0.981664	0.810834	0.79971
	84.232	0.854145	0.089081	0.810028	0.725849	0.970949	0.787883	0.881813	0.897512	0.74543	0.918323	0.959451	0.802609	0.786407	1.00463	0.979682	0.794584	0.785145	0.806086	0.927836	0.904754	0.713717	0.880211			84.196	0.877264	0.086651	0.946743	1.02232	0.926321	0.897937	0.759843	0.840605	0.826255	0.902696	0.824103	1.0053	0.797102	0.777944
	84.766	0.85937	0.087153	0.828071	0.725097	0.984971	0.78493	0.895809	0.90167	0.761185	0.916889	0.955132	0.805783	0.817008	1.01676	0.973078	0.797572	0.790339	0.821377	0.918446	0.901493	0.715162	0.876621			84.729	0.88126	0.081521	0.975453	0.992649	0.932351	0.929964	0.768832	0.802255	0.814858	0.935414	0.820877	0.971928	0.810766	0.819773
	85.299	0.856686	0.089358	0.852358	0.727145	0.968229	0.788843	0.918482	0.900769	0.755949	0.923724	0.960946	0.788764	0.802102	1.0191	0.967204	0.783079	0.782165	0.811683	0.912467	0.888892	0.705446	0.87638			85.262	0.879918	0.086253	0.97745	1.01724	0.899006	0.901131	0.757416	0.831618	0.816939	0.930943	0.827426	0.995964	0.815326	0.788553
	85.832	0.863163	0.093448	0.849223	0.715255	0.981572	0.804257	0.898135	0.900371	0.745673	0.926656	0.970524	0.82466	0.814975	1.04158	0.977166	0.780403	0.794119	0.811583	0.928071	0.901051	0.70521	0.892762			85.795	0.884717	0.083075	0.950518	1.00547	0.896227	0.939336	0.757241	0.83229	0.834609	0.923704	0.833222	1.01838	0.813538	0.812077
	86.365	0.862287	0.091363	0.849053	0.716829	0.972113	0.813392	0.899329	0.905163	0.75083	0.933776	0.94154	0.809247	0.810833	1.05221	0.979899	0.784111	0.791682	0.830873	0.925623	0.885389	0.709609	0.884242			86.328	0.88833	0.085057	0.989282	1.00301	0.924852	0.923192	0.77391	0.810816	0.842565	0.927939	0.820436	1.01335	0.81851	0.812094
	86.898	0.864158	0.097528	0.848564	0.703289	0.99235	0.809758	0.879718	0.924367	0.742062	0.942885	0.952185	0.826811	0.802746	1.07423	0.976133	0.780118	0.79729	0.829732	0.922422	0.877765	0.710328	0.890398			86.861	0.890182	0.091485	0.980939	1.04743	0.891285	0.939268	0.778621	0.824833	0.8306	0.955519	0.816058	1.00323	0.814537	0.799858
	87.431	0.867734	0.094995	0.854138	0.693963	0.984944	0.815419	0.878044	0.924312	0.764531	0.935736	0.974621	0.836951	0.805376	1.04967	0.9841	0.776822	0.793929	0.835467	0.930548	0.891907	0.718181	0.906025			87.394	0.883685	0.088375	0.996408	0.981137	0.900586	0.95352	0.795672	0.789711	0.810806	0.96564	0.807046	0.992579	0.805376	0.805735
	87.964	0.868385	0.092234	0.863333	0.700855	0.972628	0.807987	0.874764	0.928806	0.772709	0.937464	0.974614	0.822427	0.799378	1.06142	0.975684	0.793035	0.793716	0.839192	0.932605	0.88726	0.736902	0.892908			87.926	0.883911	0.088169	0.974702	1.01258	0.886697	0.946682	0.776833	0.802389	0.804666	0.956059	0.829075	0.997931	0.801522	0.817797
	88.497	0.869002	0.093777	0.875721	0.702798	0.982874	0.810074	0.862086	0.94421	0.772636	0.945497	0.95882	0.82354	0.785059	1.05063	0.983875	0.779737	0.810267	0.828344	0.942622	0.887529	0.731712	0.902015			88.459	0.888001	0.087618	0.940798	1.01914	0.895545	0.933129	0.82133	0.801875	0.813131	0.950811	0.833193	1.03993	0.786086	0.82105
	89.03	0.870856	0.090714	0.877026	0.695728	0.974609	0.817709	0.860911	0.940508	0.771983	0.93087	0.966542	0.836282	0.821721	1.0569	0.978553	0.799564	0.794228	0.823253	0.936112	0.881049	0.745286	0.908279			88.992	0.895479	0.093066	0.974749	1.07698	0.905543	0.889525	0.829009	0.821916	0.832175	0.949858	0.835257	1.02812	0.792271	0.810354
	89.564	0.871369	0.096147	0.896682	0.698889	0.984193	0.813855	0.8473	0.940754	0.745325	0.932516	0.973438	0.824919	0.84242	1.06054	1.00009	0.793757	0.791516	0.836411	0.933847	0.896627	0.729644	0.884651			89.525	0.891891	0.103177	1.00498	1.07716	0.869131	0.897011	0.802564	0.779746	0.836297	0.945531	0.825225	1.04703	0.790732	0.827294
	90.097	0.870001	0.093975	0.879105	0.694988	0.986246	0.821085	0.855049	0.939468	0.764023	0.949826	0.949568	0.82249	0.819645	1.04848	0.997299	0.791553	0.788768	0.837966	0.927491	0.900328	0.726974	0.89966			90.058	0.884853	0.091445	0.965683	1.05113	0.857449	0.904031	0.789797	0.782144	0.8177	0.923216	0.822616	1.03043	0.809862	0.864173
	90.63	0.86732	0.091214	0.886244	0.690216	0.971984	0.827891	0.850297	0.94078	0.775901	0.939488	0.967402	0.800443	0.816853	1.03108	0.977684	0.788536	0.786679	0.83004	0.925625	0.905511	0.731683	0.902074			90.591	0.889785	0.089083	0.968466	1.05623	0.892246	0.911862	0.807083	0.813283	0.826777	0.932048	0.824457	1.02041	0.78867	0.83589
	91.163	0.866243	0.091538	0.871878	0.684264	0.978648	0.821752	0.843174	0.937878	0.795841	0.940738	0.950101	0.81701	0.796145	1.02646	0.985736	0.768191	0.783273	0.844334	0.930079	0.902833	0.737038	0.90948			91.124	0.898967	0.098767	0.965418	1.13394	0.896484	0.908369	0.824779	0.836003	0.815079	0.922371	0.81654	1.01005	0.800287	0.858277
	91.696	0.863243	0.093452	0.869587	0.675392	0.97778	0.807754	0.849736	0.94318	0.768711	0.940633	0.940791	0.823958	0.784814	1.03333	0.991395	0.78637	0.784639	0.826996	0.937164	0.89626	0.746546	0.879818			91.656	0.8896	0.104371	0.952714	1.13664	0.901017	0.903388	0.771243	0.828012	0.80302	0.928881	0.823907	0.992477	0.783816	0.850085
	92.229	0.869079	0.092499	0.870114	0.690358	0.987623	0.814333	0.856182	0.933432	0.777123	0.946766	0.970256	0.822115	0.815684	1.04198	0.975196	0.784994	0.78764	0.846335	0.941794	0.892746	0.735763	0.891158			92.19	0.893614	0.098432	0.973808	1.10258	0.906316	0.893363	0.785245	0.84079	0.806078	0.947473	0.828611	1.00929	0.790205	0.839597
	92.762	0.8707	0.093243	0.882876	0.698984	0.994346	0.834464	0.842215	0.957472	0.781503	0.941312	0.952	0.803351	0.811524	1.05706	0.96168	0.783222	0.793314	0.85592	0.932357	0.899875	0.727636	0.902884			92.722	0.884436	0.085241	0.99072	1.04911	0.8859	0.88955	0.822798	0.788543	0.81645	0.921817	0.831321	0.985222	0.808957	0.822839
	93.295	0.873191	0.094544	0.906143	0.694237	0.974863	0.828489	0.841131	0.954589	0.792349	0.932319	0.967429	0.815987	0.802117	1.06325	0.972472	0.775247	0.790187	0.847714	0.936493	0.904605	0.737195	0.927003			93.255	0.884317	0.083139	0.98806	1.03925	0.891889	0.901011	0.803632	0.798565	0.806473	0.913659	0.817241	0.982815	0.812235	0.856968
	93.828	0.866018	0.095841	0.885974	0.66699	0.969185	0.845292	0.820655	0.935964	0.789158	0.931552	0.945897	0.820881	0.796111	1.06341	0.96162	0.763188	0.787806	0.848188	0.938446	0.902416	0.729634	0.917991			93.788	0.884984	0.076976	0.975771	1.02306	0.910173	0.897846	0.804881	0.838555	0.792677	0.911427	0.808971	0.978618	0.82329	0.854536
	94.362	0.868971	0.096073	0.864303	0.664379	0.972935	0.825089	0.849479	0.937786	0.781498	0.933217	0.958464	0.846513	0.802571	1.06478	0.976298	0.77271	0.787013	0.852168	0.943385	0.900609	0.739236	0.906984			94.321	0.891977	0.082783	1.0094	1.02633	0.910694	0.924127	0.798397	0.822774	0.813269	0.9181	0.820256	0.991695	0.832949	0.835724
	94.895	0.873035	0.09635	0.880853	0.680173	0.971552	0.818815	0.837863	0.949882	0.79879	0.940297	0.943619	0.830169	0.812373	1.08717	0.978704	0.77007	0.795012	0.86231	0.958334	0.904539	0.74557	0.894608			94.854	0.896157	0.083732	0.983249	1.00658	0.885106	0.942876	0.804874	0.844848	0.814668	0.934166	0.826628	1.04712	0.838975	0.824792
	95.428	0.87469	0.097848	0.903719	0.679443	0.97838	0.823	0.842168	0.930773	0.76944	0.927474	0.966285	0.843438	0.806842	1.09138	0.978833	0.782398	0.80803	0.86411	0.941475	0.91261	0.734938	0.909064			95.387	0.889247	0.078471	0.930632	1.046	0.883839	0.933081	0.801651	0.840406	0.803253	0.93102	0.823326	0.995534	0.837626	0.844594
	95.961	0.869798	0.100054	0.896876	0.658249	0.962967	0.81371	0.84314	0.945145	0.78423	0.930914	0.968697	0.813839	0.789263	1.08747	0.972519	0.79296	0.801459	0.862818	0.93277	0.907983	0.725553	0.905392			95.92	0.89668	0.083619	0.967091	1.04098	0.91811	0.934541	0.819283	0.813924	0.820728	0.946654	0.814182	1.01256	0.819433	0.852685
	96.494	0.876624	0.107548	0.89387	0.689143	0.977736	0.794656	0.840029	0.930243	0.78813	0.93338	0.987656	0.822033	0.77742	1.14349	0.983516	0.808245	0.80292	0.859652	0.945136	0.926613	0.716939	0.911683			96.452	0.893404	0.077327	0.953426	1.01929	0.903988	0.91741	0.811044	0.846974	0.802212	0.944545	0.830521	1.01496	0.816427	0.860058
	97.027	0.879345	0.103219	0.897697	0.682092	0.96954	0.811758	0.841535	0.923571	0.798363	0.935205	1.0041	0.834801	0.793644	1.12332	0.980518	0.809085	0.792089	0.886384	0.957634	0.919903	0.730548	0.895114			96.985	0.906952	0.089515	1.00597	1.0631	0.946573	0.95432	0.818403	0.85496	0.789492	0.93804	0.816986	1.00336	0.841606	0.850606
	97.56	0.874775	0.103817	0.871654	0.676821	0.963903	0.815303	0.825484	0.9104	0.785028	0.938849	0.998826	0.841103	0.819289	1.1398	0.960075	0.813187	0.798531	0.864649	0.953262	0.909244	0.720342	0.88976			97.518	0.903394	0.090787	0.975913	1.06271	0.956332	0.935147	0.799439	0.839197	0.794147	0.95643	0.830303	1.00956	0.80849	0.873072
	98.094	0.873095	0.104288	0.874351	0.690748	0.9623	0.792186	0.833018	0.93074	0.78316	0.935113	0.981327	0.82521	0.819968	1.13539	0.955868	0.799112	0.792354	0.873101	0.946919	0.938312	0.706712	0.886003			98.051	0.89486	0.083256	0.935153	1.02017	0.943469	0.905428	0.797293	0.868536	0.799253	0.959308	0.825557	1.03077	0.813085	0.840296
	98.627	0.879516	0.102643	0.874333	0.685175	0.987453	0.812693	0.828509	0.933704	0.793939	0.938642	0.981867	0.856872	0.81159	1.11415	0.969463	0.812584	0.796272	0.87703	0.954043	0.946277	0.709206	0.906519			98.584	0.898481	0.087902	0.96599	1.05742	0.927817	0.921001	0.776365	0.873674	0.787746	0.949859	0.836991	1.00906	0.83366	0.84219
	99.16	0.877153	0.104758	0.870543	0.676468	0.989903	0.816966	0.849202	0.955042	0.794243	0.939911	0.968922	0.824754	0.802325	1.11418	0.976919	0.80752	0.786479	0.890359	0.965633	0.924719	0.709952	0.879014			99.117	0.898441	0.083761	0.962212	1.03224	0.914618	0.928321	0.7873	0.84899	0.820337	0.965671	0.827222	1.02035	0.812971	0.86107
	99.693	0.880963	0.105472	0.881112	0.662182	0.981286	0.813541	0.846351	0.934174	0.797093	0.932038	0.979639	0.838109	0.823429	1.13265	0.987821	0.825822	0.789176	0.884299	0.953338	0.939064	0.72207	0.896069			99.65	0.891938	0.084542	0.952042	1.01376	0.933387	0.908971	0.753299	0.85189	0.805374	0.975093	0.829395	1.00313	0.816871	0.860042
	100.226	0.878654	0.102326	0.903302	0.669197	0.965923	0.816157	0.854345	0.923075	0.793492	0.94091	0.968228	0.847506	0.813988	1.11783	0.973698	0.828323	0.790594	0.884074	0.957938	0.945437	0.709273	0.869793			100.183	0.9017	0.092777	0.982332	1.05725	0.91751	0.919423	0.779042	0.855527	0.81735	0.984426	0.823396	1.02191	0.801611	0.860621
	100.759	0.880941	0.106152	0.903291	0.670578	0.959636	0.79927	0.834835	0.950711	0.790509	0.961369	0.982375	0.839332	0.809096	1.12587	0.958183	0.836797	0.806906	0.895709	0.968887	0.943053	0.70077	0.881648			100.716	0.893599	0.083125	0.934913	1.02401	0.916456	0.920549	0.771396	0.866154	0.828783	0.960211	0.838218	1.0206	0.789562	0.852345
	101.292	0.881491	0.100381	0.885245	0.675828	0.957669	0.801608	0.855048	0.943729	0.801085	0.952904	0.992907	0.84261	0.817856	1.1093	0.973812	0.832004	0.807566	0.89443	0.963414	0.932275	0.723918	0.866621			101.249	0.900955	0.08695	0.968948	1.00909	0.926192	0.918929	0.771308	0.863986	0.838022	1.00703	0.830889	1.02331	0.79819	0.855568
	101.825	0.879603	0.105539	0.870713	0.656266	0.963025	0.811042	0.849084	0.953523	0.784589	0.943676	0.994147	0.826512	0.840959	1.12189	0.975595	0.83515	0.796872	0.889971	0.957214	0.926364	0.712319	0.883148			101.781	0.913524	0.086523	0.973604	1.05607	0.93117	0.967382	0.819124	0.88097	0.802024	0.992468	0.832375	1.0126	0.820905	0.873599
	102.358	0.881926	0.108042	0.882465	0.647243	0.959223	0.805562	0.846532	0.957802	0.795356	0.950535	1.02028	0.826597	0.82398	1.10719	0.998923	0.823127	0.806077	0.887166	0.962679	0.935329	0.717366	0.885077			102.314	0.913615	0.092018	0.960735	1.06703	0.931409	0.981344	0.799514	0.857457	0.820527	1.01096	0.853461	1.01774	0.82036	0.842845
	102.892	0.886125	0.107513	0.89279	0.666579	0.969981	0.797068	0.862143	0.95791	0.781118	0.956148	1.01218	0.84047	0.838531	1.12498	1.00259	0.832167	0.809416	0.880263	0.96825	0.919902	0.721269	0.88874			102.847	0.908487	0.093406	0.977584	1.05536	0.926084	0.962379	0.794391	0.870873	0.818479	0.993416	0.815623	1.0299	0.811184	0.846572
	103.425	0.885162	0.110165	0.892877	0.680435	0.958454	0.797829	0.84024	0.977705	0.784728	0.947109	1.0263	0.857626	0.827848	1.1424	0.997738	0.820387	0.811471	0.868283	0.952854	0.92084	0.704948	0.893176			103.38	0.910762	0.098579	0.99776	1.08144	0.914788	0.964861	0.781702	0.870913	0.820815	0.94517	0.841609	1.05564	0.828755	0.825692
	103.958	0.885015	0.110464	0.877207	0.677307	0.951748	0.775294	0.857525	0.949938	0.775992	0.962188	1.01041	0.818189	0.842522	1.13814	1.00498	0.833044	0.820858	0.887197	0.974485	0.934013	0.707865	0.901402			103.913	0.901181	0.09241	0.970616	1.0458	0.901288	0.953926	0.791899	0.876633	0.804025	0.968962	0.834713	1.03883	0.804162	0.82332
	104.491	0.8872	0.109614	0.88094	0.672938	0.961933	0.799672	0.84366	0.948541	0.777328	0.968266	1.02208	0.849314	0.826497	1.13435	0.997106	0.842935	0.810951	0.888982	0.965794	0.92956	0.708787	0.914364			104.446	0.910153	0.098067	0.980796	1.07053	0.935514	0.958939	0.797697	0.878847	0.793867	0.988958	0.832485	1.04001	0.810049	0.834137
	105.024	0.887545	0.105583	0.867025	0.682658	0.975569	0.790261	0.854284	0.965479	0.79716	0.953941	1.00801	0.82846	0.841237	1.1254	1.00099	0.840535	0.817498	0.889949	0.955687	0.924247	0.717342	0.915169			104.979	0.910907	0.097604	0.978893	1.03698	0.932459	0.974191	0.805279	0.887515	0.788214	0.986445	0.83603	1.06655	0.800771	0.837553
	105.557	0.891833	0.108554	0.86253	0.698358	0.989073	0.801588	0.858467	0.945965	0.787501	0.955505	1.03602	0.842622	0.844013	1.14496	1.00885	0.851607	0.822029	0.889468	0.964363	0.920204	0.710012	0.903521			105.512	0.914143	0.106679	0.978496	1.08937	0.930241	0.983532	0.821721	0.871082	0.795676	0.98519	0.832545	1.07087	0.783648	0.827345
	106.09	0.895047	0.106913	0.874319	0.706123	0.996435	0.814138	0.871244	0.951061	0.803625	0.958492	1.02528	0.834089	0.839633	1.13195	1.01728	0.849924	0.814489	0.884944	0.971294	0.935593	0.703383	0.917637			106.045	0.916606	0.099503	0.972577	1.07946	0.932313	0.973679	0.805272	0.877652	0.818063	1.00181	0.833682	1.05621	0.797287	0.851278
	Date: 29/4/2022																									Date: 29/4/2022
	Export: Mobile Fraction | T-half | R-square																									Export: Mobile Fraction | T-half | R-square
	Prebleach Values: 1																									Prebleach Values: 1
	Bleach Values: 0																									Bleach Values: 0
	Postbleach Values: 199																									Postbleach Values: 199
	Initial Deleted Values: 0																									Initial Deleted Values: 0
	Normalization Method: FullScale																									Normalization Method: FullScale
	Exponential Equation: Single																									Exponential Equation: Single
	filename	T-half	Mobile Fraction	R square																						filename	T-half	Mobile Fraction	R square
	10.xlsx	13.59	0.91	0.95																						20211118_1.xlsx	12.35	0.99	0.99
	11.xlsx	12.65	0.82	0.97																						20211118_2.xlsx	9.83	1	0.96
	12.xlsx	12.24	0.98	0.99																						20211118_3.xlsx	9.81	0.95	0.98
	20211118_1.xlsx	14.32	0.87	0.99																						20211118_6.xlsx	16.31	0.98	0.99
	20211118_13.xlsx	11.75	0.92	0.99																						20211118_7.xlsx	10.49	0.91	0.97
	20211118_15.xlsx	19.65	0.97	0.96																						20211118_8.xlsx	10.18	0.93	0.98
	20211118_16.xlsx	20.5	0.87	0.96																						20211213_10.xlsx	13.41	0.91	0.98
	20211118_17.xlsx	20.69	0.99	1																						20211213_11.xlsx	13.22	0.97	0.98
	20211118_2.xlsx	17.97	0.98	0.97																						20211213_12.xlsx	13.06	0.92	0.99
	20211118_3.xlsx	11.25	0.89	0.93																						20211222_13.xlsx	14.08	1	0.99
	20211118_4.xlsx	14.31	0.87	0.98																						20211222_14.xlsx	8.86	0.91	0.99
	20211118_6.xlsx	14.04	1	0.92																						20211222_15.xlsx	10.28	0.92	0.98
	20211213_18.xlsx	12.53	0.98	0.96																						Mean:	11.82	0.95
	20211213_19.xlsx	12.34	0.85	0.97																						Standard Deviation:	2.14	0.04
	20211213_20.xlsx	14.69	0.87	0.99
	20211222_21.xlsx	14.22	0.9	0.97
	20211222_22.xlsx	14.33	0.97	0.99
	20211222_23.xlsx	14.31	0.94	0.98
	7.xlsx	7.38	0.83	0.99
	8.xlsx	15.68	0.92	0.95
	Mean:	14.42	0.92
	Standard Deviation:	3.17	0.06

## Sheet: C
	Lys-GFP-KDEL
	Time (seconds)	Mean Values	Standard Deviation	1.xlsx	10.xlsx	2.xlsx	3.xlsx	4.xlsx	5.xlsx	6.xlsx	7.xlsx	8.xlsx	9.xlsx
	0	1	0	1	1	1	1	1	1	1	1	1	1
	0.281	0	0	0	0	0	0	0	0	0	0	0	0
	0.562	0.090228	0.010218	0.099832	0.081911	0.079688	0.080635	0.102842	0.087755	0.089766	0.092993	0.079617	0.107241			Date: 29/4/2022
	0.842	0.178985	0.020511	0.218164	0.153687	0.186222	0.169316	0.205442	0.170124	0.178332	0.167363	0.156267	0.184935			Export: Mobile Fraction | T-half | R-square
	1.123	0.259846	0.024293	0.309585	0.22923	0.266479	0.252159	0.283718	0.253872	0.256409	0.240877	0.233987	0.272142			Prebleach Values: 1
	1.404	0.318658	0.025316	0.369808	0.279206	0.328996	0.315728	0.337519	0.312905	0.327281	0.301559	0.291915	0.32166			Bleach Values: 0
	1.685	0.37197	0.029266	0.432204	0.331934	0.383738	0.36877	0.404561	0.35764	0.375251	0.348408	0.350305	0.366887			Postbleach Values: 240
	1.966	0.414532	0.030382	0.472793	0.375297	0.427379	0.398006	0.44289	0.396879	0.434309	0.388563	0.387911	0.421293			Initial Deleted Values: 0
	2.247	0.452559	0.03331	0.515266	0.408491	0.465376	0.431933	0.487976	0.432126	0.47335	0.427576	0.42501	0.458486			Normalization Method: FullScale
	2.527	0.480598	0.031602	0.537259	0.437416	0.494112	0.462649	0.511958	0.462262	0.499264	0.454103	0.451836	0.495122			Exponential Equation: Single
	2.808	0.514753	0.030456	0.571164	0.48178	0.532382	0.494867	0.533544	0.501089	0.536372	0.478173	0.487136	0.531021
	3.089	0.540242	0.028648	0.592177	0.500263	0.562727	0.519068	0.556114	0.521038	0.552876	0.515722	0.521812	0.560624			filename	T-half	Mobile Fraction	R square
	3.37	0.563526	0.032524	0.629127	0.523797	0.592181	0.531673	0.574299	0.55663	0.5803	0.531704	0.545972	0.569578			1.xlsx	2.87	0.98	0.95
	3.651	0.586437	0.033712	0.645582	0.540804	0.622499	0.557044	0.596645	0.578312	0.601825	0.546756	0.571641	0.603264			10.xlsx	4.11	1	0.81
	3.931	0.605787	0.03167	0.660739	0.568264	0.635527	0.571571	0.619897	0.597414	0.622672	0.570002	0.587065	0.624722			2.xlsx	3.16	1	0.98
	4.212	0.623336	0.033371	0.6779	0.583642	0.66651	0.590968	0.632931	0.615981	0.639219	0.583267	0.60493	0.638007			3.xlsx	3.07	0.96	0.94
	4.493	0.641055	0.033173	0.691092	0.600324	0.683971	0.602556	0.65252	0.640128	0.653215	0.601108	0.62646	0.659176			4.xlsx	2.77	0.97	0.97
	4.774	0.656606	0.034283	0.707109	0.609465	0.701548	0.618082	0.664349	0.654688	0.675789	0.617015	0.646949	0.671068			5.xlsx	3.57	0.98	0.97
	5.055	0.667582	0.031064	0.705877	0.633932	0.71428	0.632583	0.663448	0.672092	0.677556	0.624606	0.658936	0.692512			6.xlsx	4.35	1	0.95
	5.335	0.68228	0.031986	0.720608	0.640942	0.728442	0.641414	0.682139	0.683142	0.692073	0.644804	0.680063	0.709175			7.xlsx	5.28	1	0.95
	5.616	0.695922	0.029337	0.730909	0.651241	0.735668	0.677754	0.68509	0.693468	0.711371	0.659098	0.68945	0.725171			8.xlsx	4.1	1	0.88
	5.897	0.709037	0.023816	0.734639	0.676075	0.746442	0.693496	0.712758	0.700658	0.718593	0.674298	0.706159	0.727253			9.xlsx	3.21	1	0.76
	6.178	0.717013	0.028092	0.750397	0.691189	0.766973	0.696801	0.716521	0.700514	0.727968	0.674922	0.712587	0.732262			Mean:	3.65	0.99
	6.459	0.728284	0.029923	0.766786	0.698914	0.782064	0.713529	0.723426	0.70896	0.730026	0.685999	0.724771	0.748361			Standard Deviation:	0.76	0.01
	6.74	0.73578	0.029903	0.776793	0.707656	0.79053	0.714815	0.730837	0.723963	0.736773	0.693557	0.733505	0.749372
	7.02	0.744232	0.029853	0.777306	0.715736	0.803608	0.721489	0.738344	0.736899	0.744	0.701401	0.747549	0.755985
	7.301	0.753546	0.033932	0.7875	0.709398	0.81845	0.726818	0.756941	0.733334	0.754585	0.714248	0.766392	0.767798
	7.582	0.760159	0.033197	0.793966	0.709511	0.817363	0.732702	0.755287	0.746338	0.762578	0.726626	0.769724	0.787496
	7.863	0.765932	0.037127	0.798509	0.710963	0.828054	0.720752	0.767869	0.754292	0.767477	0.734386	0.776963	0.800052
	8.144	0.773994	0.035951	0.810371	0.720819	0.829004	0.722183	0.770134	0.769499	0.779084	0.748331	0.786688	0.80383
	8.424	0.782633	0.029374	0.814247	0.73544	0.830988	0.750411	0.775287	0.783232	0.783766	0.759373	0.787716	0.805869
	8.705	0.787412	0.02813	0.816227	0.747434	0.836106	0.752075	0.784096	0.781607	0.800936	0.76257	0.790962	0.802109
	8.986	0.792786	0.031689	0.82294	0.755856	0.844315	0.739681	0.789264	0.791639	0.805425	0.767424	0.797263	0.814058
	9.267	0.801552	0.032824	0.841702	0.761291	0.85027	0.752835	0.791722	0.797625	0.808752	0.77321	0.810779	0.827333
	9.548	0.800366	0.033367	0.831145	0.763552	0.855379	0.752129	0.797687	0.794279	0.811092	0.762554	0.809004	0.826837
	9.828	0.810525	0.033197	0.842685	0.774404	0.868414	0.763672	0.80511	0.808643	0.816794	0.776568	0.810017	0.838938
	10.109	0.812212	0.031136	0.833379	0.778136	0.875052	0.769798	0.805178	0.813594	0.820482	0.783134	0.81112	0.832251
	10.39	0.817534	0.032973	0.841632	0.786503	0.878208	0.766549	0.825616	0.818756	0.820622	0.77987	0.818489	0.839093
	10.671	0.819185	0.033662	0.844754	0.78914	0.882152	0.771676	0.821641	0.815785	0.815602	0.78122	0.819912	0.849965
	10.952	0.826719	0.038007	0.857598	0.796555	0.896052	0.769708	0.826544	0.816186	0.822859	0.790795	0.823509	0.867381
	11.233	0.832163	0.037367	0.861583	0.805992	0.894576	0.780245	0.830431	0.823783	0.831402	0.782509	0.835656	0.875449
	11.513	0.838622	0.039746	0.86372	0.811719	0.903393	0.784821	0.838023	0.828596	0.830131	0.78688	0.846874	0.892063
	11.794	0.844357	0.036459	0.867691	0.814957	0.901647	0.804433	0.839789	0.830603	0.84789	0.791466	0.849423	0.895668
	12.075	0.846242	0.034238	0.86317	0.823153	0.906491	0.81574	0.836686	0.829671	0.840794	0.796321	0.857792	0.892602
	12.356	0.853029	0.036133	0.859659	0.83657	0.918474	0.821121	0.837193	0.835931	0.851066	0.806278	0.852651	0.911349
	12.637	0.854669	0.035358	0.851502	0.84325	0.916065	0.812689	0.840524	0.837299	0.85214	0.81748	0.86063	0.915107
	12.917	0.858288	0.03747	0.859673	0.860034	0.92113	0.815878	0.843818	0.839233	0.848574	0.811471	0.861413	0.921651
	13.198	0.861615	0.037492	0.859152	0.869307	0.922058	0.817677	0.841675	0.843757	0.851676	0.811796	0.879157	0.919896
	13.479	0.865066	0.042034	0.858365	0.86874	0.933512	0.810284	0.844673	0.848103	0.851009	0.818045	0.884561	0.933371
	13.76	0.868037	0.038485	0.851706	0.88468	0.935133	0.825968	0.839651	0.856675	0.852945	0.827225	0.878557	0.927833
	14.041	0.874774	0.036984	0.854763	0.892622	0.934955	0.832816	0.856425	0.858685	0.867102	0.834218	0.878991	0.937163
	14.321	0.878195	0.041069	0.857259	0.903105	0.939379	0.828717	0.855576	0.852204	0.866885	0.842787	0.884935	0.951102
	14.602	0.88197	0.039544	0.854983	0.905847	0.93412	0.834818	0.855095	0.870261	0.865649	0.849368	0.893331	0.956228
	14.883	0.880689	0.039295	0.856933	0.910283	0.934526	0.831356	0.850648	0.866017	0.866823	0.84788	0.894243	0.948177
	15.164	0.88752	0.038098	0.861151	0.913072	0.935726	0.845812	0.856985	0.870049	0.868959	0.863165	0.899786	0.960497
	15.445	0.891477	0.04143	0.867489	0.922141	0.945414	0.841722	0.860013	0.873895	0.867999	0.865141	0.90283	0.968122
	15.726	0.894674	0.043137	0.868322	0.923731	0.947755	0.840151	0.859584	0.878199	0.875431	0.870886	0.905119	0.977559
	16.006	0.895441	0.047255	0.865282	0.934451	0.951951	0.827099	0.867223	0.8817	0.885128	0.859027	0.90138	0.981168
	16.287	0.89781	0.048484	0.872214	0.923445	0.952617	0.829186	0.865659	0.884618	0.889841	0.858683	0.907982	0.993859
	16.568	0.902614	0.046603	0.873972	0.9282	0.952335	0.833613	0.875087	0.890262	0.890818	0.870527	0.916101	0.995228
	16.849	0.907067	0.04534	0.881689	0.940464	0.955367	0.848877	0.875315	0.88498	0.903296	0.868227	0.916415	0.996043
	17.13	0.908407	0.050121	0.879557	0.955379	0.960365	0.830402	0.879286	0.885328	0.893939	0.879839	0.920883	0.999093
	17.41	0.910567	0.047437	0.879043	0.961257	0.958667	0.831217	0.879456	0.887933	0.907702	0.885094	0.930187	0.98511
	17.691	0.912235	0.050347	0.884081	0.970123	0.963107	0.817611	0.88397	0.897362	0.897572	0.897904	0.923873	0.986745
	17.972	0.913386	0.047305	0.879588	0.971442	0.956545	0.82974	0.882276	0.893643	0.908081	0.906054	0.920458	0.986039
	18.253	0.919171	0.050595	0.883467	0.983329	0.956687	0.828504	0.883794	0.906182	0.90799	0.912123	0.931218	0.998414
	18.534	0.919812	0.050949	0.877428	0.982863	0.956596	0.832039	0.890806	0.900332	0.904214	0.915206	0.936553	1.00208
	18.814	0.923891	0.049172	0.885365	0.981024	0.965072	0.839737	0.887957	0.900624	0.908617	0.923498	0.948554	0.998461
	19.095	0.925362	0.053021	0.88895	0.989172	0.958786	0.839279	0.896426	0.89316	0.903103	0.917061	0.951455	1.01622
	19.376	0.928924	0.053851	0.895685	0.98769	0.97031	0.832625	0.910291	0.900239	0.91178	0.91169	0.948238	1.02069
	19.657	0.931618	0.050294	0.913444	0.99535	0.968764	0.840234	0.906401	0.90599	0.918315	0.909035	0.946836	1.01181
	19.938	0.934924	0.050385	0.909947	0.994857	0.979795	0.848461	0.898939	0.913151	0.925467	0.908569	0.957016	1.01304
	20.219	0.93686	0.051145	0.90244	0.99346	0.975912	0.84595	0.909205	0.915982	0.930126	0.912452	0.963749	1.01932
	20.499	0.93499	0.055297	0.901661	0.987168	0.984023	0.835262	0.912898	0.915159	0.926121	0.906711	0.949067	1.03183
	20.78	0.934269	0.056215	0.899879	0.989025	0.983489	0.826434	0.917171	0.909142	0.930566	0.908729	0.953066	1.02519
	21.061	0.936833	0.055939	0.902433	0.988672	0.981855	0.839504	0.923228	0.905895	0.932433	0.908733	0.94494	1.04064
	21.342	0.939388	0.055494	0.902102	0.990912	0.982438	0.848502	0.908997	0.908141	0.933957	0.919736	0.954805	1.04429
	21.623	0.94406	0.059545	0.910012	1.00386	0.979875	0.84936	0.916218	0.922548	0.921263	0.919714	0.953324	1.06443
	21.903	0.945766	0.063083	0.914669	1.00142	0.979813	0.834251	0.922001	0.938925	0.920621	0.924099	0.947881	1.07397
	22.184	0.941842	0.060805	0.920033	1.00223	0.974296	0.836799	0.91171	0.938065	0.923348	0.911508	0.936716	1.06372
	22.465	0.946324	0.062619	0.923193	0.998325	0.980401	0.840155	0.914749	0.936261	0.921546	0.927076	0.942837	1.0787
	22.746	0.949083	0.06231	0.918247	0.999074	0.981032	0.839769	0.921729	0.939941	0.936201	0.915977	0.962285	1.07658
	23.027	0.95019	0.062456	0.920592	0.993925	0.9831	0.828773	0.922155	0.948104	0.936385	0.937263	0.957776	1.07383
	23.308	0.9483	0.064069	0.93217	0.98784	0.982978	0.825377	0.922453	0.937227	0.927986	0.935761	0.950845	1.08036
	23.588	0.948975	0.06375	0.929296	1.00034	0.989052	0.825436	0.921842	0.930131	0.928907	0.935611	0.957978	1.07116
	23.869	0.949716	0.061598	0.929157	1.00042	0.985202	0.832893	0.924628	0.927355	0.929039	0.941065	0.957002	1.07039
	24.15	0.954992	0.061683	0.92789	1.00935	0.986954	0.837453	0.931212	0.942891	0.929818	0.948776	0.961026	1.07456
	24.431	0.955309	0.056562	0.923156	1.00722	0.988572	0.855084	0.922495	0.928591	0.943332	0.952699	0.967953	1.06399
	24.712	0.955301	0.057346	0.920233	1.00805	0.988371	0.854972	0.915938	0.937202	0.943062	0.95231	0.966858	1.06601
	24.992	0.960318	0.057484	0.928738	1.0086	0.996166	0.855454	0.927196	0.940198	0.941612	0.960932	0.97401	1.07028
	25.273	0.961329	0.058626	0.924017	1.02401	0.997983	0.858027	0.930575	0.937616	0.935532	0.963205	0.975013	1.06731
	25.554	0.960664	0.059481	0.920651	1.03269	0.996871	0.8666	0.93015	0.927048	0.93528	0.954953	0.972072	1.07032
	25.835	0.959955	0.060326	0.910594	1.02062	0.996622	0.863091	0.936502	0.926291	0.9379	0.958207	0.973337	1.07639
	26.116	0.959318	0.057124	0.919762	1.00889	0.999323	0.87033	0.924101	0.934881	0.937319	0.954707	0.968814	1.07505
	26.396	0.960848	0.059694	0.914574	1.01966	0.993036	0.874775	0.92505	0.93185	0.930579	0.960138	0.976564	1.08225
	26.677	0.964727	0.056491	0.91621	1.02574	0.99372	0.891903	0.930451	0.927619	0.935611	0.966525	0.981559	1.07793
	26.958	0.967345	0.059349	0.911922	1.03278	1.00287	0.891917	0.922125	0.933856	0.941691	0.962202	0.99329	1.0808
	27.239	0.965579	0.063912	0.905198	1.0375	1.00474	0.878899	0.923619	0.925664	0.934693	0.970112	0.992016	1.08335
	27.52	0.968609	0.061018	0.909072	1.03907	1.00998	0.880135	0.928085	0.93683	0.937662	0.975515	0.996015	1.07374
	27.801	0.966549	0.061945	0.916478	1.04032	1.00375	0.864517	0.922021	0.933963	0.943487	0.97605	0.997541	1.06736
	28.081	0.966605	0.06188	0.908117	1.04257	1.00283	0.86701	0.926382	0.940569	0.939912	0.983062	0.987352	1.06824
	28.362	0.972794	0.06104	0.918087	1.05018	0.997055	0.880087	0.932991	0.936523	0.953943	0.991659	0.987153	1.08027
	28.643	0.974809	0.05981	0.926401	1.05743	0.994906	0.886674	0.934574	0.943191	0.943758	0.998934	0.984479	1.07774
	28.924	0.974926	0.05989	0.925857	1.04195	0.994461	0.883156	0.931934	0.948568	0.945796	1.00043	0.991438	1.08567
	29.205	0.975263	0.064865	0.929532	1.05055	0.986863	0.870031	0.934549	0.946599	0.949224	0.994028	0.993239	1.09801
	29.485	0.975064	0.064772	0.931242	1.05015	0.987693	0.878678	0.926365	0.949806	0.944352	0.989124	0.990227	1.10301
	29.766	0.978044	0.066167	0.933643	1.05229	0.999597	0.881353	0.926499	0.947175	0.951877	0.990691	0.986703	1.11062
	30.047	0.973517	0.064009	0.924564	1.04045	0.993314	0.877797	0.929458	0.948475	0.945553	0.981499	0.991256	1.1028
	30.328	0.976155	0.062955	0.924188	1.04499	0.988683	0.887905	0.942711	0.939048	0.947004	0.98419	0.998744	1.10408
	30.609	0.974063	0.067124	0.919004	1.04453	0.988847	0.878791	0.929801	0.945492	0.941369	0.983204	0.998695	1.1109
	30.889	0.973801	0.068492	0.92653	1.04126	0.98978	0.877522	0.924767	0.935639	0.944075	0.977965	1.00453	1.11594
	31.17	0.975688	0.06852	0.940481	1.03513	0.990305	0.870384	0.9286	0.936905	0.952333	0.981011	1.00014	1.12159
	31.451	0.975091	0.072561	0.933657	1.02805	0.984404	0.877023	0.919938	0.931897	0.95097	0.978066	1.00899	1.13792
	31.732	0.977081	0.077832	0.924532	1.04162	0.998384	0.875065	0.914024	0.931656	0.949783	0.977848	1.01116	1.14674
	32.013	0.978271	0.074996	0.920946	1.04493	0.991791	0.875597	0.917644	0.93934	0.952887	0.994379	1.00827	1.13692
	32.294	0.978785	0.073832	0.917634	1.05653	0.991514	0.873364	0.92431	0.951589	0.954304	0.985935	1.00186	1.13081
	32.574	0.976049	0.072041	0.925746	1.04526	0.995403	0.877558	0.918752	0.946028	0.953567	0.96786	0.99929	1.13102
	32.855	0.976552	0.074512	0.921798	1.0569	0.997444	0.87832	0.912458	0.939208	0.963474	0.964447	0.999781	1.13169
	33.136	0.977198	0.075239	0.929715	1.0551	1.00393	0.879145	0.901492	0.94415	0.962345	0.968131	0.9929	1.13506
	33.417	0.974634	0.074912	0.921583	1.0495	1.00615	0.87046	0.901165	0.947925	0.960832	0.96416	0.997221	1.12734
	33.698	0.976222	0.075486	0.940199	1.04912	1.00534	0.856686	0.898733	0.940256	0.966422	0.97696	1.00662	1.12188
	33.978	0.979134	0.074866	0.937676	1.05896	1.00607	0.865428	0.899209	0.948934	0.968341	0.980528	1.00317	1.12302
	34.259	0.977459	0.077792	0.927785	1.06192	1.00306	0.87192	0.902229	0.937812	0.958361	0.971619	1.0054	1.13449
	34.54	0.97469	0.078547	0.92287	1.05648	1.00507	0.868875	0.899254	0.932245	0.962566	0.965582	0.998871	1.13508
	34.821	0.973766	0.078023	0.919865	1.05241	0.991132	0.872172	0.906753	0.932567	0.956418	0.964417	1.00167	1.14026
	35.102	0.974094	0.07886	0.921637	1.05654	0.993972	0.865964	0.900489	0.931101	0.954036	0.970034	1.01505	1.13211
	35.382	0.97517	0.072804	0.936213	1.04533	0.996504	0.876724	0.900374	0.930788	0.958524	0.972436	1.01148	1.12332
	35.663	0.97768	0.074557	0.937634	1.05086	1.00241	0.874306	0.899559	0.93391	0.963132	0.97443	1.01379	1.12677
	35.944	0.981128	0.073013	0.94095	1.06076	0.995094	0.883877	0.906466	0.927863	0.970417	0.982338	1.01973	1.12379
	36.225	0.979411	0.07688	0.940793	1.0684	0.990258	0.872041	0.911417	0.924287	0.963964	0.974475	1.01843	1.13004
	36.506	0.979285	0.075484	0.945297	1.0599	0.989244	0.873837	0.905073	0.925925	0.966231	0.976939	1.02286	1.12754
	36.787	0.981008	0.075766	0.939635	1.05548	0.986716	0.884632	0.908094	0.917943	0.972488	0.990145	1.01821	1.13674
	37.067	0.977692	0.072395	0.940967	1.04919	0.982811	0.886079	0.901722	0.917991	0.975002	0.986523	1.01156	1.12508
	37.348	0.981559	0.071217	0.949057	1.05451	0.980681	0.898234	0.909675	0.921413	0.967091	0.995245	1.00839	1.1313
	37.629	0.982298	0.071872	0.965284	1.04154	0.976878	0.89872	0.909996	0.922704	0.966817	0.990092	1.00753	1.14342
	37.91	0.983958	0.069023	0.962076	1.05005	0.985404	0.892296	0.910382	0.931654	0.984634	0.987918	1.00645	1.12872
	38.191	0.981202	0.073863	0.967403	1.06487	0.978833	0.879326	0.902639	0.923464	0.979722	0.982817	1.00534	1.1276
	38.471	0.982092	0.072888	0.97313	1.06052	0.982008	0.874666	0.908395	0.922783	0.992587	0.97928	1.00201	1.12555
	38.752	0.979481	0.072033	0.967662	1.05258	0.991818	0.869901	0.904513	0.926277	0.987648	0.972909	1.00039	1.12111
	39.033	0.978201	0.075923	0.969881	1.06245	0.985856	0.857584	0.899445	0.922642	0.988139	0.974475	1.00133	1.12021
	39.314	0.977842	0.073756	0.964381	1.05943	0.990815	0.867344	0.901288	0.909601	0.987073	0.987411	0.996481	1.1146
	39.595	0.977845	0.076949	0.961585	1.06883	0.98862	0.852183	0.908843	0.912321	0.98465	0.985015	1	1.1164
	39.875	0.977164	0.077609	0.971924	1.07386	0.98383	0.84834	0.90748	0.911123	0.983555	0.977022	1.00201	1.1125
	40.156	0.976804	0.073088	0.975858	1.06792	0.983156	0.850708	0.913232	0.912384	0.985556	0.980896	0.998783	1.09954
	40.437	0.976413	0.074531	0.963418	1.06169	0.982898	0.848192	0.911446	0.912442	0.988114	0.991348	0.998053	1.10652
	40.718	0.978683	0.077564	0.974286	1.07499	0.985858	0.847989	0.907726	0.913851	0.98536	0.98192	1.00253	1.11231
	40.999	0.978917	0.07488	0.967468	1.07169	0.984535	0.859835	0.892483	0.924556	0.989027	0.988852	1.00438	1.10635
	41.28	0.979918	0.073836	0.977203	1.0695	0.982319	0.860157	0.89581	0.92783	0.991692	0.987278	0.999762	1.10763
	41.56	0.981393	0.075081	0.980762	1.07472	0.97993	0.867563	0.88946	0.927158	0.998678	0.979464	1.00517	1.11102
	41.841	0.983495	0.079731	0.971771	1.09773	0.993889	0.856885	0.895221	0.926299	0.990454	0.988658	1.00253	1.11151
	42.122	0.981619	0.079866	0.96784	1.09317	0.987468	0.850939	0.893886	0.925079	0.999687	0.981966	1.00934	1.10682
	42.403	0.985964	0.073769	0.978329	1.08352	0.988822	0.86588	0.901883	0.935906	0.995176	0.991666	1.01156	1.1069
	42.684	0.983335	0.076762	0.964727	1.07864	0.9853	0.857877	0.904879	0.925714	1.00126	0.993849	1.00565	1.11545
	42.964	0.987089	0.07782	0.972169	1.07792	0.991342	0.861057	0.907142	0.93014	0.998662	0.994305	1.01049	1.12766
	43.245	0.988801	0.078196	0.985268	1.07492	0.991452	0.850265	0.911111	0.938398	0.995309	1.00333	1.01102	1.12693
	43.526	0.989112	0.07499	0.973827	1.07949	0.989663	0.859877	0.918121	0.935826	0.999872	1.00859	1.00709	1.11876
	43.807	0.989073	0.075732	0.966242	1.09087	0.998456	0.863717	0.914834	0.932905	1.00603	1.0081	0.995724	1.11386
	44.088	0.988813	0.078917	0.961631	1.09471	1.00242	0.85776	0.914799	0.929075	1.00152	1.00676	0.999928	1.11952
	44.368	0.988936	0.07635	0.966551	1.09713	0.993358	0.865064	0.915329	0.942661	0.986495	1.00791	0.99584	1.11901
	44.649	0.989588	0.078086	0.951774	1.10555	0.998634	0.867329	0.911472	0.941979	0.987926	1.01824	0.998059	1.11491
	44.93	0.989557	0.077534	0.959136	1.10091	1.00065	0.862129	0.908576	0.948402	0.993174	1.01665	0.992246	1.1137
	45.211	0.988475	0.084845	0.959711	1.11546	1.00014	0.841868	0.899638	0.9456	0.996889	1.01582	0.996261	1.11336
	45.492	0.989016	0.083217	0.956214	1.11772	0.99973	0.859575	0.900163	0.94489	0.988954	1.00818	0.993089	1.12164
	45.773	0.987758	0.087499	0.956844	1.10645	0.993403	0.841861	0.89062	0.94681	0.987702	1.0182	1.00589	1.1298
	46.053	0.988056	0.086878	0.960853	1.11493	0.997485	0.842966	0.893123	0.945646	0.982056	1.01446	1.00657	1.12247
	46.334	0.989211	0.08092	0.956822	1.09863	1.00321	0.85542	0.90193	0.943461	0.985199	1.01622	1.01228	1.11892
	46.615	0.985685	0.084513	0.940146	1.10434	0.999165	0.852498	0.892633	0.94039	0.986976	1.00435	1.01555	1.1208
	46.896	0.986044	0.083649	0.941058	1.10476	0.998118	0.845588	0.895714	0.950155	0.992992	1.00381	1.01423	1.11402
	47.177	0.992485	0.083201	0.94631	1.10663	0.992642	0.859401	0.898042	0.954035	0.99422	1.02262	1.02886	1.12208
	47.457	0.991502	0.083579	0.942426	1.09618	0.995623	0.864553	0.887202	0.949324	0.990308	1.0302	1.03664	1.12255
	47.738	0.991483	0.088714	0.929805	1.10193	0.99638	0.858958	0.88317	0.943002	1.00179	1.02288	1.04808	1.12883
	48.019	0.991097	0.090309	0.943428	1.10935	0.991142	0.847797	0.880261	0.942192	0.998211	1.02338	1.05434	1.12087
	48.3	0.993183	0.091315	0.940194	1.11212	0.99903	0.851984	0.875915	0.947054	0.996593	1.0225	1.06719	1.11924
	48.581	0.995082	0.091883	0.943175	1.1193	0.994055	0.858498	0.876789	0.948441	0.99048	1.02469	1.07448	1.12091
	48.862	0.999584	0.087686	0.947681	1.10826	0.994224	0.866709	0.892948	0.955566	0.992832	1.03121	1.07892	1.1275
	49.142	0.998119	0.085566	0.946072	1.1155	0.988061	0.86758	0.891755	0.96384	0.990905	1.03079	1.0772	1.10949
	49.423	0.998582	0.090903	0.943305	1.12406	0.991621	0.858068	0.881403	0.966732	0.992323	1.03764	1.07604	1.11464
	49.704	0.999547	0.089416	0.940861	1.11797	0.992207	0.861668	0.890807	0.952914	0.999358	1.04396	1.09004	1.10568
	49.985	0.997208	0.088075	0.921528	1.11794	0.993591	0.867416	0.894931	0.957089	0.991427	1.04254	1.08246	1.10315
	50.266	1.00018	0.088748	0.9248	1.11987	0.991768	0.871196	0.903295	0.949188	0.993378	1.05025	1.09237	1.10569
	50.546	0.999167	0.090981	0.927249	1.12074	0.996191	0.860686	0.900861	0.9448	0.993754	1.04692	1.09946	1.10101
	50.827	1.00147	0.091864	0.925985	1.11945	0.993196	0.866169	0.902939	0.944619	0.995187	1.05448	1.09734	1.11539
	51.108	1.00236	0.093598	0.924902	1.12658	1.0031	0.866349	0.898005	0.94258	1.00147	1.04488	1.09409	1.12164
	51.389	1.00147	0.09198	0.92761	1.1209	0.998334	0.865672	0.897805	0.944972	1.00012	1.0479	1.0968	1.11457
	51.67	1.0067	0.08963	0.929176	1.1277	1.00254	0.894032	0.899294	0.942817	1.00388	1.04735	1.0982	1.12198
	51.95	1.00782	0.088025	0.933975	1.13204	1.00025	0.891137	0.897098	0.963518	1.00238	1.04542	1.09705	1.1153
	52.231	1.00823	0.087243	0.938891	1.13157	1.00737	0.897517	0.886729	0.969531	0.998665	1.04232	1.10099	1.10876
	52.512	1.00982	0.087956	0.934989	1.14152	0.997884	0.905231	0.893065	0.970623	0.996102	1.04407	1.11176	1.10298
	52.793	1.01009	0.085034	0.940752	1.13966	0.996794	0.929624	0.885527	0.973996	0.988847	1.03049	1.11546	1.09976
	53.074	1.01021	0.085072	0.940441	1.13037	1.00586	0.936675	0.87201	0.962621	0.994672	1.05725	1.1069	1.09527
	53.355	1.01304	0.086165	0.939714	1.12544	1.01246	0.937371	0.876051	0.961525	0.994029	1.06741	1.11908	1.09731
	53.635	1.01228	0.087891	0.941695	1.13896	1.00632	0.941937	0.870548	0.956596	0.996135	1.05646	1.11514	1.09905
	53.916	1.01287	0.087076	0.953178	1.13913	1.00658	0.93251	0.874317	0.959147	0.992479	1.06195	1.11991	1.08952
	54.197	1.0129	0.086182	0.955084	1.14594	1.00375	0.946734	0.872635	0.948955	0.999501	1.05527	1.11128	1.08989
	54.478	1.01598	0.083373	0.961175	1.13691	1.00398	0.957686	0.876248	0.953343	0.998915	1.07334	1.11553	1.0827
	54.759	1.01452	0.081364	0.946085	1.12756	1.0081	0.957982	0.880718	0.954963	1.01141	1.05849	1.12115	1.0787
	55.039	1.01684	0.079594	0.944926	1.12468	1.00155	0.981361	0.878528	0.96601	1.00861	1.06031	1.12137	1.08107
	55.32	1.01515	0.084266	0.944041	1.13409	1.00985	0.950512	0.873643	0.971545	1.00813	1.04975	1.12942	1.08048
	55.601	1.01642	0.08384	0.947716	1.13913	1.01401	0.945536	0.877291	0.973751	1.00692	1.05243	1.12179	1.08561
	55.882	1.01911	0.085761	0.946572	1.14986	1.01615	0.956177	0.882003	0.97358	1.00074	1.04191	1.13286	1.09121
	56.163	1.02046	0.085743	0.944019	1.15051	1.01291	0.954104	0.886598	0.973167	1.01715	1.03969	1.13773	1.08875
	56.444	1.02533	0.084226	0.952759	1.16015	1.01897	0.953187	0.896965	0.981623	1.0173	1.0443	1.13152	1.09654
	56.724	1.02516	0.084483	0.954228	1.16309	1.01351	0.957348	0.896939	0.976803	1.02111	1.04146	1.13298	1.09416
	57.005	1.0245	0.087755	0.952062	1.16679	1.01488	0.945089	0.890433	0.977684	1.01709	1.05291	1.12751	1.10051
	57.286	1.02572	0.088522	0.941946	1.17298	1.01755	0.952023	0.895251	0.978485	1.02068	1.04489	1.12445	1.10896
	57.567	1.02781	0.088482	0.941946	1.17166	1.01541	0.95278	0.904208	0.978803	1.01911	1.04611	1.12609	1.12196
	57.848	1.0274	0.085489	0.950373	1.16842	1.01978	0.956597	0.911173	0.978358	1.01254	1.0286	1.12969	1.11842
	58.128	1.02873	0.087407	0.954197	1.17731	1.02125	0.954961	0.902676	0.978679	1.02897	1.02663	1.12781	1.11485
	58.409	1.02292	0.08882	0.951336	1.17466	1.03337	0.934894	0.902637	0.971666	1.01478	1.01207	1.12247	1.11127
	58.69	1.02144	0.090535	0.951374	1.17649	1.03619	0.918554	0.909047	0.96308	1.01231	1.01594	1.12255	1.10884
	58.971	1.02165	0.092429	0.954117	1.17565	1.04121	0.923168	0.90886	0.941133	1.0245	1.01013	1.13088	1.10682
	59.252	1.02125	0.089287	0.951487	1.16648	1.04151	0.91448	0.916155	0.948508	1.02522	1.01956	1.12493	1.10417
	59.532	1.02331	0.087176	0.955535	1.15755	1.04664	0.903904	0.916719	0.970085	1.02808	1.02619	1.12496	1.10345
	59.813	1.02745	0.084232	0.958993	1.16332	1.04446	0.92215	0.917188	0.989928	1.0239	1.02235	1.11496	1.11728
	60.094	1.02151	0.081877	0.957923	1.14324	1.0391	0.910211	0.919958	0.981616	1.01563	1.02094	1.11529	1.11119
	60.375	1.02259	0.088872	0.952231	1.1639	1.04183	0.90403	0.915965	0.982208	1.0102	1.01842	1.11011	1.12703
	60.656	1.02352	0.087896	0.957535	1.1625	1.0454	0.904247	0.907787	0.990881	1.01681	1.02152	1.10473	1.12379
	60.937	1.02465	0.086597	0.949095	1.15746	1.04392	0.909282	0.913039	0.992561	1.02211	1.02574	1.11172	1.12154
	61.217	1.02185	0.088011	0.951299	1.15184	1.02573	0.89109	0.9096	0.995348	1.03251	1.03198	1.11769	1.11141
	61.498	1.02351	0.084684	0.952587	1.14777	1.02649	0.906144	0.903374	1.00027	1.04113	1.03852	1.11303	1.10577
	61.779	1.02202	0.086689	0.949865	1.15376	1.02961	0.890981	0.908766	0.996764	1.03667	1.04532	1.11136	1.09712
	62.06	1.01992	0.084518	0.941778	1.14512	1.03474	0.889934	0.910649	1.00358	1.04018	1.03775	1.11098	1.08446
	62.341	1.02337	0.088051	0.948104	1.14644	1.03724	0.890636	0.901462	1.00013	1.04268	1.05152	1.12109	1.09435
	62.621	1.02571	0.090047	0.95204	1.15959	1.03296	0.892656	0.906467	0.999236	1.0362	1.04827	1.12975	1.09991
	62.902	1.02605	0.090744	0.950355	1.1679	1.02482	0.889828	0.910108	1.0023	1.03557	1.0574	1.1198	1.10242
	63.183	1.03056	0.089158	0.96185	1.16947	1.02789	0.901825	0.909076	0.996637	1.04768	1.0659	1.10884	1.11639
	63.464	1.02633	0.089109	0.966688	1.15462	1.03096	0.90033	0.899722	0.978987	1.03807	1.06389	1.11421	1.11581
	63.745	1.02647	0.091983	0.966486	1.15312	1.03371	0.896535	0.891809	0.977729	1.043	1.06218	1.12156	1.11852
	64.025	1.02899	0.091642	0.969371	1.14259	1.0299	0.893043	0.902474	0.974956	1.04362	1.08377	1.12066	1.12949
	64.306	1.03425	0.093228	0.972951	1.15861	1.0306	0.894506	0.908589	0.987152	1.04353	1.08399	1.12607	1.13652
	64.587	1.03495	0.093051	0.979221	1.14187	1.03704	0.895417	0.900074	0.991007	1.04225	1.08867	1.13315	1.14084
	64.868	1.03649	0.090726	0.980834	1.13336	1.04203	0.898593	0.905734	0.996243	1.04613	1.08168	1.12975	1.15052
	65.149	1.03468	0.091649	0.975928	1.13891	1.04213	0.892277	0.91005	0.995741	1.03698	1.07447	1.13512	1.14523
	65.43	1.03183	0.087802	0.980255	1.1278	1.04048	0.901691	0.908589	0.981919	1.03821	1.06972	1.12675	1.1429
	65.71	1.03273	0.091483	0.980368	1.13441	1.03928	0.878114	0.910745	1.00202	1.03976	1.07531	1.12297	1.14437
	65.991	1.03564	0.090245	0.982132	1.14705	1.04308	0.897054	0.905468	0.999388	1.04367	1.07264	1.12527	1.14068
	66.272	1.03399	0.090577	0.978835	1.15237	1.04146	0.895143	0.909896	0.991262	1.04218	1.06528	1.12606	1.13742
	66.553	1.03277	0.089234	0.994479	1.14074	1.04393	0.901425	0.899296	0.987519	1.03238	1.05973	1.13817	1.13006
	66.834	1.03619	0.088983	0.994577	1.151	1.05131	0.918175	0.902389	0.980416	1.03541	1.05169	1.13677	1.14021
	67.114	1.03351	0.094035	0.986714	1.15973	1.05061	0.902511	0.894196	0.979974	1.04116	1.04574	1.13496	1.1395
	67.395	1.03575	0.092911	1.00319	1.16525	1.05205	0.91211	0.886592	0.993889	1.03142	1.04012	1.13619	1.13667
