# Supplementary material for: Endoplasmic reticulum membranes are continuously required to maintain mitotic spindle size and forces
Source: Life Sci Alliance. 2022 Nov 15;6(1):e202201540. doi: 10.26508/lsa.202201540 (PMC9671068; doi:10.26508/lsa.202201540)
Supplement: Supplementary file 11 [file LSA-2022-01540_SdataF4.2.xlsx]

## Sheet: 20211022
			20211022_afterUbch10c114sandTubA647_aftercytATL_e9															lenght
			1	C3-20211022_afterUbch10c114sandTubA647_aftercytATL_e9-1.tif:20	0.3505	183	31.0483	134	233	82.5100	44.9920	0	64.1349	189	2928	0	65535	2.2200
			2	C3-20211022_afterUbch10c114sandTubA647_aftercytATL_e9-1.tif:20	0.2848	158.0769	36.1397	125	262	65.5640	67.3400	-30.9638	45.0127	149	2055	0	65535	1.7260
			3	C3-20211022_afterUbch10c114sandTubA647_aftercytATL_e9-1.tif:20	0.2190	152.6000	24.7710	128	196	52.4660	103.8960	-122.0054	33.4255	150	1526	0	65535	1.3962
			4	C3-20211022_afterUbch10c114sandTubA647_aftercytATL_e9-1.tif:20	0.3067	161.3571	29.0321	121	222	39.3680	89.3920	-108.4349	49.4811	157	2259	0	65535	1.8721
			20211022_afterUbch10c114sTubA647_aftercytATL_e2
			1	C3-20211022_afterUbch10c114sTubA647_aftercytATL_e2.tif:20	0.2848	175.2308	23.2814	133	223	104.4510	63.2700	-19.1790	49.8973	175	2278	0	65535	1.8020
			2	C3-20211022_afterUbch10c114sTubA647_aftercytATL_e2.tif:20	0.2628	176.9167	38.4766	116	239	73.0380	88.7630	35.8377	46.5022	180	2123	0	65535	1.6431
			3	C3-20211022_afterUbch10c114sTubA647_aftercytATL_e2.tif:20	0.2190	139.8000	22.9724	107	184	58.9780	54.4640	0.0000	30.6218	148	1398	0	65535	1.3320

## Sheet: 20211115
			20211115_ERYFP_BetaTubulinRFP_afterUbch10c114s40mgml_afterbuffer_e1															length
			1	C2-20211115_ERYFP_BetaTubulinRFP_afterUbch10c114s40mgml_afterbuffer_e1.tif:11	0.0876	388.5000	47.8922	350	450	98.5680	67.8580	29.7449	34.0388	403	1554	0	65535	0.3977
			2	C2-20211115_ERYFP_BetaTubulinRFP_afterUbch10c114s40mgml_afterbuffer_e1.tif:11	0.0657	445.6667	32.7159	408	467	105.5733	56.8567	53.1301	29.2856	462	1337	0	65535	0.2467
			3	C2-20211115_ERYFP_BetaTubulinRFP_afterUbch10c114s40mgml_afterbuffer_e1.tif:11	0.0876	442.2500	16.9583	423	457	80.2530	61.4200	-90.0000	38.7482	456	1769	0	65535	0.4440
			4	C2-20211115_ERYFP_BetaTubulinRFP_afterUbch10c114s40mgml_afterbuffer_e1.tif:11	0.0438	391.5000	28.9914	371	412	66.2855	74.7770	-21.8014	17.1508	412	783	0	65535	0.1993

## Sheet: 20211116
																		length
			1	C2-20211116_ERYFP_BetaTubulinRFP_afterUbch10c114s40mgml_afterbuffer_e2-1.tif:20	0.0438	448	84.8528	388	508	99.7767	62.9987	-90	19.6260	508	896	0	65535	0.1480
			2	C2-20211116_ERYFP_BetaTubulinRFP_afterUbch10c114s40mgml_afterbuffer_e2-1.tif:20	0.0657	395	7.9373	389	404	92.5740	71.3360	-90	25.9562	392	1185	0	65535	0.2467
			3	C2-20211116_ERYFP_BetaTubulinRFP_afterUbch10c114s40mgml_afterbuffer_e2-1.tif:20	0.0876	303.5000	14.4799	288	323	71.1880	76.5345	-30.2564	26.5915	302	1214	0	65535	0.5140
			1	C2-20211116_ERYFP_BetaTubulinRFP_afterUbch10c114s40mgml_afterbuffer_e3.tif:20	0.0876	280.7500	68.9075	226	381	93.5175	68.0060	-67.3801	24.5982	267	1123	0	65535	0.4810
			2	C2-20211116_ERYFP_BetaTubulinRFP_afterUbch10c114s40mgml_afterbuffer_e3.tif:20	0.0876	265.5000	19.1224	237	277	66.8775	73.8890	-67.3801	23.2621	276	1062	0	65535	0.4810
			3	C2-20211116_ERYFP_BetaTubulinRFP_afterUbch10c114s40mgml_afterbuffer_e3.tif:20	0.1095	285.2000	18.5661	264	315	59.7550	92.2780	-50.1944	31.2351	284	1426	0	65535	0.5780

## Sheet: 20211125
			C3-20211125_Ubch10c114s_afterbuffer_e6															length
			1	C3-20211125_Ubch10c114s_afterbuffer_e6.tif:18	0.0657	241.3333	29.7041	208	265	98.5125	76.9045	35.5377	15.8585	251	724	0	65535	0.3183
			2	C3-20211125_Ubch10c114s_afterbuffer_e6.tif:18	0.1533	203.7143	33.0339	139	235	72.4830	54.7230	-105.2551	31.2351	212	1426	0	65535	0.8437
			3	C3-20211125_Ubch10c114s_afterbuffer_e6.tif:18	0.1095	263.8000	50.8154	212	336	70.0410	77.4040	-150.2551	28.8914	268	1319	0	65535	0.5966
			20211125_afterUbch10c114s_cytATL_e8
			1	C3-20211125_afterUbch10c114s_cytATL_e8.tif:20	0.1971	329.3333	31.6346	300	383	110.6300	67.4880	-90	64.9235	312	2964	0	65535	1.2333
			2	C3-20211125_afterUbch10c114s_cytATL_e8.tif:20	0.1533	298.0000	41.5572	262	361	89.4660	83.9653	-34.5085	45.6917	283	2086	0	65535	0.9579
			3	C3-20211125_afterUbch10c114s_cytATL_e8.tif:20	0.2848	302.6154	56.9511	233	417	106.2640	85.2480	90.0000	86.1703	288	3934.0000	0	65535	1.7760
																		pixels	micron
			1	C3-20211125_Ubch10c114s_afterbuffer_e2.tif:20	3	385	35.1568	345	411	651.5000	427.1667	-90	1155	399	1155	0	65535	2	0.296
			2	C3-20211125_Ubch10c114s_afterbuffer_e2.tif:20	3	418	19.0788	406	440	834.5000	529.1667	-71.5651	1254	408	1254	0	65535	2.1082	0.312014
			3	C3-20211125_Ubch10c114s_afterbuffer_e2.tif:20	3	328.3333	11.9304	320	342	615.5000	582.1667	-45.0000	985	323	985	0	65535	1.8856	0.279069

## Sheet: 20211126
			C3-20211126_afterUbch10c114s_buffer_e6															length
			4	C3-20211126_afterUbch10c114s_buffer_e6.tif:20	0.0876	249.5000	11.1206	233	257	91.1433	63.1467	-39.8056	21.8602	255	998	0	65535	0.3853
			5	C3-20211126_afterUbch10c114s_buffer_e6.tif:20	0.0876	263.0000	19.4079	242	289	90.3047	77.0340	0.0000	23.0430	261	1052	0	65535	0.4933
			6	C3-20211126_afterUbch10c114s_buffer_e6.tif:20	0.0657	232.3333	25.4820	203	249	60.7417	95.5710	-28.3008	15.2671	245	697	0	65535	0.3642
			C3-20211126_afterUbch10c114s_cytATL_e3
			1	C3-20211126_afterUbch10c114s_cytATL_e3.tif:20	0.2409	175.5455	30.6149	108	221	84.9767	54.4887	-90	42.2966	185	1931.0000	0	65535	1.4800
			2	C3-20211126_afterUbch10c114s_cytATL_e3.tif:20	0.2409	185.9091	28.5743	150	246	73.3340	41.1687	28.3008	44.7937	180	2045.0000	0	65535	1.4568
			3	C3-20211126_afterUbch10c114s_cytATL_e3.tif:20	0.2409	193.5455	18.6728	163	216	91.1680	85.3220	66.0375	46.6336	200	2129.0000	0	65535	1.4576

## Sheet: 20211208
			1	C1-20211208_BetaTubulinRFP_ERYFP_R26_363CIDGFP_Ubch10c114s40mgml_buffer_e5.tif:20	0.0876	250.5000	26.9629	217	280	98.1240	64.0840	-66.8014	21.9478	262	1002	0	65535	0.3757
			2	C1-20211208_BetaTubulinRFP_ERYFP_R26_363CIDGFP_Ubch10c114s40mgml_buffer_e5.tif:20	0.0657	279.0000	19.3132	258	296	88.7260	81.0115	-20.5560	18.3336	283	837	0	65535	0.3161
			3	C1-20211208_BetaTubulinRFP_ERYFP_R26_363CIDGFP_Ubch10c114s40mgml_buffer_e5.tif:20	0.1095	256.4000	18.9816	233	285	67.7347	61.7160	-135.0000	28.0809	258	1282	0	65535	0.6279

## Sheet: 20211215
			C2-20211215_afterUbch10c114s_cytATL_e1															length
			1	C2-20211215_afterUbch10c114s_cytATL_e1.tif:21	0.1752	430.1250	30.9167	392	487	98.8640	56.8320	-26.5651	75.3717	429	3441	0	65535	0.9928
			2	C2-20211215_afterUbch10c114s_cytATL_e1.tif:21	0.0657	408.0000	23.4307	393	435	77.9467	62.8383	-34.9920	26.8105	396	1224	0	65535	0.3011
			3	C2-20211215_afterUbch10c114s_cytATL_e1.tif:21	0.0876	415.0000	41.0853	361	459	78.0515	96.7735	-111.0375	36.3606	429	1660	0	65535	0.5154
			C2-20211215_afterUbch10c114s_cytATL_e2
			1	C2-20211215_afterUbch10c114s_cytATL_e2.tif:20	0.1095	397.6000	19.4885	368	415	66.5260	57.4980	-30.9638	43.5452	403	1988	0	65535	0.5753
			2	C2-20211215_afterUbch10c114s_cytATL_e2.tif:20	0.0876	360.2500	33.7873	320	402	59.8413	73.5807	-12.5288	31.5637	365	1441	0	65535	0.4548
			3	C2-20211215_afterUbch10c114s_cytATL_e2.tif:20	0.0438	401.0000	19.7990	387	415	54.0200	89.5647	0.0000	17.5670	415	802	0	65535	0.1480
			C2-20211215_afterUbch10c114s_cytATLbuffer_e4
			1	C2-20211215_afterUbch10c114s_cytATLbuffer_e4.tif:20	0.0438	377	5.6569	373	381	96.9955	57.0170	0	16.5156	381	754	0	65535	0.1850
			2	C2-20211215_afterUbch10c114s_cytATLbuffer_e4.tif:20	0.0657	319.3333	31.8957	284	346	117.7895	57.7847	-61.3895	20.9840	328	958	0	65535	0.2318
			3	C2-20211215_afterUbch10c114s_cytATLbuffer_e4.tif:20	0.0876	251.0000	11.3137	243	267	113.0473	85.7043	-32.7352	21.9916	251	1004	0	65535	0.4105
			C2-20211215_afterUbch10c114s_cytATLbuffer_e5
			4	C2-20211215_afterUbch10c114s_cytATLbuffer_e5.tif:20	0.0876	358.0000	40.1082	306	398	81.9920	71.5210	21.8014	31.3665	379	1432	0	65535	0.3985
			5	C2-20211215_afterUbch10c114s_cytATLbuffer_e5.tif:20	0.0876	348.0000	30.1883	317	382	76.2570	94.2760	18.4349	30.4904	364	1392	0	65535	0.4680
			6	C2-20211215_afterUbch10c114s_cytATLbuffer_e5.tif:20	0.0657	424.3333	21.5948	404	447	51.6335	93.2400	-99.4623	27.8838	422	1273	0	65535	0.2251

## Sheet: 20211229
																			length
			1	C2-20211229_Ubch10c114s_cytATL_e4.tif:21	7	298.7143	55.5869	232	387	598.2500	499.1667	-60.8025	2091	283	2091	0	65535	6.4914	0.960727
			2	C2-20211229_Ubch10c114s_cytATL_e4.tif:21	10	219.5000	27.6576	166	245	728.2500	359.0000	51.8428	2195	238	2195	0	65535	8.9022	1.31753
			3	C2-20211229_Ubch10c114s_cytATL_e4.tif:21	6	256.6667	33.5837	201	288	532.1667	298.0000	-10.6197	1540	270	1540	0	65535	5.4263	0.803092
			1	C2-20211229_Ubch10c114s_buffer_e2,tif:19	4	302.75	9.1788	295	316	537.333	435.333	-119.055	1211	301	1211	0	65535	3.4319	0.507921
			2	C2-20211229_Ubch10c114s_buffer_e2,tif:19	4	367	16.8127	349	385	620.333	501.667	54.4623	1468	377	1468	0	65535	2.8674	0.424375
			3	C2-20211229_Ubch10c114s_buffer_e2,tif:19	3	366	13	351	374	419.875	476.625	35.5377	1098	373	1098	0	65535	2.1506	0.318289

## Sheet: 20220124
																		length
			1	20220124_UbcH10C114S40mgml_buffer_e1.tif:20	0.0876	805.7500	100.9170	669	894	115.0947	80.4133	-119.0546	70.5966	868	3223	0	65535	0.5079
			2	20220124_UbcH10C114S40mgml_buffer_e1.tif:20	0.0657	945.0000	20.8806	931	969	110.4450	101.2813	-138.3665	62.0978	935	2835	0	65535	0.2970
			3	20220124_UbcH10C114S40mgml_buffer_e1.tif:20	0.0657	594.6667	58.0115	536	652	102.5887	95.5833	-90.0000	39.0767	596	1784	0	65535	0.2960
			1	20220124_UbcH10C114s_buffer_e5,tif:39	3	942	83	859	1025	650.833	430.167	18.4349	2826	942	2826	0	65535	2.1082	0.312014
			2	20220124_UbcH10C114s_buffer_e5,tif:39	2	913.5	37.4767	887	940	539.5	506.5	-90	1827	940	1827	0	65535	1	0.148
			3	20220124_UbcH10C114s_buffer_e5,tif:39	3	832.333	52.2143	795	892	790.917	274.417	-5.1944	2497	810	2497	0	65535	1.8409	0.272453
			1	20220124_UbcH10C114S40mgml_cytATL_e3.tif:39	0.2190	522.8000	116.2314	388	726	116.7350	79.5130	36.2538	114.5141	521	5228	0	65535	1.3765
			2	20220124_UbcH10C114S40mgml_cytATL_e3.tif:39	0.2190	591.1000	64.1845	490	681	85.2480	101.6390	-64.7989	129.4745	572	5911	0	65535	1.3903
			3	20220124_UbcH10C114S40mgml_cytATL_e3.tif:39	0.1971	572.0000	99.8999	457	799	68.7830	85.1740	-7.5946	112.7618	552	5148	0	65535	1.1198
			1	20220124_UbcH10C114S40mgml_cytATL_e4.tif:39	5	991.4000	90.3454	924	1137	674.3333	451.5000	0	4957	948	4957	0	65535	4.3333	0.641328
			2	20220124_UbcH10C114S40mgml_cytATL_e4.tif:39	5	969.6000	84.5890	876	1105	546.5000	363.3333	-70.0169	4848	964	4848	0	65535	3.9016	0.577437
			3	20220124_UbcH10C114S40mgml_cytATL_e4.tif:39	7	699.7143	106.5046	545	835	357.1667	702.3333	21.2505	4898	733	4898	0	65535	6.4377	0.95278

## Sheet: 20220203
																			length
			1	C2-20220203_UbcH10C114S_ cytATL_e4,tif:20	11	714.727	160.565	577	1094	554.5	540.167	-19.6538	7862	635	7862	0	65535	9.9107	1.46678
			2	C2-20220203_UbcH10C114S_ cytATL_e4,tif:20	12	733.667	108.345	613	937	420.5	634.833	34.6952	8804	734	8804	0	65535	10.5409	1.56005
			3	C2-20220203_UbcH10C114S_ cytATL_e4,tif:20	10	709.5	90.5946	596	854	549.667	417.833	-109.094	7095	739	7095	0	65535	9.1712	1.35734
			4	C2-20220203_UbcH10C114S_ buffer_e3,tif:20	2	954	29.6985	933	975	564.167	443.333	-14.0362	1908	975	1908	0	65535	1.3744	0.203411
			5	C2-20220203_UbcH10C114S_ buffer_e3,tif:20	2	1278	148.492	1173	1383	661.833	355.833	-45	2556	1383	2556	0	65535	0.9428	0.139534
			6	C2-20220203_UbcH10C114S_ buffer_e3,tif:20	4	868	86.3327	762	954	244.5	563.5	-90	3472	920	3472	0	65535	2.6667	0.394672

[truncated: 1 more sheets: 20220314]
