# Supplementary material for: Endoplasmic reticulum membranes are continuously required to maintain mitotic spindle size and forces
Source: Life Sci Alliance. 2022 Nov 15;6(1):e202201540. doi: 10.26508/lsa.202201540 (PMC9671068; doi:10.26508/lsa.202201540)
Supplement: Supplementary file 12 [file LSA-2022-01540_SdataF4.3.xlsx]

## Sheet: Sheet1
		number of spindles with spindle pole disengagement																	distance between centrioles?
			embryo		cytATL														length
				1	20211022_C3-afterUbch10c114sTubA647_aftercytATL_e2.tif:21	0.3943	175.4444	112.7721	0	255	76.8120	37.9620	-32.7352	69.1728	255	3158	0	255	2.4632
				2	20211022_C3-afterUbch10c114sTubA647_aftercytATL_e2.tif:21	0.3505	196.1250	98.0856	0	255	76.2200	57.2020	3.8141	68.7348	255	3138	0	255	2.2249
				3	20211022_C3-afterUbch10c114sTubA647_aftercytATL_e2.tif:21	0.3067	255.0000	0.0000	255	255	51.5780	80.8080	38.6598	78.1973	255	3570	0	255	1.8953
				4	20211022_C3-afterUbch10c114sTubA647_aftercytATL_e2.tif:21	0.3067	226.7857	71.4382	17	255	49.3950	38.2950	25.5600	69.5452	255	3175	0	255	1.8866
				5	20211022_C3-afterUbch10c114sTubA647_aftercytATL_e2.tif:21	0.3724	122.2353	122.6629	0	255	59.6810	93.1537	-18.4349	45.5165	97	2078	0	255	2.4181
					cytATL
				1	20211022_C3-afterUbch10c114sandTubA647_aftercytATL_e9-2.tif:20	0.8981	186.0732	29.6078	134	262	77.7740	75.4800	64.7223	167.1056	183	7629	0	65535	5.8922
				2	20211022_C3-afterUbch10c114sandTubA647_aftercytATL_e9-2.tif:19	0.8762	170.4250	24.5073	127	223	50.8380	55.9440	-76.6755	149.3196	168	6817	0	65535	5.7796
				3	20211022_C3-afterUbch10c114sandTubA647_aftercytATL_e9-2.tif:20	1.0952	173.1200	31.8124	116	274	62.1600	90.4280	9.4623	189.6010	174	8656	0	65535	7.2020
				4	20211022_C3-afterUbch10c114sandTubA647_aftercytATL_e9-2.tif:20	0.7447	168.9118	27.8822	108	239	45.6580	74.4440	-74.2914	125.7947	168	5743	0	65535	4.9197
					buffer
				1	C2-20211116_ERYFP_BetaTubulinRFP_afterUbch10c114s40mgml_afterbuffer_e3.tif:20	0.2409	255	0	255	255	28.3420	85.3220	-66.0375	61.4407	255	2805	255	255	1.4576
				2	C2-20211116_ERYFP_BetaTubulinRFP_afterUbch10c114s40mgml_afterbuffer_e3.tif:20	0.2409	255	0	255	255	52.0220	80.3270	-59.5345	61.4407	255	2805	255	255	1.4595
				3	C2-20211116_ERYFP_BetaTubulinRFP_afterUbch10c114s40mgml_afterbuffer_e3-1.tif:20	0.2190	429.7000	52.1622	352	491	97.9390	82.6950	49.7636	94.1215	451	4297	0	65535	1.2602
				4	C2-20211116_ERYFP_BetaTubulinRFP_afterUbch10c114s40mgml_afterbuffer_e3-1.tif:20	0.2190	301.4000	31.2275	236	353	64.1333	60.1867	6.3402	66.0187	310	3014	0	65535	1.3402
					buffer
				1	C2-20211116_ERYFP_BetaTubulinRFP_afterUbch10c114s40mgml_afterbuffer_e2-1.tif:20	0.1314	490	46.6948	430	545	101.4540	49.6910	-49.3987	64.3978	496	2940	0	65535	0.6822
				2	C2-20211116_ERYFP_BetaTubulinRFP_afterUbch10c114s40mgml_afterbuffer_e2-1.tif:20	0.0438	427.5000	26.1630	409	446	92.7590	70.2630	-45.0000	18.7279	446	855	0	65535	0.1047
				3	C2-20211116_ERYFP_BetaTubulinRFP_afterUbch10c114s40mgml_afterbuffer_e2-1.tif:20	0.1095	455.2000	66.8633	401	569	72.0760	76.7750	74.0546	49.8535	438	2276	0	65535	0.5387
				4	C2-20211116_ERYFP_BetaTubulinRFP_afterUbch10c114s40mgml_afterbuffer_e2-1.tif:20	0.1533	449.0000	42.9108	376	519	58.3120	94.6707	-3.0128	68.8443	446	3143	0	65535	0.9386
					cytATL
				1	20211123_afterUbch10c114s30mgml_cytATL_e3.tif:20	0.3943	308.9444	36.9044	240	382	98.2720	63.3810	-11.6336	121.8082	308	5561	0	65535	2.5688
				2	20211123_afterUbch10c114s30mgml_cytATL_e3.tif:20	0.2409	285.1818	45.9039	180	341	97.8650	45.1400	-11.8887	68.7129	278	3137	0	65535	1.4368
				3	20211123_afterUbch10c114s30mgml_cytATL_e3.tif:20	0.1752	314.0000	22.0519	286	353	69.1160	48.8400	33.6901	55.0229	320	2512	0	65535	1.0672
				4	20211123_afterUbch10c114s30mgml_cytATL_e3.tif:20	0.1533	316.8571	45.7144	249	375	87.1720	89.9100	51.3402	48.5831	306	2218	0	65535	0.9477
					buffer
				1	DUP_C3-20211123_afterUbch10c114s30mgml_TubA6471.25mgml_buffer_e1.tif:19	0.1752	346.7500	33.7035	305	390	93.9800	47.7300	-74.0546	60.7617	354	2774	0	65535	1.0775
				2	DUP_C3-20211123_afterUbch10c114s30mgml_TubA6471.25mgml_buffer_e1.tif:19	0.3067	333.5714	53.0119	215	392	70.2260	35.7420	57.5288	102.2917	344	4670	0	65535	1.9297
				3	DUP_C3-20211123_afterUbch10c114s30mgml_TubA6471.25mgml_buffer_e1.tif:19	0.3286	316.3333	48.1006	234	428	47.8040	67.2660	-12.0948	103.9345	310	4745	0	65535	2.1190
				4	DUP_C3-20211123_afterUbch10c114s30mgml_TubA6471.25mgml_buffer_e1.tif:19	0.2190	404.8000	30.6804	365	446	67.3400	81.7700	-20.5560	88.6674	425	4048	0	65535	1.2645
				1	C3-20211125_Ubch10c114s_afterbuffer_e6.tif:18	0.1971	290.7778	26.9804	258	330	111.7400	73.4080	-75.9638	57.3228	293	2617	0	65535	1.2204
				2	C3-20211125_Ubch10c114s_afterbuffer_e6.tif:18	0.2409	245.5455	35.7473	201	309	110.5560	51.1340	-5.7106	59.1627	240	2701	0	65535	1.4874
				3	C3-20211125_Ubch10c114s_afterbuffer_e6.tif:18	0.1533	274.4286	25.8963	227	299	69.2640	77.8480	-45.0000	42.0776	285	1921	0	65535	0.8372
				4	C3-20211125_Ubch10c114s_afterbuffer_e6.tif:18	0.1314	241.1667	37.9969	179	295	72.5940	56.1660	-168.6901	31.6951	253	1447	0	65535	0.7547
					buffer
				1	C3-20211126_afterUbch10c114s_buffer_e6.tif:20	0.1752	303.3750	29.3011	255	339	91.6120	76.6270	-30.2564	53.1610	305	2427	0	65535	1.0280
				2	C3-20211126_afterUbch10c114s_buffer_e6.tif:20	0.1314	288.3333	14.9488	264	307	79.2540	57.1280	-36.8699	37.8939	292	1730	0	65535	0.7400
				3	C3-20211126_afterUbch10c114s_buffer_e6.tif:20	0.1314	304.6667	20.4418	279	331	92.3890	63.4920	-33.6901	40.0405	303	1828	0	65535	0.8004
				4	C3-20211126_afterUbch10c114s_buffer_e6.tif:20	0.1095	294.8000	22.5433	263	314	59.1507	67.9567	-19.9831	32.2865	309	1474	0	65535	0.5774
					cytATL
				1	C3-20211126_afterUbch10c114s_cytATL_e3.tif:20	0.3505	215.2500	50.1896	128	315	105.4500	55.7220	11.3099	75.4374	217	3444	0	65535	2.2640
				2	C3-20211126_afterUbch10c114s_cytATL_e3.tif:20	0.4819	225.3182	38.3771	165	314	92.7220	82.0290	73.6861	108.5782	212	4957	0	65535	3.1613
				3	C3-20211126_afterUbch10c114s_cytATL_e3.tif:20	0.2848	252.5385	17.1251	224	285	84.3970	52.1700	97.1250	71.9108	251	3283	0	65535	1.7898
				4	C3-20211126_afterUbch10c114s_cytATL_e3.tif:20	0.2409	250.5455	19.6792	212	276	74.8880	39.5530	-90.0000	60.3674	259	2756	0	65535	1.4060
					cytATL
				1	C2-20211215_afterUbch10c114s_cytATL_e1.tif:21	0.1095	459.8000	20.4622	431	480	99.8630	57.4610	23.1986	50.3573	457	2299	0	65535	0.5636
				2	C2-20211215_afterUbch10c114s_cytATL_e1.tif:21	0.1314	399.5000	19.1181	379	436	95.1147	78.3167	-24.7751	52.5039	396	2397	0	65535	0.7063
				3	C2-20211215_afterUbch10c114s_cytATL_e1.tif:21	0.1314	380.8333	41.4170	338	455	78.2550	63.8250	45.0000	50.0507	366	2285	0	65535	0.7326
				4	C2-20211215_afterUbch10c114s_cytATL_e1.tif:21	0.1095	473.4000	37.2867	418	509	79.1430	87.3200	-15.9454	51.8468	467	2367	0	65535	0.5387
				1	C2-20211215_afterUbch10c114s_cytATL_e2.tif:20	0.1752	431.1250	34.9916	357	468	74.2590	63.4180	59.7436	75.5469	444	3449	0	65535	1.0280
				2	C2-20211215_afterUbch10c114s_cytATL_e2.tif:20	0.1314	377.0000	16.0499	353	399	66.4890	80.4750	29.0546	49.5468	376	2262	0	65535	0.7619
				3	C2-20211215_afterUbch10c114s_cytATL_e2.tif:20	0.1314	500.6667	60.2019	424	565	54.7970	89.3180	73.3008	65.7996	535	3004	0	65535	0.7726
				4	C2-20211215_afterUbch10c114s_cytATL_e2.tif:20	0.0876	461.0000	35.7305	419	498	70.3000	48.5440	-45.0000	40.3910	482	1844	0	65535	0.4186
				1	C2-20211215_afterUbch10c114s_cytATLbuffer_e5.tif:20	0.0876	429.2500	51.0645	354	467	96.7180	58.7930	-68.1986	37.6092	452	1717	0	65535	0.3985
				2	C2-20211215_afterUbch10c114s_cytATLbuffer_e5.tif:20	0.0876	464.5000	41.7013	406	503	82.7567	71.2620	90.0000	40.6976	482	1858	0	65535	0.4933
				3	C2-20211215_afterUbch10c114s_cytATLbuffer_e5.tif:20	0.1095	370.2000	85.5874	241	478	92.0560	79.7720	0.0000	40.5443	386	1851	0	65535	0.5920
				4	C2-20211215_afterUbch10c114s_cytATLbuffer_e5.tif:20	0.0876	398.7500	87.6256	276	468	76.8860	93.6840	0.0000	34.9369	455	1595	0	65535	0.4440
				1	20220124_UbcH10C114s_buffer_e5.tif:39	0.2190	1124.1000	129.3475	921	1309	80.4380	40.4780	-71.5651	246.2229	1097	11241	0	65535	1.4041
				2	20220124_UbcH10C114s_buffer_e5.tif:39	0.1533	1198.7143	141.3880	1060	1496	61.1240	44.8440	-45.0000	183.7965	1160	8391	0	65535	0.8372
				3	20220124_UbcH10C114s_buffer_e5.tif:39	0.1533	1095.5714	75.7515	964	1174	111.2960	61.4200	-18.4349	167.9818	1114	7669.0000	0	65535	0.9360
				4	20220124_UbcH10C114s_buffer_e5.tif:39	0.1314	1010.6667	99.6708	884	1156	83.9900	89.2440	21.8014	132.8259	1044	6064.0000	0	65535	0.7970
				1	C2-20211227_Ubch10_cytATL_01.tif:20	0.0657	443.3333	62.0511	394	513	70.7440	44.0670	14.0362	29.1323	423	1330	0	65535	0.3051
				2	C2-20211227_Ubch10_cytATL_01.tif:20	0.1095	448.4000	18.5149	427	471	53.6130	70.4480	-50.1944	49.1088	453	2242	0	65535	0.5780
				3	C2-20211227_Ubch10_cytATL_01.tif:20	0.1752	449.0000	45.9627	355	502	55.6110	34.3730	-85.6013	78.6792	458	3592	0	65535	0.9648
				4	C2-20211227_Ubch10_cytATL_01.tif:20	0.1095	438.8000	50.1518	381	495	102.4900	68.0800	-14.0362	48.0574	417	2194	0	65535	0.6102
				1	C2-20211229_Ubch10c114s_buffer_e2.tif:19	0.2409	353.6364	51.9081	289	444	92.9810	73.3340	-17.5256	85.2066	349	3890	0	65535	1.4744
				2	C2-20211229_Ubch10c114s_buffer_e2.tif:19	0.1971	356.5556	36.6064	313	433	86.8390	54.2050	-3.8141	70.2899	356	3209	0	65535	1.1125
				3	C2-20211229_Ubch10c114s_buffer_e2.tif:19	0.1752	459.3750	73.4729	344	550	64.1580	46.2870	-4.0856	80.4972	480	3675	0	65535	1.0386
				4	C2-20211229_Ubch10c114s_buffer_e2.tif:19	0.0876	453.5000	108.1249	366	606	62.6780	69.4120	0.0000	39.7339	453	1814	0	65535	0.4440
				1	C2-20220203_UbcH10C114S_ buffer_e3.tif:20	0.1971	1125.1111	136.4409	877	1297	86.9870	43.3270	108.4349	221.7999	1174	10126	0	65535	1.1700
				2	C2-20220203_UbcH10C114S_ buffer_e3.tif:20	0.1533	1228.8571	113.2040	1067	1398	69.5230	62.1970	-24.4440	188.4182	1254	8602	0	65535	0.8941
				3	C2-20220203_UbcH10C114S_ buffer_e3.tif:20	0.2409	1086.0909	216.6719	797	1425	63.7140	46.6570	83.9910	261.6871	1015	11947	0	65535	1.4138
				4	C2-20220203_UbcH10C114S_ buffer_e3.tif:20	0.2190	1190.8000	92.9896	1053	1382	81.4000	80.9560	63.4349	260.8328	1198	11908	0	65535	1.3238
				1	C2-20211229_Ubch10c114s_cytATL_e4-1.tif:21	0.1314	356.8333	33.8433	314	389	100.0850	62.3450	-60.9454	46.8965	372	2141	0	65535	0.7619
				2	C2-20211229_Ubch10c114s_cytATL_e4-1.tif:21	0.1095	386.8000	49.0122	338	459	89.2070	75.3690	8.1301	42.3623	389	1934	0	65535	0.5233
				3	C2-20211229_Ubch10c114s_cytATL_e4-1.tif:21	0.1314	377.0000	29.1616	324	406	88.3190	89.7990	-16.6992	49.5469	383	2262	0	65535	0.7726
				4	C2-20211229_Ubch10c114s_cytATL_e4-1.tif:21	0.1752	356.0000	36.7229	303	428	61.3090	33.5960	-70.3462	62.3826	348	2848	0	65535	1.1001
