# Supplementary material for: Endoplasmic reticulum membranes are continuously required to maintain mitotic spindle size and forces
Source: Life Sci Alliance. 2022 Nov 15;6(1):e202201540. doi: 10.26508/lsa.202201540 (PMC9671068; doi:10.26508/lsa.202201540)
Supplement: Supplementary file 18 [file LSA-2022-01540_SdataF5.1.xlsx]

## Sheet: Sheet1
		C1-20211125_afterUbch10c114s_cytATL_TEV_e8
		kymograph measurements
			right side					left side
			pixel			velocity		pixel			velocity	average
nucleus1	um	distance	width	23	3.404	4.86286		width	20	2.96	3.28889	4.07587
	sec	time	height	14	0.7			height	18	0.9
																range of separation	range of separation in um
	1	Plot of Kymograph-2	139.82	0	0	0	0	45.955	873.082	0	0	0	0	0	255	59.4533	8.79909
																separation time	time (min)
	1	C1-20211125_afterUbch10c114s_cytATL_TEV_e8_kym1_1to10scale,tif	34	1217.72	104.809	953.612	1330	55.5	16.25	90	41402.4	1247.88	41402.4	-3.403e+38	3.4e+38	32.5	1.625
						velocity					velocity	average
nucleus2	um	distance	width	18	2.664	3.33		width	22	3.256	4.07	3.7
	sec	time	height	16	0.8			height	16	0.8
																range of separation	range of separation in um
	1	Plot of Kymograph-1	79.8472	0	0	0	0	47.5542	598.866	0	0	0	0	0	255	51.6783	7.64839
																separation time	time (min)
	1	C1-20211125_afterUbch10c114s_cytATL_TEV_e8_kym2_1to10scale,tif	20	962.543	89.6597	750.45	1035.25	59.75	9.5	90	19250.8	1002.88	19250.8	-3.403e+38	3.4e+38	19	0.95
						velocity					velocity	average
nucleus3	um	distance	width	19	2.812	3.12444		width	18	2.664	2.53714	2.83079
	sec	time	height	18	0.9			height	21	1.05
																range of separation	range of separation in um
	2	Plot of Kymograph-4	48.1202	255	0	255	255	52	520.874	0	12270.7	255	57885	0	255	37.6667	5.57467
																separation time	time (min)
	2	C1-20211125_afterUbch10c114s_cytATL_TEV_e8_kym3_1to10scale,tif	21	418.153	56.599	323.5	491.833	63.1667	9.75	90	8781.21	420.542	8781.21	-3.403e+38	3.4e+38	19.5	0.975
						velocity					velocity	average
nucleus4	um	distance	width	19	2.812	4.01714		width	19	2.812	5.11273	4.56494
	sec	time	height	14	0.7			height	11	0.55
																range of separation	range of separation in um
	3	Plot of Kymograph-5	84.9195	0	0	0	0	51.0467	754.223	0	0	0	0	0	255	42.4667	6.28507
																separation time	time (min)
	1	C1-20211125_afterUbch10c114s_cytATL_TEV_e8_kym4_1to10scale,tif	40	1256.63	151.238	804.1	1417.31	57.5	19.25	90	50265.3	1289.83	50265.3	-3.403e+38	3.4e+38	38.5	1.925
						velocity					velocity	average
nucleus5	um	distance	width	19	2.812	3.30824		width	16	2.368	2.96	3.13412
	sec	time	height	17	0.85			height	16	0.8
																range of separation	range of separation in um
	2	Plot of Kymograph-1	114.209	0	0	0	0	46.5617	920.599	0	0	0	0	0	255	47.0167	6.95847
																separation time	time (min)
	1	C1-20211125_afterUbch10c114s_cytATL_TEV_e8_kym5_1to10scale,tif	40	1189.2	163.963	702.95	1376.63	56.1667	19.4167	90	47568.2	1223.01	47568.2	-3.403e+38	3.4e+38	38.8333	1.94166
																	1.625
																	0.95
																	0.975
																	1.925
																	1.94166

## Sheet: Sheet2
		C1-20211125_Ubch10c114s_afterbuffer_afterTEV_e6
				pixel			velocity		pixel			velocity	average
	nucleus1	um	distance	width	21	3.108	4.144		width	22	3.256	5.42667	4.78533
		sec	time	height	15	0.75			height	12	0.6
																range of separation	range of separation in um
	1	Plot of Kymograph-1	127.604	255	0	255	255	49.3783	796.81	0	32539.1	255	86700	0	255	59.89	8.86372
																separation time	separation time (min)
	1	C1-20211125_Ubch10c114s_afterbuffer_afterTEV_e6_kym1_1to10scale,tif	32	580.852	190.252	293	800.7	107.167	15.25	90	18587.3	596.417	18587.3	-3.403e+38	3.4e+38	30.5	1.525
				pixel			velocity					velocity	average
	nucleus2	um	distance	width	16	2.368	4.736		width	21	3.108	3.885	4.3105
		sec	time	height	10	0.5			height	16	0.8
																range of separation	range of separation in um
	4	Plot of Kymograph-2	127.101	255	0	255	255	54.1467	924.721	0	32410.7	255	62985	0	255	50.84	7.52432
																separation time	separation time (min)
	1	C1-20211125_Ubch10c114s_afterbuffer_afterTEV_e6_kym2_1to10scale,tif	35	973.625	90.5699	779.25	1147.33	74.8333	17.0833	90	34076.9	950.162	34076.9	-3.403e+38	3.4e+38	34.1667	1.70833
				pixel			velocity					velocity	average
	nucleus3	um	distance	width	15.22	2.25256	4.27837		width	10	1.48	2.46667	3.37252
		sec	time	height	10.53	0.5265			height	12	0.6
																range of separation	range of separation in um
	3	Plot of Kymograph-3	94.8065	255	0	255	255	52.965	741.524	0	24175.7	255	68595	0	255	47.7933	7.07341
																separation time	separation time (min)
	1	C1-20211125_Ubch10c114s_afterbuffer_afterTEV_e6_kym3_1to10scale,tif	33	669.615	109.967	471	803.891	55.5	15.75	90	22097.3	701.952	22097.3	-3.403e+38	3.4e+38	31.5	1.575
				pixel			velocity					velocity	average
	nucleus4	um	distance	width	20	2.96	4.55385		width	17	2.516	4.19333	4.37359
		sec	time	height	13	0.65			height	12	0.6
																range of separation	range of separation in um
	5	Plot of Kymograph-4	73.3203	255	0	255	255	49.98	576.28	0	18696.7	255	77775	0	255	49.6533	7.34869
																separation time	separation time (min)
	2	C1-20211125_Ubch10c114s_afterbuffer_afterTEV_e6_kym4_1to10scale,tif	42	659.519	84.0562	572	832.063	60.5	20.4167	90	27699.8	618.657	27699.8	-3.403e+38	3.4e+38	40.8333	2.04167
																	1.525
																	1.70833
																	1.575
																	2.04167

## Sheet: Sheet3
		C1-20211130_Ubch10c114s40mgml_needle68_55_buffer_TEV_e2
				pixel			velocity					velocity	average
	nucleus1	um	distance	width	11	1.628	3.256		width	14.9167	2.20767	3.39642	3.32621
		sec	time	height	10	0.5			height	13	0.65
																range of separation	range of separation in um
	7	Plot of Kymograph-1	82.3612	0	0	0	0	50.7275	681.984	0	0	0	0	0	255	46.5217	6.88521
																separation time	separation time (min)
	3	C1-20211130_Ubch10c114s40mgml_needle68_55_buffer_TEV_e2_kym1_1to10scale,tif	8	1000.95	43.7847	928.256	1040.33	78.1667	3.5833	90	8007.59	1014.32	8007.59	-3.403e+38	3.4e+38	7.1667	0.358335
					pixel		velocity					velocity	average
	nucleus2	um	distance	width	17.075	2.5271	3.41212		width	13.5	1.998	2.4936	2.95286
		sec	time	height	14.8125	0.740625			height	16.025	0.80125
																range of separation	range of separation in um
	5	Plot of Kymograph-2	147.983	246.253	46.4715	0	255	53.04	847.899	0	36441.3	255	93330	0	255	65.52	9.69696
																separation time	separation time (min)
	1	C1-20211130_Ubch10c114s40mgml_needle68_55_buffer_TEV_e2_kym2_1to10scale,tif	9	995.921	24.9433	953.917	1019.17	55.1667	3.75	90	8963.29	1002.85	8963.29	-3.403e+38	3.4e+38	7.5	0.375
							velocity					velocity	average
	nucleus3	um	distance	width	19.25	2.849	3.43667		width	14	2.072	3.48968	3.46318
		sec	time	height	16.58	0.829			height	11.875	0.59375
																range of separation	range of separation in um
	6	Plot of Kymograph-3	56.6396	246.774	45.1274	0	255	51.425	454.193	0	13977.2	255	76500	0	255	52.53	7.77444
																separation time	separation time (min)
	2	C1-20211130_Ubch10c114s40mgml_needle68_55_buffer_TEV_e2_kym3_1to10scale,tif	15	1118.57	68.2684	1001.58	1199.17	59.1667	7.0833	90	16778.6	1124.08	16778.6	-3.403e+38	3.4e+38	14.1667	0.708335
							velocity					velocity	average
	nucleus4	um	distance	width	18.125	2.6825	5.14012		width	15.1667	2.24467	3.19715	4.16864
		sec	time	height	10.4375	0.521875			height	14.0417	0.702085
																range of separation	range of separation in um
	5	Plot of Kymograph-4	194.127	255	0	255	255	63.3233	1061.19	0	49502.5	255	84405	0	255	66.55	9.8494
																separation time	separation time (min)
	3	C1-20211130_Ubch10c114s40mgml_needle68_55_buffer_TEV_e2_kym4_1to10scale,tif	16	1219.14	49.5243	1140.3	1298.51	69.1667	7.5833	90	19506.2	1211.16	19506.2	-3.403e+38	3.4e+38	15.1667	0.758335
							velocity					velocity	average
	nucleus5	um	distance	width	18	2.664	6.87484		width	8.625	1.2765	2.63876	4.7568
		sec	time	height	7.75	0.3875			height	9.675	0.48375
																range of separation	range of separation in um
	11	Plot of Kymograph-5	105.445	255	0	255	255	53.1433	793.034	0	26888.4	255	72165	0	255	50.29	7.44292
																separation time	separation time (min)
	4	C1-20211130_Ubch10c114s40mgml_needle68_55_buffer_TEV_e2_kym5_1to10scale,tif	20	1067.11	21.511	1014.44	1095.66	70.8333	9.5833	90	21342.3	1068.15	21342.3	-3.403e+38	3.4e+38	19.1667	0.958335
																	0.358335
																	0.375
																	0.708335
																	0.758335
																	0.958335

## Sheet: Sheet4
		C1-20211130_Ubch10c114s40mgml_needle68_55_cytATL_TEV_e1
								um/min
					pixel			velocity					velocity	average
		nucleus1	um	distance	width	12.625	1.8685	2.24782		width	13.125	1.9425	2.26155	2.25468
			sec	time	height	16.625	0.83125			height	17.1785	0.858925
																	range of separation	range of separation in um
		5	Plot of Kymograph-1	131.538	255	0	255	255	43.3583	1411.13	0	33542.2	255	59670	0	255	33.3967	4.94271
																	separation time	separation time (min)
		5	C1-20211130_Ubch10c114s40mgml_needle68_55_cytATL_TEV_e1_kym1_1to10scale,tif	42	1393.21	149.697	1060.73	1564.36	49.1667	20.5833	90	58514.7	1454.59	58514.7	-3.403e+38	3.4e+38	41.1667	2.05834
					pixel			velocity					velocity	average
		nucleus2	um	distance	width	17.5	2.59	2.11645		width	18.625	2.7565	2.3902	2.25332
			sec	time	height	24.475	1.22375			height	23.065	1.15325
																	range of separation	range of separation in um
		5	Plot of Kymograph-2	122.74	255	0	255	255	55.2825	1095.5	0	31298.7	255	53550	0	255	40.755	6.03174
																	separation time	separation time (min)
		6	C1-20211130_Ubch10c114s40mgml_needle68_55_cytATL_TEV_e1_kym2_1to10scale,tif	44	923.29	211.053	755.324	1403.88	64.1667	21.25	90	40624.7	804.44	40624.7	-3.403e+38	3.4e+38	42.5	2.125
					pixel			velocity					velocity	average
		nucleus3	um	distance	width	13.5625	2.00725	3.05867		width	15.5	2.294	3.07146	3.06507
			sec	time	height	13.125	0.65625			height	14.9375	0.746875
																	range of separation	range of separation in um
		5	Kymograph-3	58	1000.04	319.025	670.833	1471.82	72	28.375	90	58002.5	845.638	58002.5	-3.403e+38	3.4e+38	56.75	8.399
																	separation time	separation time (min)
		7	C1-20211130_Ubch10c114s40mgml_needle68_55_cytATL_TEV_e1_kym3_1to10scale,tif	58	871.487	202.658	520.634	1134.58	83.5	28.4167	90	50546.2	885.258	50546.2	-3.403e+38	3.4e+38	56.8333	2.84166
					pixel			velocity					velocity	average
		nucleus4	um	distance	width	14.5	2.146	3.01193		width	14.625	2.1645	1.83238	2.42216
			sec	time	height	14.25	0.7125			height	23.625	1.18125
																	range of separation	range of separation in um
		11	Plot of Kymograph-4	73.0452	246.995	44.5643	0	255	45.2767	777.243	0	18041.8	255	55080	0	255	34.78	5.14744
																	separation time	separation time (min)
		8	C1-20211130_Ubch10c114s40mgml_needle68_55_cytATL_TEV_e1_kym4_1to10scale,tif	60	1127.3	168.8	819	1332.8	73	29.25	90	67638.2	1172.53	67638.2	-3.403e+38	3.4e+38	58.5	2.925
					pixel			velocity					velocity	average
		nucleus5	um	distance	width	19.25	2.849	2.02296		width	16.75	2.479	2.45851	2.24073
			sec	time	height	28.1667	1.40833			height	20.1667	1.00833
																	range of separation	range of separation in um
		5	Plot of Kymograph-5	94.7229	252.661	24.3682	0	255	45.975	1055.16	0	23932.7	255	55080	0	255	32.55	4.8174
																	separation time	separation time (min)
		9	C1-20211130_Ubch10c114s40mgml_needle68_55_cytATL_TEV_e1_kym5_1to10scale,tif	71	992.91	185.634	705.65	1246.3	77	35	90	70496.6	972.65	70496.6	-3.403e+38	3.4e+38	70	3.5
																		2.05834
																		2.125
																		2.84166
																		2.925
																		3.5

## Sheet: Sheet5
		C1-20211208_ERYFP_629_Ubch10c114s40mgml_cytATL60mgml_TEV_e1
					pixel			velocity					velocity	average
		nucleus1	um	distance	width	17	2.516	5.85542		width	8.2083	1.21483	2.57447	4.21494
			sec	time	height	17.1875	0.859375			height	18.875	0.94375					pixels
																	range of separation	range of separation in um
		6	Plot of Kymograph-1	103.222	247.35	43.6089	0	255	37.9858	1419.17	0	25532	255	49470	0	255	26.2017	3.87785
																	separation time	separation time (min)
		1	C1-20211208_ERYFP_629_Ubch10c114s40mgml_cytATL60mgml_TEV_e1_kym1_1to10scale,tif	37	652.126	100.781	501.776	797.563	46.1667	18.0833	90	24128.6	636.694	24128.6	-3.403e+38	3.4e+38	36.1667	1.80834
					pixel			velocity					velocity	average
		nucleus2	um	distance	width	14.3125	2.11825	2.28229		width	14.6875	2.17375	3.32759	2.80494
			sec	time	height	18.5625	0.928125			height	13.065	0.65325
																	range of separation	range of separation in um
		6	Plot of Kymograph-2	63.2805	246.13	46.8252	0	255	48.9008	641.489	0	15575.3	255	56610	0	255	38.5483	5.70515
																	separation time	separation time (min)
		1	C1-20211208_ERYFP_629_Ubch10c114s40mgml_cytATL60mgml_TEV_e1_kym2_1to10scale,tif	36	1157.67	76.4457	957.167	1291.42	63.5	17.5	90	41676.1	1153.47	41676.1	-3.403e+38	3.4e+38	35	1.75
		nucleus3
					pixel			velocity					velocity	average
			um	distance	width	8.1667	1.20867	1.37456		width	13.0625	1.93325	1.76754	1.57105
			sec	time	height	17.5863	0.879315			height	21.875	1.09375
																	range of separation	range of separation in um
		5	Plot of Kymograph-3	90.1594	246.307	46.405	0	255	51.3292	1152.03	0	22206.9	255	43350	0	255	28.2917	4.18717
																	separation time	separation time (min)
		2	C1-20211208_ERYFP_629_Ubch10c114s40mgml_cytATL60mgml_TEV_e1_kym3_1to10scale,tif	51	905.935	282.712	385.692	1298.92	74	25	90	46202.7	972.894	46202.7	-3.403e+38	3.4e+38	50	2.5
					pixel			velocity					velocity	average
		nucleus4	um	distance	width	14.5	2.146	1.98474		width	9.75	1.443	1.61455	1.79964
			sec	time	height	21.625	1.08125			height	17.875	0.89375
																	range of separation	range of separation in um
		6	Plot of Kymograph-4	87.4143	0	0	0	0	39.91	1208.14	0	0	0	0	0	255	26.52	3.92496
																	separation time	separation time (min)
		4	C1-20211208_ERYFP_629_Ubch10c114s40mgml_cytATL60mgml_TEV_e1_kym4_1to10scale,tif	41	1193.14	120.32	1011.21	1374.03	85.8333	20.0833	90	48918.8	1201.54	48918.8	-3.403e+38	3.4e+38	40.1667	2.00834
		nucleus5			pixel			velocity					velocity	average
			um	distance	width	14.875	2.2015	1.85366		width	10.5417	1.56017	1.33731	1.59548
			sec	time	height	23.753	1.18765			height	23.333	1.16665
																	range of separation	range of separation in um
		13	Plot of Kymograph-5	82.7312	0	0	0	0	58.8933	944.934	0	0	0	0	0	255	32.2933	4.77941
																	separation time	separation time (min)
		5	C1-20211208_ERYFP_629_Ubch10c114s40mgml_cytATL60mgml_TEV_e1_kym5_1to10scale,tif	53	927.899	273.683	539.352	1414.25	78.1667	25.75	90	49178.6	974.573	49178.6	-3.403e+38	3.4e+38	51.5	2.575
																		1.80834
																		1.75
																		2.5
																		2.00833
																		2.575

## Sheet: Sheet6
		C1-20211219_afterUbch10C114S_buffer_TEV_e2
					pixel			velocity					velocity	average
		nucleus1	um	distance	width	22.833	3.37928	3.90856		width	20.125	2.9785	3.18769	3.54813
			sec	time	height	17.2917	0.864585			height	18.6875	0.934375					pixels
																	range of separation	range of separation in um
		5	Plot of Kymograph-1	183.376	0	0	0	0	62.15	1353.25	0	0	0	0	0	255	48.18	7.13064
																	separation time	separation time (min)
		14	C1-20211219_afterUbch10C114S_buffer_TEV_e2_kym1_1to10scale,tif	34	1712.57	276.428	1185.35	2094	75	16.5	90	58227.3	1738.2	58227.3	-3.403e+38	3.4e+38	33	1.65
					pixel			velocity					velocity	average
		nucleus2	um	distance	width	17.8125	2.63625	3.54454		width	20.25	2.997	2.62033	3.08243
			sec	time	height	14.875	0.74375			height	22.875	1.14375
																	range of separation	range of separation in um
		12	Plot of Kymograph-2	148.959	0	0	0	0	59.7958	1067.25	0	0	0	0	0	255	51.435	7.61238
																	separation time	separation time (min)
		13	C1-20211219_afterUbch10C114S_buffer_TEV_e2_kym2_1to10scale,tif	33	1528.45	169.437	1220.4	1774.72	74.5	16	90	50439	1546.8	50439	-3.403e+38	3.4e+38	32	1.6
					pixel			velocity					velocity	average
		nucleus3	um	distance	width	16.8125	2.48825	3.54937		width	22	3.256	3.56822	3.55879
			sec	time	height	14.0208	0.70104			height	18.25	0.9125
																	range of separation	range of separation in um
		6	Plot of Kymograph-3	207.993	0	0	0	0	48.72	1509.69	0	0	0	0	0	255	48.9067	7.23819
																	separation time	separation time (min)
		12	C1-20211219_afterUbch10C114S_buffer_TEV_e2_kym3_1to10scale,tif	34	1428.72	383.117	827.85	1856	60	16.5	90	48576.4	1504.6	48576.4	-3.403e+38	3.4e+38	33	1.65
		nucleus4			pixel			velocity					velocity	average
			um	distance	width	24.8125	3.67225	4.13775		width	16	2.368	2.12258	3.13016
			sec	time	height	17.75	0.8875			height	22.3125	1.11563
																	range of separation	range of separation in um
		12	Plot of Kymograph-4	221.474	245.794	47.6542	0	255	58.8	1514.32	0	54437.1	255	68085	0	255	51.52	7.62496
																	separation time	separation time (min)
		11	C1-20211219_afterUbch10C114S_buffer_TEV_e2_kym4_1to10scale,tif	34	1975.33	165.036	1643	2129.67	57	16.25	90	67161.1	2047.2	67161.1	-3.403e+38	3.4e+38	32.5	1.625
		nucleus5			pixel			velocity					velocity	average
			um	distance	width	25.333	3.74928	3.38281		width	17.3333	2.56533	1.91205	2.64743
			sec	time	height	22.1667	1.10834			height	26.8333	1.34167
																	range of separation	range of separation in um
		7	Plot of Kymograph-5	152.289	255	0	255	255	66.0267	990.982	0	38833.7	255	68340	0	255	56.96	8.43008
																	separation time	separation time (min)
		10	C1-20211219_afterUbch10C114S_buffer_TEV_e2_kym5_1to10scale,tif	32	1856.58	116.799	1644.2	2093.75	73	15.5	90	59410.6	1793	59410.6	-3.403e+38	3.4e+38	31	1.55
																		1.65
																		1.6
																		1.65
																		1.625
																		1.55

## Sheet: Sheet7
		C1-20211202_Ubch10c114s40mgml_buffer_TEV_e7
								um/min
						pixel		velocity			pixel		velocity	average
		nucleus1	um	distance	width	18.25	2.701	3.01506		width	21.1667	3.13267	3.70364	3.35935
			sec	time	height	17.9167	0.895835			height	16.9167	0.845835					pixels
																	range of separation	range of separation in um
		6	Plot of Kymograph-1	114.225	255	0	255	255	44.5717	872.714	0	29127.3	255	80070	0	255	49.0367	7.25743
																	separation time	separation time (min)
		1	C1-20211202_Ubch10c114s40mgml_buffer_TEV_e7_kym1_1to10scale,tif	18	1287.86	72.6837	1110.8	1354.5	49.1667	8.25	90	23181.4	1309.36	23181.4	-3.403e+38	3.4e+38	16.5	0.825
						pixel		velocity					velocity	average
		nucleus2	um	distance	width	18.4167	2.72567	2.79556		width	23.1667	3.42867	3.53167	3.16362
			sec	time	height	19.5	0.975			height	19.4167	0.970835					pixels
																	range of separation	range of separation in um
		5	Plot of Kymograph-2	200.825	0	0	0	0	53.7625	1539.27	0	0	0	0	0	255	46.1917	6.83637
																	separation time	separation time (min)
		2	C1-20211202_Ubch10c114s40mgml_buffer_TEV_e7_kym2_1to10scale,tif	25	1771.5	95.2311	1610	1859.6	61	12	90	44287.6	1812.9	44287.6	-3.403e+38	3.4e+38	24	1.2
						pixel		velocity					velocity	average
		nucleus3	um	distance	width	16.6667	2.46667	3.16579		width	24.6667	3.65067	4.92226	4.04403
			sec	time	height	15.5833	0.779165			height	14.8333	0.741665					pixels
																	range of separation	range of separation in um
		11	Plot of Kymograph-3	116.222	245.981	47.1776	0	255	46.1783	824.398	0	28588.4	255	76500	0	255	53.2167	7.87607
																	separation time	separation time (min)
		3	C1-20211202_Ubch10c114s40mgml_buffer_TEV_e7_kym3_1to10scale,tif	24	1505.86	193.153	1045.6	1740.25	62.5	11.5833	90	36140.7	1539.51	36140.7	-3.403e+38	3.4e+38	23.1667	1.15833
		nucleus4				pixel		velocity					velocity	average
			um	distance	width	18.25	2.701	3.42984		width	23.25	3.441	3.8101	3.61997
			sec	time	height	15.75	0.7875			height	18.0625	0.903125					pixels
																	range of separation	range of separation in um
		17	Plot of Kymograph-4	185.222	255	0	255	255	50.5942	1281.65	0	47231.7	255	73440	0	255	52.1383	7.71647
																	separation time	separation time (min)
		4	C1-20211202_Ubch10c114s40mgml_buffer_TEV_e7_kym4_1to10scale,tif	27	1783.36	70.8581	1544.3	1846.65	56.5	12.75	90	48150.6	1799.97	48150.6	-3.403e+38	3.4e+38	25.5	1.275
						pixel		velocity					velocity	average
		nucleus5	um	distance	width	16.15	2.3902	1.92177	distance	width	25	3.7	2.34921	2.13549
			sec	time	height	24.875	1.24375		time	height	31.5	1.575					pixels
																	range of separation	range of separation in um
		23	Plot of Kymograph-5	113.113	0	0	0	0	63.375	969.325	0	0	0	0	0	255	43.1167	6.38127
																	separation time	separation time (min)
		5	C1-20211202_Ubch10c114s40mgml_buffer_TEV_e7_kym5_1to10scale,tif	25	1198.56	111.445	1090.5	1388	71	12	90	29964	1128.65	29964	-3.403e+38	3.4e+38	24	1.2
																		0.825
																		1.2
																		1.15833
																		1.275
																		1.2

## Sheet: Sheet8
		C1-20211202_Ubch10c114s40mgml_buffer_TEV_e11
						in pixels		velocity			in pixels		velocity	average
		nucleus1	um	distance	width	20.875	3.0895	2.13069		width	16.5	2.442	2.12348	2.12708
			sec	time	height	29	1.45			height	23	1.15					pixels
																	range of separation	range of separation in um
		5	Plot of Kymograph-1	73.9427	255	0	255	255	61.9792	621.449	0	18855.4	255	57120	0	255	46.4583	6.87583
																	separation time	separation time (min)
		6	C1-20211202_Ubch10c114s40mgml_buffer_TEV_e11_kym1_1to10scale,tif	24	505.076	29.4384	446.025	548.207	76	11.25	90	12121.8	505.489	12121.8	-3.403e+38	3.4e+38	22.5	1.125
		nucleus2				in pixels		velocity			in pixels		velocity	average
			um	distance	width	23.125	3.4225	3.99708		width	17.75	2.627	3.78667	3.89187
			sec	time	height	17.125	0.85625			height	13.875	0.69375					pixels
																	range of separation	range of separation in um
		11	Plot of Kymograph-2	95.6333	255	0	255	255	53.8833	823.33	0	24386.5	255	60945	0	255	42.0467	6.22291
																	separation time	separation time (min)
		1	C1-20211202_Ubch10c114s40mgml_buffer_TEV_e11_kym2_1to10scale.tif	27	1062.2370	110.0154	961.1000	1277.3000	63	13	90	28680.4001	982	28680.4001	-3.403E38	3.4e38	26	1.3
		nucleus3				in pixels		velocity			in pixels		velocity	average
			um	distance	width	18.25	2.701	2.0911		width	17.25	2.553	1.64268	1.86689
			sec	time	height	25.8333	1.29167			height	31.0833	1.55417					pixels
																	range of separation	range of separation in um
		18	Plot of Kymograph-3	128.796	246.34	46.2761	0	255	46.55	1070.46	0	31727.5	255	65280	0	255	43.12	6.38176
																	separation time	separation time (min)
		2	C1-20211202_Ubch10c114s40mgml_buffer_TEV_e11_kym3_1to10scale.tif	26	1270.3279	114.6587	1007.6250	1388.5000	58.5000	12.5000	90	33028.5250	1316.5625	33028.5250	-3.403E38	3.4e38	25	1.25
		nucleus4				in pixels		velocity			in pixels		velocity	average
			um	distance	width	16.5	2.442	2.06363		width	22.5833	3.34233	2.76606	2.41485
			sec	time	height	23.667	1.18335			height	24.1667	1.20833					pixels
																	range of separation	range of separation in um
		5	Plot of Kymograph-4	94.6055	255	0	255	255	59.0883	717.042	0	24124.4	255	64005	0	255	50.4167	7.46167
																	separation time	separation time (min)
		3	C1-20211202_Ubch10c114s40mgml_buffer_TEV_e11_kym4_1to10scale.tif	27	936.3852	56.2775	838.4000	1021.9000	76.0000	13.0000	90	25282.4000	941.1000	25282.4000	-3.403E38	3.4e38	26	1.3
		nucleus5			pixel			velocity					velocity	average
			um	distance	width	19.375	2.8675	2.01228	distance	width	19.125	2.8305	2.664	2.33814
			sec	time	height	28.5	1.425		time	height	21.25	1.0625
																	range of separation	range of separation in um
		11	Plot of Kymograph-5	116.246	247.202	43.9731	0	255	48.3383	817.889	0	28736.1	255	80835	0	255	52.7033	7.80009
																	separation time	separation time (min)
		4	C1-20211202_Ubch10c114s40mgml_buffer_TEV_e11_kym5_1to10scale.tif	28	807.9464	122.3374	610.0000	979.6500	54.0000	13.5000	90	22622.5000	833.9000	22622.5000	-3.403E38	3.4e38	27	1.35
																		1.125
																		1.3
																		1.25
																		1.3
																		1.35

## Sheet: Sheet9
		C1-20211219_afterUbch10C114S_cytATL_TEV_e1
					pixel			velocity					velocity	average
		nucleus1	um	distance	width	13.0833	1.93633	2.34706		width	18.667	2.76272	3.06968	2.70837
			sec	time	height	16.5	0.825			height	18	0.9					pixels
																	range of separation	range of separation in um
		17	Plot of Kymograph-1	191.818	255	0	255	255	39.27	1847.63	0	48913.7	255	68340	0	255	37.38	5.53224
																	separation time	separation time (min)
		1	C1-20211219_afterUbch10C114S_cytATL_TEV_e1_kym1_1to10scale,tif	18	1882.29	142.997	1660.6	2065	55.5	8.25	90	33881.2	1885.6	33881.2	-3.403e+38	3.4e+38	16.5	0.825
						pixel		velocity					velocity	average
		nucleus2	um	distance	width	14	2.072	3.82524		width	20.667	3.05872	3.35202	3.58863
			sec	time	height	10.8333	0.541665			height	18.25	0.9125
																	range of separation	range of separation in um
		23	Plot of Kymograph-2	156.735	0	0	0	0	42.6067	1594.72	0	0	0	0	0	255	34.86	5.15928
																	separation time	separation time (min)
		2	C1-20211219_afterUbch10C114S_cytATL_TEV_e1_kym2_1to10scale,tif	20	1724.85	119.096	1600.33	1902.5	73.8333	9.4167	90	34497	1691.08	34497	-3.403e+38	3.4e+38	18.8333	0.941665
						pixel		velocity					velocity	average
		nucleus3	um	distance	width	17.875	2.6455	1.71368		width	17.15	2.5382	2.92167	2.31768
			sec	time	height	30.875	1.54375			height	17.375	0.86875
																	range of separation	range of separation in um
		31	Plot of Kymograph-3	141.363	246.5	45.8833	0	255	45.2725	1554.64	0	34845.9	255	51765	0	255	31.6983	4.69135
																	separation time	separation time (min)
		3	C1-20211219_afterUbch10C114S_cytATL_TEV_e1_kym3_1to10scale,tif	21	1865.91	138.768	1534.6	1970.5	71.5	9.75	90	39184.1	1937.15	39184.1	-3.403e+38	3.4e+38	19.5	0.975
						pixel		velocity					velocity	average
		nucleus4	um	distance	width	17.875	2.6455	2.50462		width	17.375	2.5715	3.09346	2.79904
			sec	time	height	21.125	1.05625			height	16.6254	0.83127
																	range of separation	range of separation in um
		38	Plot of Kymograph-4	114.825	255	0	255	255	51.895	1120.23	0	29280.5	255	53805	0	255	37.45	5.5426
																	separation time	separation time (min)
		4	C1-20211219_afterUbch10C114S_cytATL_TEV_e1_kym4_1to10scale,tif	16	1701.97	151.372	1412.6	1876.83	59.8333	7.25	90	27231.4	1718.26	27231.4	-3.403e+38	3.4e+38	14.5	0.725
						pixel		velocity					velocity	average
		nucleus5	um	distance	width	16.25	2.405	2.0913		width	11	1.628	1.55048	1.82089
			sec	time	height	23	1.15			height	21	1.05
																	range of separation	range of separation in um
		44	Plot of Kymograph-5	158.709	0	0	0	0	41.37	1791.08	0	0	0	0	0	255	31.22	4.62056
																	separation time	separation time (min)
		5	C1-20211219_afterUbch10C114S_cytATL_TEV_e1_kym5_1to10scale,tif	20	1547.57	67.7162	1454.15	1650	70.5	9.5	90	30951.3	1536.73	30951.3	-3.403e+38	3.4e+38	19	0.95
																		0.825
																		0.941665
																		0.975
																		0.725
																		0.95

## Sheet: Sheet10
		20220202_cytATL_TEV_e4																		3.43056		0.875
													velocity (um/sec)							3.38601		0.775
	nucleus1	height	13.5	1.35		height	10.875	1.0875		time (min)	0.609375		3.43056							2.33306		0.90835
		width	20.75			width	7.5			distance (um)	2.0905
																					time of separation
		5	MAX_C2-20220302_UbcH10C114S_cytATL_TEV_e4_thumb_w1BP CSU-488 Em 500-550_t1-3.TIF (Projected Kymograph)-1:0009-0067	19	2616.53	289.868	2063	2958	17.5	90	0.78	49714	2656	49714	1	0	0	NaN	0	65535	17.5	0.875
																					distance of separation
		1	Plot of MAX_C2-20220302_UbcH10C114S_cytATL_TEV_e4_thumb_w1BP CSU-488 Em 500-550_t1-3.TIF (Projected Kymograph)-1	170.19	246.905	44.826	0	255	27.887	0	1	42020.8	255	46665	1	0	0	NaN	0	255	27.887	4.12728
																					4.12728
																					5.81196
													velocity (um/sec)								6.18388
	nucleus2	height	10.375	1.0375		height	15.25	1.525		time (min)	0.640625		3.38601
		width	12.125			width	17.188			distance (um)	2.16916
																					time of separation
		1	MAX_C2-20220302_UbcH10C114S_cytATL_TEV_e4_thumb_w1BP CSU-488 Em 500-550_t1-1.TIF (Projected Kymograph)-1:0008-0062	17	2503.47	85.871	2255	2604	15.5	90	0.889	42559	2510	42559	1	0	0	NaN	0	65535	15.5	0.775
																					distance of separation
		2	Plot of MAX_C2-20220302_UbcH10C114S_cytATL_TEV_e4_thumb_w1BP CSU-488 Em 500-550_t1-1.TIF (Projected Kymograph)-1	235.699	246.207	46.629	0	255	39.27	0	1	58030.7	255	57120	1	0	0	NaN	0	255	39.27	5.81196
													velocity (um/sec)
	nucleus3	height	15.375	1.5375		height	20.625	2.0625		time (min)	0.9		2.33306
		width	10.125			width	18.25			distance (um)	2.09975
																					time of separation
		1	MAX_C2-20220302_UbcH10C114S_cytATL_TEV_e4_thumb_w1BP CSU-488 Em 500-550_t1-2.TIF (Projected Kymograph)-1:0009-0066	19	2245.58	101.25	1989	2313	18.167	90	0.723	42666	2296	42666	1	0	0	NaN	0	65535	18.167	0.90835
																					distance of separation
		1	Plot of MAX_C2-20220302_UbcH10C114S_cytATL_TEV_e4_thumb_w1BP CSU-488 Em 500-550_t1-2.TIF (Projected Kymograph)-1	227.005	245.065	49.45	0	255	41.783	0	1	55631	255	56610	1	0	0	NaN	0	255	41.783	6.18388

[truncated: 1 more sheets: Sheet11]
