# Supplementary material for: Endoplasmic reticulum membranes are continuously required to maintain mitotic spindle size and forces
Source: Life Sci Alliance. 2022 Nov 15;6(1):e202201540. doi: 10.26508/lsa.202201540 (PMC9671068; doi:10.26508/lsa.202201540)
Supplement: Supplementary file 19 [file LSA-2022-01540_SdataF5.2.xlsx]

## Sheet: Sheet1
			C1-20220209_UbcH10C114A30mgml_cytATL_UbcH10wt_e5-2,tif (Projected Kymograph)-1,tif
				pixels						pixels				average				velocity (um/sec)
			height	35.27	3.527				height	52.16	5.216			4.3715		time (sec)	2.18575	1.30344
			width	16.88					width	21.62				19.25		distance (micron)	2.849
																			length	onset of separation
			1	C1-20220209_UbcH10C114A30mgml_cytATL_UbcH10wt_e5-2,tif (Projected Kymograph)-1,tif	99.0667	1061.27	14.9338	1038	1086	81	48.4076	96.8152	90	105137	1061	35022	0	65535	96.8152	4.84076
			C1-20220209_UbcH10C114A30mgml_cytATL_UbcH10wt_e5-2,tif (Projected Kymograph)-2,tif
				pixels				pixels			average				velocity (um/sec)
			height	68.3	6.83		height	46.91	4.691		5.7605		time (sec)	2.88025	1.002
			width	18.5			width	20.5			19.5		distance (micron)	2.886
																			length	onset of separation
			9	C1-20220209_UbcH10C114A30mgml_cytATL_UbcH10wt_e5-2,tif (Projected Kymograph)-2,tif	37	1549.27	60.6766	1414	1668	73.25	17.875	35.75	90	57323	1529	57323	0	65535	35.75	1.7875
			8	Plot of C1-20220209_UbcH10C114A30mgml_cytATL_UbcH10wt_e5-2,tif (Projected Kymograph)-2	104.43	255	0	255	255	54.4333	1040.38	47.5333	0	26629.7	255	63495	0	255	47.5333	7.03493
			C1-20220209_UbcH10C114A30mgml_cytATL_UbcH10wt_e5-2,tif (Projected Kymograph)-3,tif
											average				velocity (um/sec)
			height	15.4375	1.54375		height	21.685	2.1685		1.85613		time (sec)	0.928063	3.27137
			width	17.215			width	23.8125			20.5138		distance (micron)	3.03604
																				onset of separation
			1	C1-20220209_UbcH10C114A30mgml_cytATL_UbcH10wt_e5-2,tif (Projected Kymograph)-1,tif	33	1109.33	17.6364	1086	1142	80.5	16.125	32.25	90	36608	1109	36608	0	65535	32.25	1.6125
																				range of separatiom
			2	Plot of C1-20220209_UbcH10C114A30mgml_cytATL_UbcH10wt_e5-2,tif (Projected Kymograph)-1	67.0942	244.538	50.7093	0	255	65.625	911.375	40.4167	0	16407.1	255	47685	0	255	40.4167	5.98167
			C1-20220209_UbcH10C114A30mgml_cytATL_UbcH10wt_e5-2,tif (Projected Kymograph)-2,tif								average				velocity (um/sec)
			height	24.1667	2.41667		height	17.1667	1.71667		2.06667		time (sec)	1.03333	3.07935
			width	19.3333			width	23.6667			21.5		distance (micron)	3.182
																				onset of separation
			7	C1-20220209_UbcH10C114A30mgml_cytATL_UbcH10wt_e5-2,tif (Projected Kymograph)-2,tif	37	1549.27	60.6766	1414	1668	73.25	17.875	35.75	90	57323	1529	57323	0	65535	35.75	1.7875
																				range of separatiom
			8	Plot of C1-20220209_UbcH10C114A30mgml_cytATL_UbcH10wt_e5-2,tif (Projected Kymograph)-2	104.912	245.341	48.7727	0	255	53.5008	1037.37	47.7783	0	25739.1	255	64770	0	255	47.7783	7.07119
											average				velocity (um/sec)
			height	15.0833	1.50833		height	11.5	1.15		1.32916		time (sec)	0.664582	3.82295
			width	15.25			width	19.0833			17.1667		distance (micron)	2.54066
																				onset of separation
			7	C1-20220209_UbcH10C114A30mgml_cytATL_UbcH10wt_e5-2,tif (Projected Kymograph)-3,tif	35	1369.34	91.0103	1169	1467	79.1667	16.75	33.5	90	47927	1401	47927	0	65535	33.5	1.675
																				range of separatiom
			6	Plot of C1-20220209_UbcH10C114A30mgml_cytATL_UbcH10wt_e5-2,tif (Projected Kymograph)-3	78.8149	243.484	53.1244	0	255	73.555	1053.39	36.19	0	19190.1	255	37740	0	255	36.19	5.35612
											average				velocity (um/sec)
			height	33.5	3.35		height	27.75	2.775		3.0625		time (sec)	1.53125	3.67282
			width	43.625			width	32.375			38		distance (micron)	5.624
																				onset of separation
			8	C1-20220209_UbcH10C114A40mgml_buffer_UbcH10wt_e8-1,tif (Projected Kymograph)-3,tif	68	1099.03	80.7901	988	1239	76.5	33.25	66.5	90	74734	1090	74734	0	65535	66.5	3.325
																				range of separatiom
			13	Plot of C1-20220209_UbcH10C114A40mgml_buffer_UbcH10wt_e8-1,tif (Projected Kymograph)-3	81.072	248.325	40.7678	0	255	73.375	646.012	95.25	0	20132.2	255	94860	0	255	95.25	14.097
											average				velocity (um/sec)
			height	31.75	3.175		height	24.7083	2.47083		2.82292		time (sec)	1.41146	5.17727
			width	61.75			width	37			49.375		distance (micron)	7.3075
																				onset of separation
			1	C1-20220209_UbcH10C114A40mgml_buffer_UbcH10wt_e8-2,tif (Projected Kymograph)-2,tif	70	1204.8	64.4883	1055	1290	92	34.5	69	90	84336	1197	84336	0	65535	69	3.45
																				range of separatiom
			3	Plot of C1-20220209_UbcH10C114A40mgml_buffer_UbcH10wt_e8-2,tif (Projected Kymograph)-2	104.762	248.688	39.6684	0	255	73.7917	698.982	103.437	0	26053.1	255	100470	0	255	103.437	15.3086
											average				velocity (um/sec)
			height	24.75	2.475		height	36	3.6		3.0375		time (sec)	1.51875	4.34458
			width	41			width	48.1667			44.5834		distance (micron)	6.59834
																				onset of separation
			1	C1-20220209_UbcH10C114A40mgml_buffer_UbcH10wt_e8-3,tif (Projected Kymograph)-1,tif	74	959.04	71.6943	755	1087	77.8333	36.4167	72.8333	90	70969	941	70969	0	65535	72.8333	3.64167
																				range of separatiom
			1	Plot of C1-20220209_UbcH10C114A40mgml_buffer_UbcH10wt_e8-3,tif (Projected Kymograph)-1	105.823	248.552	40.0802	0	255	70.215	674.309	109.223	0	26302.6	255	108120	0	255	109.223	16.165
											average				velocity (um/sec)
			height	40.5	4.05		height	26.3333	2.63333		3.34166		time (sec)	1.67083	4.54704
			width	51			width	51.6667			51.3334		distance (micron)	7.59734
																				onset of separation
			2	C1-20220210_UbcH10C114S40mgml_buffer_UbcH10wt_e4-2,tif (Projected Kymograph)-1,tif	78.0659	1412.69	194.844	1049	1633	77.8333	38.0321	75.0634	90	110283	1493	36730	0	65535	75.0634	3.75317
			10	Plot of C1-20220210_UbcH10C114S40mgml_buffer_UbcH10wt_e4-2,tif (Projected Kymograph)-1	138.809	248.29	40.8634	0	255	74.9183	761.151	119.817	0	34464.9	255	113220	0	255	119.817	17.7329
											average				velocity (um/sec)
			height	50.333	5.0333		height	32.6667	3.26667		4.14999		time (sec)	2.07499	4.30925
			width	66.8333			width	54			60.4167		distance (micron)	8.94167
																				onset of separation
			12	C1-20220210_UbcH10C114S40mgml_buffer_UbcH10wt_e4-2,tif (Projected Kymograph)-2,tif	25	1378.04	68.4924	1250	1489	79.5	12	24	90	34451	1343	34451	0	65535	24	1.2
																				range of separatiom
			11	Plot of C1-20220210_UbcH10C114S40mgml_buffer_UbcH10wt_e4-2,tif (Projected Kymograph)-2	326.791	254.013	15.8449	0	255	80.03	801.444	136.74	0	83009.4	255	131325	0	255	136.74	20.2375
											average				velocity (um/sec)
			height	27.5	2.75		height	22.5	2.25		2.5		time (sec)	1.25	5.4538
			width	36.375			width	55.75			46.0625		distance (micron)	6.81725
																				onset of separation
			17	C1-20220210_UbcH10C114S40mgml_buffer_UbcH10wt_e4-2,tif (Projected Kymograph)-3,tif	23	1385.48	89.7496	1171	1494	77.25	11	22	90	31866	1405	31866	0	65535	22	1.1
																				range of separatiom
			18	Plot of C1-20220210_UbcH10C114S40mgml_buffer_UbcH10wt_e4-2,tif (Projected Kymograph)-3	291.16	248.808	39.2943	0	255	89.18	833.085	117.52	0	72442.8	255	112710	0	255	117.52	17.393
											average				velocity (um/sec)
			height	34.25	3.425		height	26	2.6		3.0125		time (sec)	1.50625	3.94257
			width	38.5			width	41.75			40.125		distance (micron)	5.9385
																				onset of separation
			23	C1-20220210_UbcH10C114S40mgml_buffer_UbcH10wt_e7-2,tif (Projected Kymograph)-1,tif	32	750.406	33.8172	707	809	81.8333	15.25	30.5	90	24013	741	24013	0	65535	30.5	1.525
																				range of separatiom
			24	Plot of C1-20220210_UbcH10C114S40mgml_buffer_UbcH10wt_e7-2,tif (Projected Kymograph)-1	90.3334	253.78	17.6176	0	255	73.8792	715.458	103.555	0	22924.8	255	106080	0	255	103.555	15.3261
											average				velocity (um/sec)
			height	41.5	4.15		height	20.5	2.05		3.1		time (sec)	1.55	4.40818
			width	52.6667			width	39.6667			46.1667		distance (micron)	6.83267
																				onset of separation
			32	C1-20220210_UbcH10C114S40mgml_buffer_UbcH10wt_e7-2,tif (Projected Kymograph)-2,tif	25	1243.68	90.2371	1075	1383	87.8333	11.9167	23.8333	90	31092	1215	31092	0	65535	23.8333	1.19166
																				range of separatiom
			31	Plot of C1-20220210_UbcH10C114S40mgml_buffer_UbcH10wt_e7-2,tif (Projected Kymograph)-2	129.15	251.582	29.3645	0	255	66.395	860.972	91.151	-0.8884	32491.7	255	93840	0	255	91.151	13.4903
											average				velocity (um/sec)
			height	23.625	2.3625		height	22.625	2.2625		2.3125		time (sec)	1.15625	4.808
			width	34			width	41.125			37.5625		distance (micron)	5.55925
																				onset of separation
			38	C1-20220210_UbcH10C114S40mgml_buffer_UbcH10wt_e7-3,tif (Projected Kymograph)-2,tif	25	1104.76	70.1975	968	1206	79.5	11.75	23.5	90	27619	1096	27619	0	65535	23.5	1.175
																				range of separatiom
			37	Plot of C1-20220210_UbcH10C114S40mgml_buffer_UbcH10wt_e7-3,tif (Projected Kymograph)-2	111.031	252.723	24.0232	0	255	71.3958	845.435	83.1917	0	28060.1	255	84915	0	255	83.1917	12.3124
											average				velocity (um/sec)
			height	19.75	1.975		height	19.625	1.9625		1.96875		time (sec)	0.984375	6.10794
			width	45.375			width	35.875			40.625		distance (micron)	6.0125
																				onset of separation
			44	C1-20220210_UbcH10C114S40mgml_cytATL_UbcH10wt_e2-1,tif (Projected Kymograph)-1,tif	29	1181.97	110.285	949	1328	78.5	13.9167	27.8333	90	34277	1189	34277	0	65535	27.8333	1.39166
																				range of separatiom
			43	Plot of C1-20220210_UbcH10C114S40mgml_cytATL_UbcH10wt_e2-1,tif (Projected Kymograph)-1	117.21	252.337	25.9573	0	255	67.44	843.383	91.68	0	29576.4	255	96645	0	255	91.68	13.5686
											average				velocity (um/sec)
			height	25.375	2.5375		height	23.375	2.3375		2.4375		time (sec)	1.21875	5.16862
			width	46.625			width	38.5			42.5625		distance (micron)	6.29925
																				onset of separation
			50	C1-20220210_UbcH10C114S40mgml_cytATL_UbcH10wt_e2-1,tif (Projected Kymograph)-2,tif	29	1206.31	125.934	940	1340	79.5	13.75	27.5	90	34983	1250	34983	0	65535	27.5	1.375
																				range of separatiom
			49	Plot of C1-20220210_UbcH10C114S40mgml_cytATL_UbcH10wt_e2-1,tif (Projected Kymograph)-2	127.665	249.155	38.2173	0	255	75.75	935.587	87.0123	0.9635	31808.3	255	86955	0	255	87.0123	12.8778
											average				velocity (um/sec)
			height	20	2		height	17.375	1.7375		1.86875		time (sec)	0.934375	5.65931
			width	36.8333			width	34.625			35.7291		distance (micron)	5.28791
																				onset of separation
			56	C1-20220210_UbcH10C114S40mgml_cytATL_UbcH10wt_e2-1,tif (Projected Kymograph)-3,tif	33	1414.12	168.782	987	1602	82.5	16	32	90	46666	1455	46666	0	65535	32	1.6
																				range of separatiom
			55	Plot of C1-20220210_UbcH10C114S40mgml_cytATL_UbcH10wt_e2-1,tif (Projected Kymograph)-3	167.901	243.22	53.5996	0	255	66.125	1076.36	84.41	0	40837	255	89505	0	255	84.41	12.4927
											average				velocity (um/sec)
			height	15.0833	1.50833		height	34.333	3.4333		2.47081		time (sec)	1.23541	5.90507
			width	24.4167			width	74.1667			49.2917		distance (micron)	7.29517
																				onset of separation
			1	C1-20220210_UbcH10C114S40mgml_cytATL_UbcH10wt_e6-1,tif (Projected Kymograph)-2,tif	62	1923.69	150.248	1612	2199	101.5	30.4167	60.8333	90	119269	1904	119269	0	65535	60.8333	3.04167
																				range of separatiom
			2	Plot of C1-20220210_UbcH10C114S40mgml_cytATL_UbcH10wt_e6-1,tif (Projected Kymograph)-2	233.092	248.577	40.0086	0	255	66.8867	1151.41	104.28	0	57941.2	255	98685	0	255	104.28	15.4334
											average				velocity (um/sec)
			height	20.375	2.0375		height	28.625	2.8625		2.45		time (sec)	1.225	5.14224
			width	27.75			width	57.375			42.5625		distance (micron)	6.29925
																				onset of separation
			9	C1-20220211_UbcH10C114S40mgml_buffer_UbcH10wt_e5-1,tif (Projected Kymograph)-1,tif	38	1396.87	115.524	1209	1570	73.1667	18.4167	36.8333	90	53081	1392	53081	0	65535	36.8333	1.84167
																				range of separatiom
			8	Plot of C1-20220211_UbcH10C114S40mgml_buffer_UbcH10wt_e5-1,tif (Projected Kymograph)-1	176.764	242.857	54.3855	0	255	73.365	879.052	81.5167	0	42928.5	255	81600	0	255	81.5167	12.0645
											average				velocity (um/sec)
			height	16.8333	1.68333		height	18.6667	1.86667		1.775		time (sec)	0.8875	6.09371
			width	27.4167			width	45.6667			36.5417		distance (micron)	5.40817
																				onset of separation
			15	C1-20220211_UbcH10C114S40mgml_buffer_UbcH10wt_e5-1,tif (Projected Kymograph)-2,tif	52	1473.33	188.909	967	1683	68.8333	25.4167	50.8333	90	76613	1553	76613	0	65535	50.8333	2.54167
																				range of separatiom
			14	Plot of C1-20220211_UbcH10C114S40mgml_buffer_UbcH10wt_e5-1,tif (Projected Kymograph)-2	144.565	253.469	19.7323	0	255	71.2217	736.774	83.5533	0	36642.6	255	84405	0	255	83.5533	12.3659
											average				velocity (um/sec)
			height	15.75	1.575		height	18.625	1.8625		1.71875		time (sec)	0.859375	5.6466
			width	30.25			width	35.325			32.7875		distance (micron)	4.85255
																				onset of separation
			21	C1-20220211_UbcH10C114S40mgml_buffer_UbcH10wt_e5-1,tif (Projected Kymograph)-3,tif	55	1377.16	80.3176	1227	1527	74.8333	26.75	53.5	90	75744	1395	75744	0	65535	53.5	2.675
																				range of separatiom
			20	Plot of C1-20220211_UbcH10C114S40mgml_buffer_UbcH10wt_e5-1,tif (Projected Kymograph)-3	169.924	243.603	52.764	0	255	63.0642	882.788	79.135	0	41394	255	87210	0	255	79.135	11.712
											average				velocity (um/sec)
			height	12.3333	1.23333		height	21.75	2.175		1.70416		time (sec)	0.852082	5.1601
			width	19.3333			width	40.0833			29.7083		distance (micron)	4.39683
																				onset of separation
			28	C1-20220211_UbcH10C114S40mgml_cytATL_UbcH10wt_e2-1,tif (Projected Kymograph)-1,tif	52	1374.25	149.274	915	1560	69.5	25.25	50.5	90	71461	1379	71461	0	65535	50.5	2.525
																				range of separatiom
			27	Plot of C1-20220211_UbcH10C114S40mgml_cytATL_UbcH10wt_e2-1,tif (Projected Kymograph)-1	139.81	249.01	38.6856	0	255	69.2325	785.519	75.735	0	34814	255	74205	0	255	75.735	11.2088
											average				velocity (um/sec)
			height	26	2.6		height	24.3333	2.43333		2.51667		time (sec)	1.25833	5.25351
			width	58.8333			width	30.5			44.6666		distance (micron)	6.61066
																				onset of separation
			33	C1-20220211_UbcH10C114S40mgml_cytATL_UbcH10wt_e2-1,tif (Projected Kymograph)-2,tif	58	1721.16	121.626	1279	1846	88.5	28.25	56.5	90	99827	1766	99827	0	65535	56.5	2.825
																				range of separatiom
			34	Plot of C1-20220211_UbcH10C114S40mgml_cytATL_UbcH10wt_e2-1,tif (Projected Kymograph)-2	208.918	252.821	23.5073	0	255	103.867	942.886	88.6667	0	52818.8	255	88740	0	255	88.6667	13.1227
											average				velocity (um/sec)
			height	23.5	2.35		height	26.875	2.6875		2.51875		time (sec)	1.25937	3.77529
			width	41.125			width	23.125			32.125		distance (micron)	4.7545
																				onset of separation
			2	C1-20220211_UbcH10C114S40mgml_cytATL_UbcH10wt_e2-2,tif (Projected Kymograph)-1,tif	48	1266.65	50.5163	1174	1375	86.5	23.25	46.5	90	60799	1266	60799	0	65535	46.5	2.325
																				range of separatiom
			1	Plot of C1-20220211_UbcH10C114S40mgml_cytATL_UbcH10wt_e2-2,tif (Projected Kymograph)-1	143.35	192	0	192	192	72.3542	799.158	75.7517	0	27523.2	192	57984	0	255	75.7517	11.2113
											average				velocity (um/sec)
			height	27.6667	2.76667		height	26.5833	2.65833		2.7125		time (sec)	1.35625	4.95607
			width	63.5			width	27.3333			45.4166		distance (micron)	6.72166
																				onset of separation
			1	C1-20220211_UbcH10C114S40mgml_cytATL_UbcH10wt_e2-2,tif (Projected Kymograph)-2,tif	55	1724.56	111.253	1332	1841	103.167	27.0833	54.1667	90	94851	1740	94851	0	65535	54.1667	2.70833
																				range of separatiom
			2	Plot of C1-20220211_UbcH10C114S40mgml_cytATL_UbcH10wt_e2-2,tif (Projected Kymograph)-2	284.978	253.654	18.4995	0	255	82.925	977.982	97.65	0	72285.9	255	96135	0	255	97.65	14.4522

## Sheet: 20220218
									average					velocity (um/sec)
	height	33.667	3.3667		height	33	3.3		3.33335		time (sec)	1.66667		4.29195
	width	31.333			width	65.333			48.333		distance (um)	7.15328
															range of separatiom
	1	Plot of C1-20220218_UbcH10C114S_buffer_UbcH10wt_e3-2.tif (Projected Kymograph)-1	377.934	192	0	192	192	104	0	72563.4	192	80064	1	104	15.392
															onset of separation
	1	C1-20220218_UbcH10C114S_buffer_UbcH10wt_e3-2.tif (Projected Kymograph)-1.tif	73	2577.61	236.35	1854.75	2962.83	71.5	90	188166	2634.33	188166	1	71.5	3.575
									average					velocity (um/sec)
	height	65.667	6.5667		height	30.667	3.0667		4.8167		time (sec)	2.40835		2.41713
	width	47.333			width	31.333			39.333		distance (um)	5.82128						15.392
															range of separatiom			15.0368
	3	Plot of C1-20220218_UbcH10C114S_buffer_UbcH10wt_e3-2.tif (Projected Kymograph)-1	264.878	253.665	18.427	0	255	101.6	0	67190.2	255	96900	1	101.6	15.0368			14.3545
															onset of separation
	1	C1-20220218_UbcH10C114S_buffer_UbcH10wt_e3-2.tif (Projected Kymograph)-1	58	2333.58	212.052	2037.5	2677	57	90	135348	2365.25	135348	1	57	2.85
									average					velocity (um/sec)
	height	33	3.3		height	45.333	4.5333		3.91665		time (sec)	1.95833		3.40718
	width	27			width	63.167			45.0835		distance (um)	6.67236
															range of separatiom
	2	Plot of C1-20220218_UbcH10C114S_buffer_UbcH10wt_e3-2.tif (Projected Kymograph)-1	239.383	248.052	41.572	0	255	96.99	0	59379.4	255	91035	1	96.99	14.3545
															onset of separation
	1	C1-20220218_UbcH10C114S_buffer_UbcH10wt_e3-2.tif (Projected Kymograph)-1:0029-0066	59	2001.68	186.254	1616	2318	58	90	118099	1988	118099	1	58	2.9
	4	C1-20220218_UbcH10C114S_buffer_UbcH10wt_e3-2.tif (Projected Kymograph)-1:0109-0103	64	386.284	285.808	194.222	1057.71	63.167	0	24722.1	219.586	24722.1	1

## Sheet: 20220225
		20220225_UbcH10C114S_cytATL_UbcH10WT_e3								average					velocity (um/sec)
		height	26.75	2.675		height	32	3.2		2.9375		time (sec)	1.46875		4.35813					4.35813		16.7469
		width	22			width	64.5			43.25		distance (um)	6.401							3.33493		14.8345
																onset of separation				4.69397		13.4832
		1	C1-20220225_UbcH10C114S_cytATL_UbcH10WT_e3-1.tif (Projected Kymograph)-1:0021-0066	132.101	2312.16	247.817	1712.5	2613	127.598	90	305440	2352	101735	1	127.598	6.3799				4.77064
																range of separation
		9	Plot of C1-20220225_UbcH10C114S_cytATL_UbcH10WT_e3-1.tif (Projected Kymograph)-1	227.117	248.446	40.399	0	255	113.155	0	56426.3	255	106335	1	113.155	16.7469
										average					velocity (um/sec)
		height	61.3333	6.13333		height	38.667	3.8667		5.00002		time (sec)	2.50001		3.33493
		width	36.667			width	76			56.3335		distance (um)	8.33736
																onset of separation
		1	C1-20220225_UbcH10C114S_cytATL_UbcH10WT_e3-1.tif (Projected Kymograph)-1:0021-0061	43	2585.57	242.316	2145.17	2996.83	41.833	90	111179	2636.04	111179	1	41.833	2.09165
																range of separation
		2	Plot of C1-20220225_UbcH10C114S_cytATL_UbcH10WT_e3-1.tif (Projected Kymograph)-1	254.978	253.322	20.638	0	255	121.333	0	64591.6	255	115515	1	121.333	17.9573
										average					velocity (um/sec)
		height	28.333	2.8333		height	28	2.8		2.81665		time (sec)	1.40833		4.69397
		width	41			width	48.333			44.6665		distance (um)	6.61064
																onset of separation
		1	C1-20220225_UbcH10C114S_cytATL_UbcH10WT_e3-1.tif (Projected Kymograph)-1	40	1805.79	128.001	1427.75	1964	38.5	90	72231.4	1836.08	72231.4	1	38.5	1.925
																range of separation
		3	Plot of C1-20220225_UbcH10C114S_cytATL_UbcH10WT_e3-1.tif (Projected Kymograph)-1	168.676	253.689	18.261	0	255	100.233	0	42791.3	255	98685	1	100.233	14.8345
										average					velocity (um/sec)
		height	22.5	2.25		height	24.5	2.45		2.35		time (sec)	1.175		4.77064
		width	38.75			width	37			37.875		distance (um)	5.6055
																onset of separation
		1	C1-20220225_UbcH10C114S_cytATL_UbcH10WT_e3-2.tif (Projected Kymograph)-1:0021-0089	43	2447.37	330.633	1841	3034	42	90	105237	2483	105237	1	42	2.1
																range of separation
		1	Plot of C1-20220225_UbcH10C114S_cytATL_UbcH10WT_e3-2.tif (Projected Kymograph)-1	210.656	247.975	41.795	0	255	91.103	0	52237.4	255	90015	1	91.103	13.4832
